# Supplementary material for: Genome-wide analysis of BAHD gene family and in vivo characterization of HQT-like genes involved in chlorogenic acid synthesis in tobacco (Nicotiana tabacum L.)
Source: Research Square preprint supplement (doi:10.21203/rs.3.rs-7831200/v1), 2025-12-01
Supplement: Supplementary file 1 [file 145a6df5c460d57280731d57.docx]

Supplementary Material

Genome-wide analysis of *BAHD* gene family and in vivo characterization of *HQT*-like genes involved in chlorogenic acid synthesis in tobacco (*Nicotiana tabacum* L.)

Lin Xia1, 3, Weiwu Song2, Zhengtai Liu4, Yangwei Mu1, Jie Li4, Mengru Liu1, Junping Gao2, Zefeng Li1, Pingping Liu1, Zhong Wang1, Jun Yang1, Shixiao Xu3, *, Sheng Xu4 *, Mingzhu Wu 1, *

a China Tobacco Gene Research Center, Zhengzhou Tobacco Research Institute of China National Tobacco Corporation, Zhengzhou 450001, China

b China Tobacco Hunan Industrial Co., Ltd., Changsha 410007, China

c College of Tobacco Science, Henan Agricultural University, Zhengzhou 450002, China

d Institute of Botany, Jiangsu Province and Chinese Academy of Sciences, Nanjing, 210014, P.R. China

Corresponding author: Mingzhu Wu, [wumz@ztri.com.cn](mailto:wumz@ztri.com.cn;)

**Supplementary Table 1.**

The PCR primer sequences for PCR and qRT-PCR.

| Accession number | Primer name | Sequences (5’→3’) |
| --- | --- | --- |
| Nta11g31320.1 | NtHQT1-clone-F | ATGAAGATCGACATTAAGGA |
| NtHQT1-clone-R | AGTCATACAGGTACTTCTCA |
| Nta21g17010.1 | NtHQT2-clone-F | ATGAGGATCAATATTAAGGA |
| NtHQT2-clone-R | ATTCATACAAGTACTTCTCA |
| Nta13g21800.1 | NtHQT3-clone-F | ATGGGAAGTGAAAAGGTGATG |
| NtHQT3-clone-R | ATCATACAAATACTTCTCAA |
| Nta14g20290.1 | NtHQT4-clone-F | ATGAAAGAAGCATTAAGTAAT |
| NtHQT4-clone-R | GTTAGGATCCTCATTAGCTTC |
| Nta11g31320.1 | NtHQT1-q-F | ATCAACACATGGTCGGAAG |
| NtHQT1-q-R | TGAACGTATTCTGACGATGA |
| Nta21g17010.1 | NtHQT2-q-F | ACCACCAGGCTACTTAGG |
| NtHQT2-q-R | GTATTCGTCGTCCATTCTTG |
| Nta13g21800.1 | NtHQT3-q-F | AGTATCATCCTCCTCCATCT |
| NtHQT3-q-R | TTCGTAAGTGCTACCATCAT |
| Nta14g20290.1 | NtHQT4-q-F | TATCATCCTCCTCCATCTCTA |
| NtHQT4-q-R | TTCGTATGTGCTACCTTCAT |
| L25 | L25-F | CCCCTCACCACAGAGTCTGC |
| L25-R | AAGGGTGTTGTTGTCCTCAATCTT |
| NtHQT1 | NtHQT1-vigs-F  NtHQT2-BJ-R | TCGACGACAAGACCCTGCAGACTTCTGGTGACATCTCTTC |
| NtHQT1 | NtHQT1-vigs-F  NtHQT2-BJ-R | TGAGGAGAAGAGCCCTGCAGTGAACGTATTCTGACGATGA |
| NtHQT2 | NtHQT2-vigs-F | TCGACGACAAGACCCTGCAGGTGTGGTGGAATCTCCTTAG |
| NtHQT2 | NtHQT2-vigs-R | TGAGGAGAAGAGCCCTGCAGAGTTGGTCACTTGTGATCTT |
| NtHQT3 | NtHQT3-vigs-F  NtHQT2-BJ-R | TCGACGACAAGACCCTGCAGATCATCCTCCTCCATCTCTT |
| NtHQT3 | NtHQT3-vigs-R  NtHQT2-BJ-R | TGAGGAGAAGAGCCCTGCAGAGCCTAGACCTACCATCAG |
| NtHQT4 | NtHQT4-vigs-F | TCGACGACAAGACCCTGCAGAGTATCATCCTCCTCCATCT |
| NtHQT4 | NtHQT4-vigs-R | TGAGGAGAAGAGCCCTGCAGAAGCCTAGACCTACCATCA |

**Supplementary Table 2.**

Different modes of gene duplication in tobacco BAHD families.

| **Different modes of gene duplication in tobacco BAHD families. Model ID** | **Gene Name** | **DupType** |
| --- | --- | --- |
| Nta01g11340.1 | NtBAHD1 | Tandem duplication |
| Nta01g11350.1 | NtBAHD2 | Tandem duplication |
| Nta01g19580.1 | NtBAHD3 | Proximal duplication |
| Nta03g13700.1 | NtBAHD4 | WGD or Segmental duplication |
| Nta03g21320.1 | NtBAHD5 | WGD or Segmental duplication |
| Nta03g23080.1 | NtBAHD6 | WGD or Segmental duplication |
| Nta04g11920.1 | NtBAHD7 | Proximal duplication |
| Nta04g11970.1 | NtBAHD8 | Tandem duplication |
| Nta04g13300.1 | NtBAHD9 | WGD or Segmental duplication |
| Nta04g21960.1 | NtBAHD10 | WGD or Segmental duplication |
| Nta04g27440.1 | NtBAHD11 | Tandem duplication |
| Nta04g27460.1 | NtBAHD12 | Tandem duplication |
| Nta04g27470.1 | NtBAHD13 | Tandem duplication |
| Nta04g27470.2 | NtBAHD14 | Tandem duplication |
| Nta05g07210.1 | NtBAHD15 | WGD or Segmental duplication |
| Nta05g07220.1 | NtBAHD16 | Tandem duplication |
| Nta05g14400.1 | NtBAHD17 | WGD or Segmental duplication |
| Nta05g18130.1 | NtBAHD18 | WGD or Segmental duplication |
| Nta05g29800.1 | NtBAHD19 | WGD or Segmental duplication |
| Nta06g07710.1 | NtBAHD20 | WGD or Segmental duplication |
| Nta06g12830.1 | NtBAHD21 | WGD or Segmental duplication |
| Nta06g16320.1 | NtBAHD22 | WGD or Segmental duplication |
| Nta06g24980.1 | NtBAHD23 | WGD or Segmental duplication |
| Nta09g16890.1 | NtBAHD24 | WGD or Segmental duplication |
| Nta09g24910.1 | NtBAHD25 | WGD or Segmental duplication |
| Nta09g24920.1 | NtBAHD26 | Tandem duplication |
| Nta10g14010.1 | NtBAHD27 | WGD or Segmental duplication |
| Nta10g21160.1 | NtBAHD28 | Tandem duplication |
| Nta11g09700.1 | NtBAHD29 | WGD or Segmental duplication |
| Nta11g22420.1 | NtBAHD30 | WGD or Segmental duplication |
| Nta11g31320.1 | NtBAHD31 | WGD or Segmental duplication |
| Nta12g08060.1 | NtBAHD32 | Dispersed duplication |
| Nta13g17110.1 | NtBAHD33 | WGD or Segmental duplication |
| Nta13g21800.1 | NtBAHD34 | WGD or Segmental duplication |
| Nta14g00680.1 | NtBAHD35 | WGD or Segmental duplication |
| Nta14g16260.1 | NtBAHD36 | WGD or Segmental duplication |
| Nta14g20290.1 | NtBAHD37 | WGD or Segmental duplication |
| Nta15g22690.1 | NtBAHD38 | WGD or Segmental duplication |
| Nta15g24850.1 | NtBAHD39 | WGD or Segmental duplication |
| Nta15g24890.1 | NtBAHD40 | WGD or Segmental duplication |
| Nta16g14530.1 | NtBAHD41 | WGD or Segmental duplication |
| Nta16g19590.1 | NtBAHD42 | WGD or Segmental duplication |
| Nta16g21140.1 | NtBAHD43 | WGD or Segmental duplication |
| Nta16g21160.1 | NtBAHD44 | Proximal duplication |
| Nta16g21190.1 | NtBAHD45 | WGD or Segmental duplication |
| Nta16g21210.1 | NtBAHD46 | WGD or Segmental duplication |
| Nta16g23840.1 | NtBAHD47 | WGD or Segmental duplication |
| Nta17g05610.1 | NtBAHD48 | WGD or Segmental duplication |
| Nta17g21590.1 | NtBAHD49 | WGD or Segmental duplication |
| Nta17g21630.1 | NtBAHD50 | Proximal duplication |
| Nta17g21630.3 | NtBAHD51 | Proximal duplication |
| Nta18g18450.1 | NtBAHD52 | WGD or Segmental duplication |
| Nta18g20140.1 | NtBAHD53 | WGD or Segmental duplication |
| Nta19g02780.1 | NtBAHD54 | WGD or Segmental duplication |
| Nta19g02790.1 | NtBAHD55 | WGD or Segmental duplication |
| Nta19g04310.1 | NtBAHD56 | WGD or Segmental duplication |
| Nta19g11930.1 | NtBAHD57 | WGD or Segmental duplication |
| Nta19g11940.1 | NtBAHD58 | Tandem duplication |
| Nta20g00930.1 | NtBAHD59 | Dispersed duplication |
| Nta20g08560.1 | NtBAHD60 | WGD or Segmental duplication |
| Nta20g10500.1 | NtBAHD61 | WGD or Segmental duplication |
| Nta20g10570.1 | NtBAHD62 | Tandem duplication |
| Nta20g10580.1 | NtBAHD63 | WGD or Segmental duplication |
| Nta20g10610.1 | NtBAHD64 | WGD or Segmental duplication |
| Nta20g10700.1 | NtBAHD65 | Proximal duplication |
| Nta20g12010.1 | NtBAHD66 | WGD or Segmental duplication |
| Nta21g02690.1 | NtBAHD67 | Dispersed duplication |
| Nta21g02810.1 | NtBAHD68 | WGD or Segmental duplication |
| Nta21g07980.1 | NtBAHD69 | WGD or Segmental duplication |
| Nta21g08930.1 | NtBAHD70 | WGD or Segmental duplication |
| Nta21g17010.1 | NtBAHD71 | WGD or Segmental duplication |
| Nta22g02260.1 | NtBAHD72 | Dispersed duplication |
| Nta22g02700.1 | NtBAHD73 | WGD or Segmental duplication |
| Nta23g03470.1 | NtBAHD74 | WGD or Segmental duplication |
| Nta23g08220.1 | NtBAHD75 | WGD or Segmental duplication |
| Nta23g21510.1 | NtBAHD76 | WGD or Segmental duplication |
| Nta23g23480.1 | NtBAHD77 | Proximal duplication |
| Nta23g23520.1 | NtBAHD78 | Proximal duplication |
| Nta23g23630.1 | NtBAHD79 | WGD or Segmental duplication |
| Nta23g23650.1 | NtBAHD80 | Proximal duplication |
| Nta23g23670.1 | NtBAHD81 | Proximal duplication |
| Nta23g23680.1 | NtBAHD82 | WGD or Segmental duplication |
| Nta24g03630.1 | NtBAHD83 | WGD or Segmental duplication |
| Nta24g08160.1 | NtBAHD84 | WGD or Segmental duplication |
| Nta24g09860.1 | NtBAHD85 | Dispersed duplication |
| Nta24g12220.1 | NtBAHD86 | WGD or Segmental duplication |
| Nta24g18450.1 | NtBAHD87 | WGD or Segmental duplication |
| Nta24g18450.2 | NtBAHD88 | WGD or Segmental duplication |
| Nta24g19800.1 | NtBAHD89 | Proximal duplication |
| Nta24g19840.1 | NtBAHD90 | Proximal duplication |
| Nta24g19920.1 | NtBAHD91 | WGD or Segmental duplication |
| Nta24g19930.1 | NtBAHD92 | Dispersed duplication |
| Nta24g19940.1 | NtBAHD93 | WGD or Segmental duplication |
| Nta00g00540.1 | NtBAHD94 | WGD or Segmental duplication |

**Supplementary Figure 1.** Alignment of putative BAHD-related proteins. Red boxes indicate the two functional domains HXXXD and DFGWG.

**
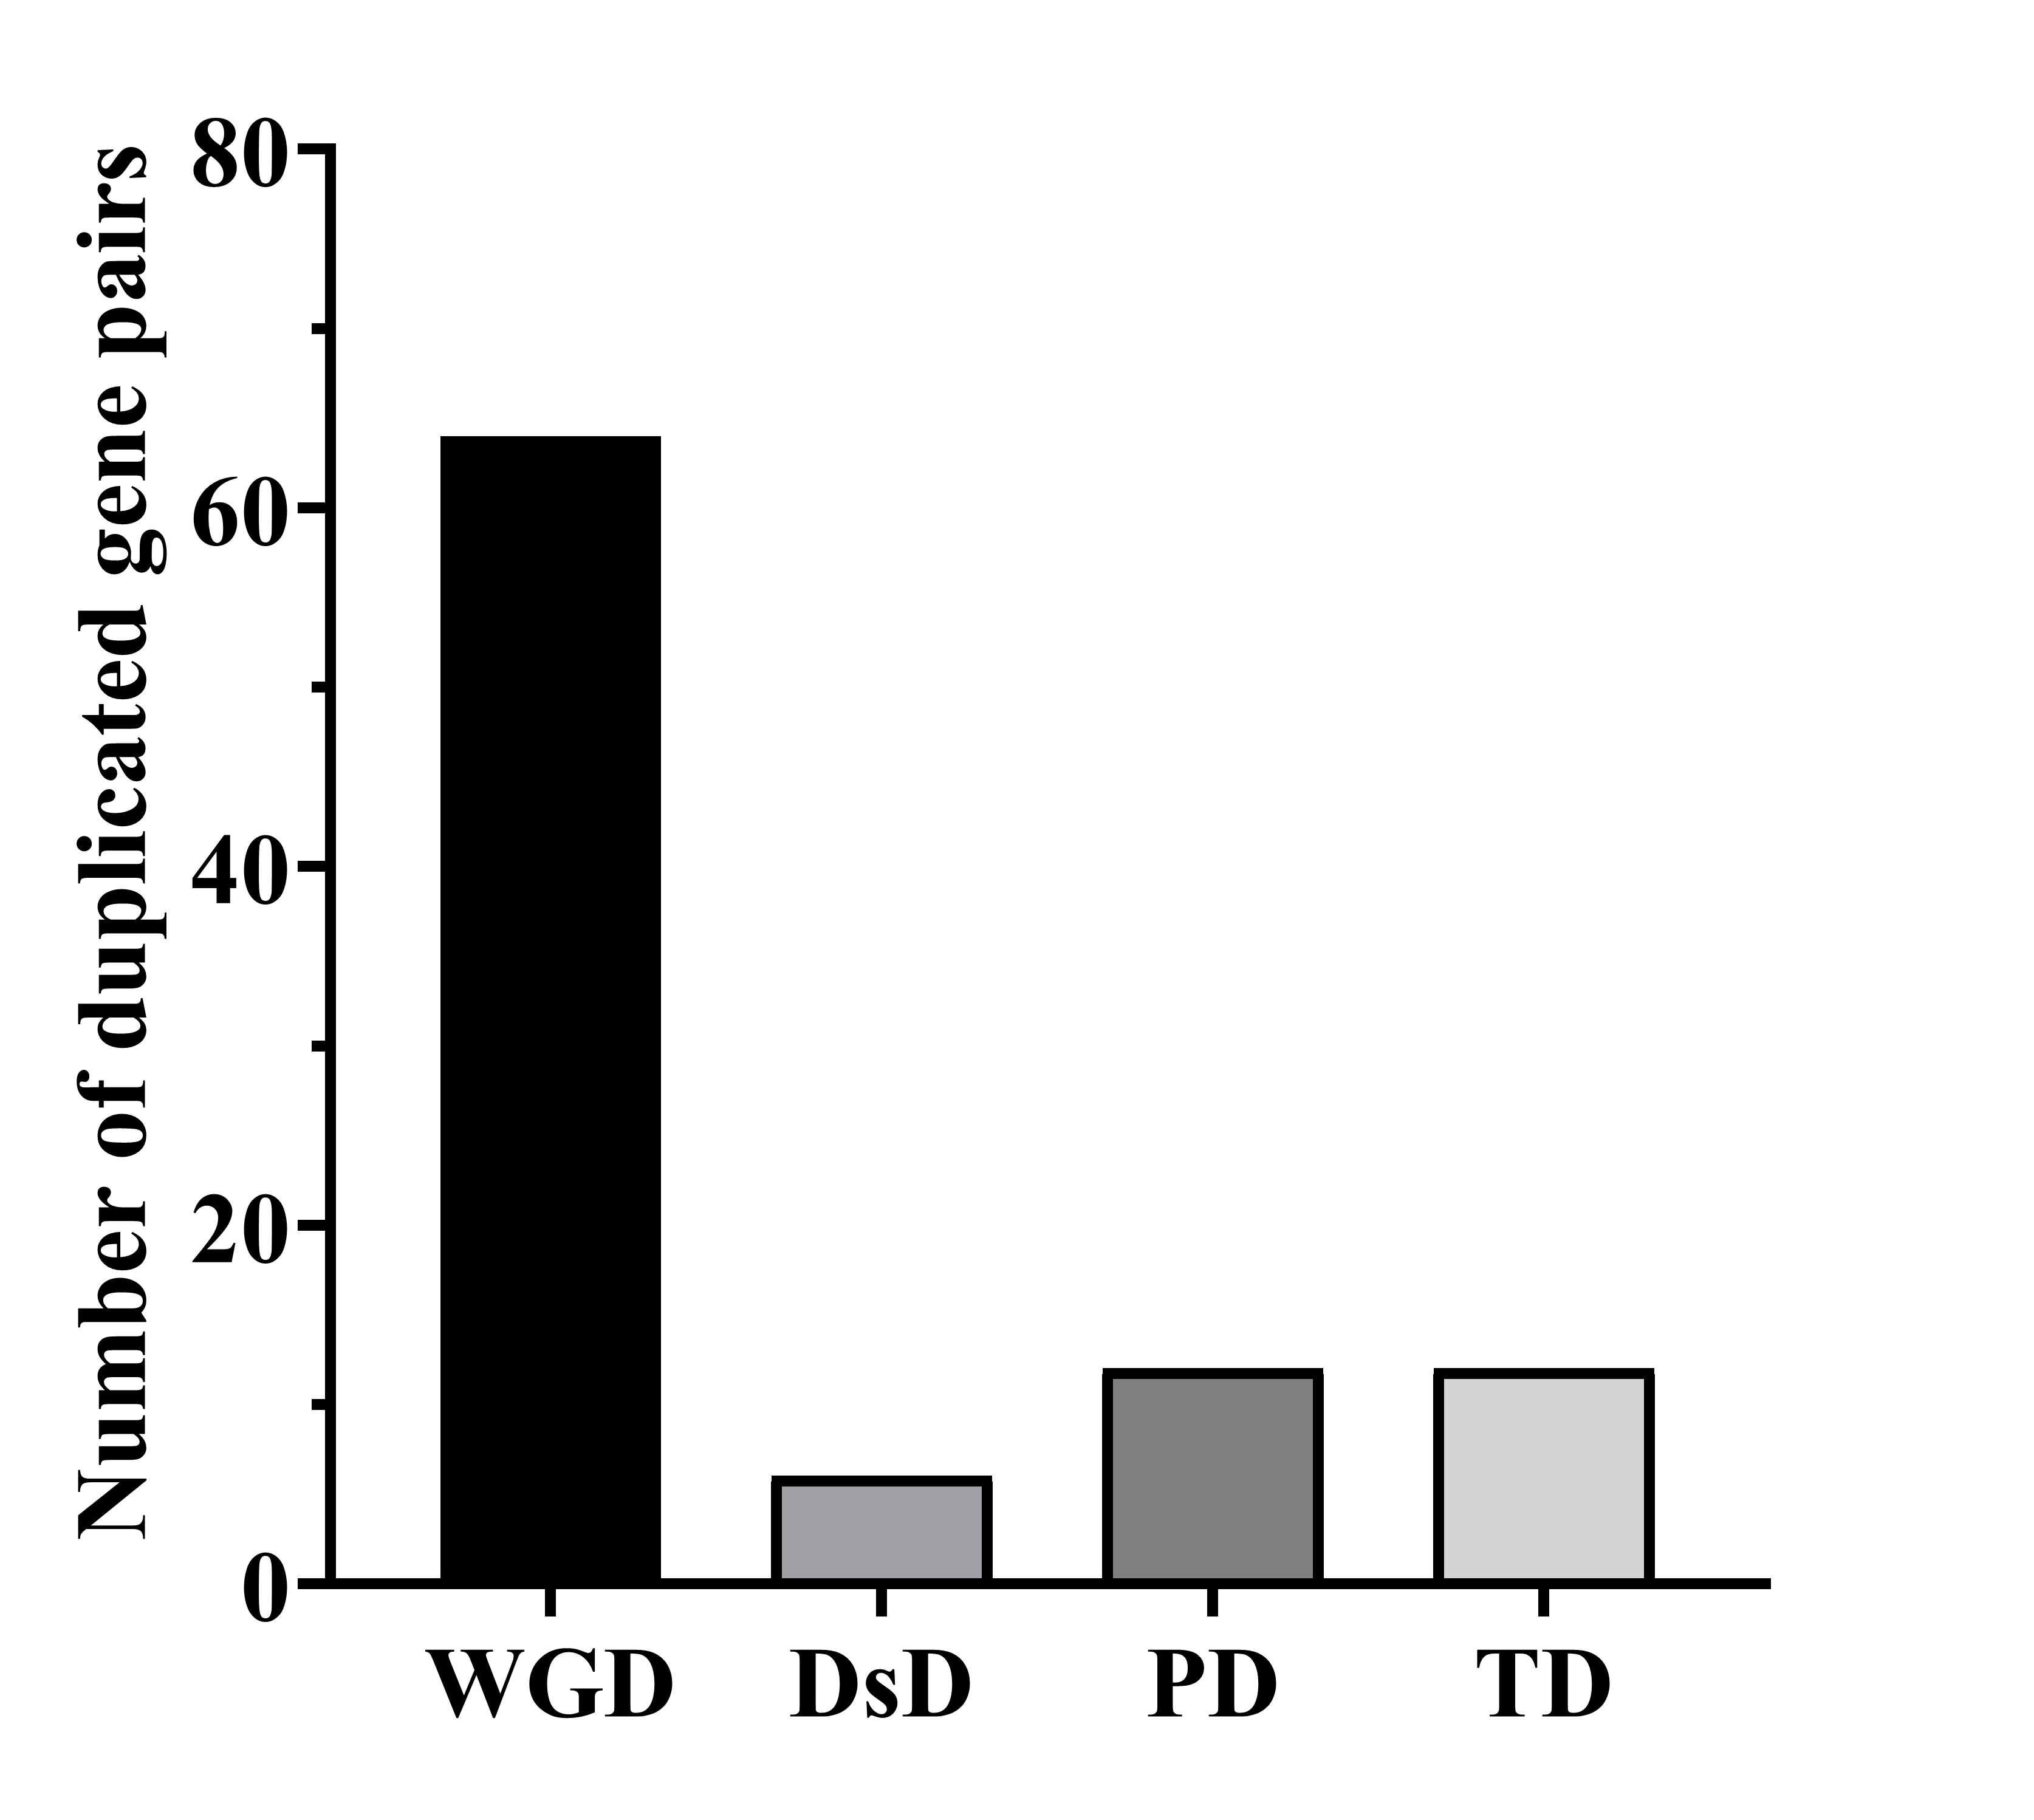
Supplementary Figure 2.** Different modes of gene duplication in tobacco BAHD families.

**
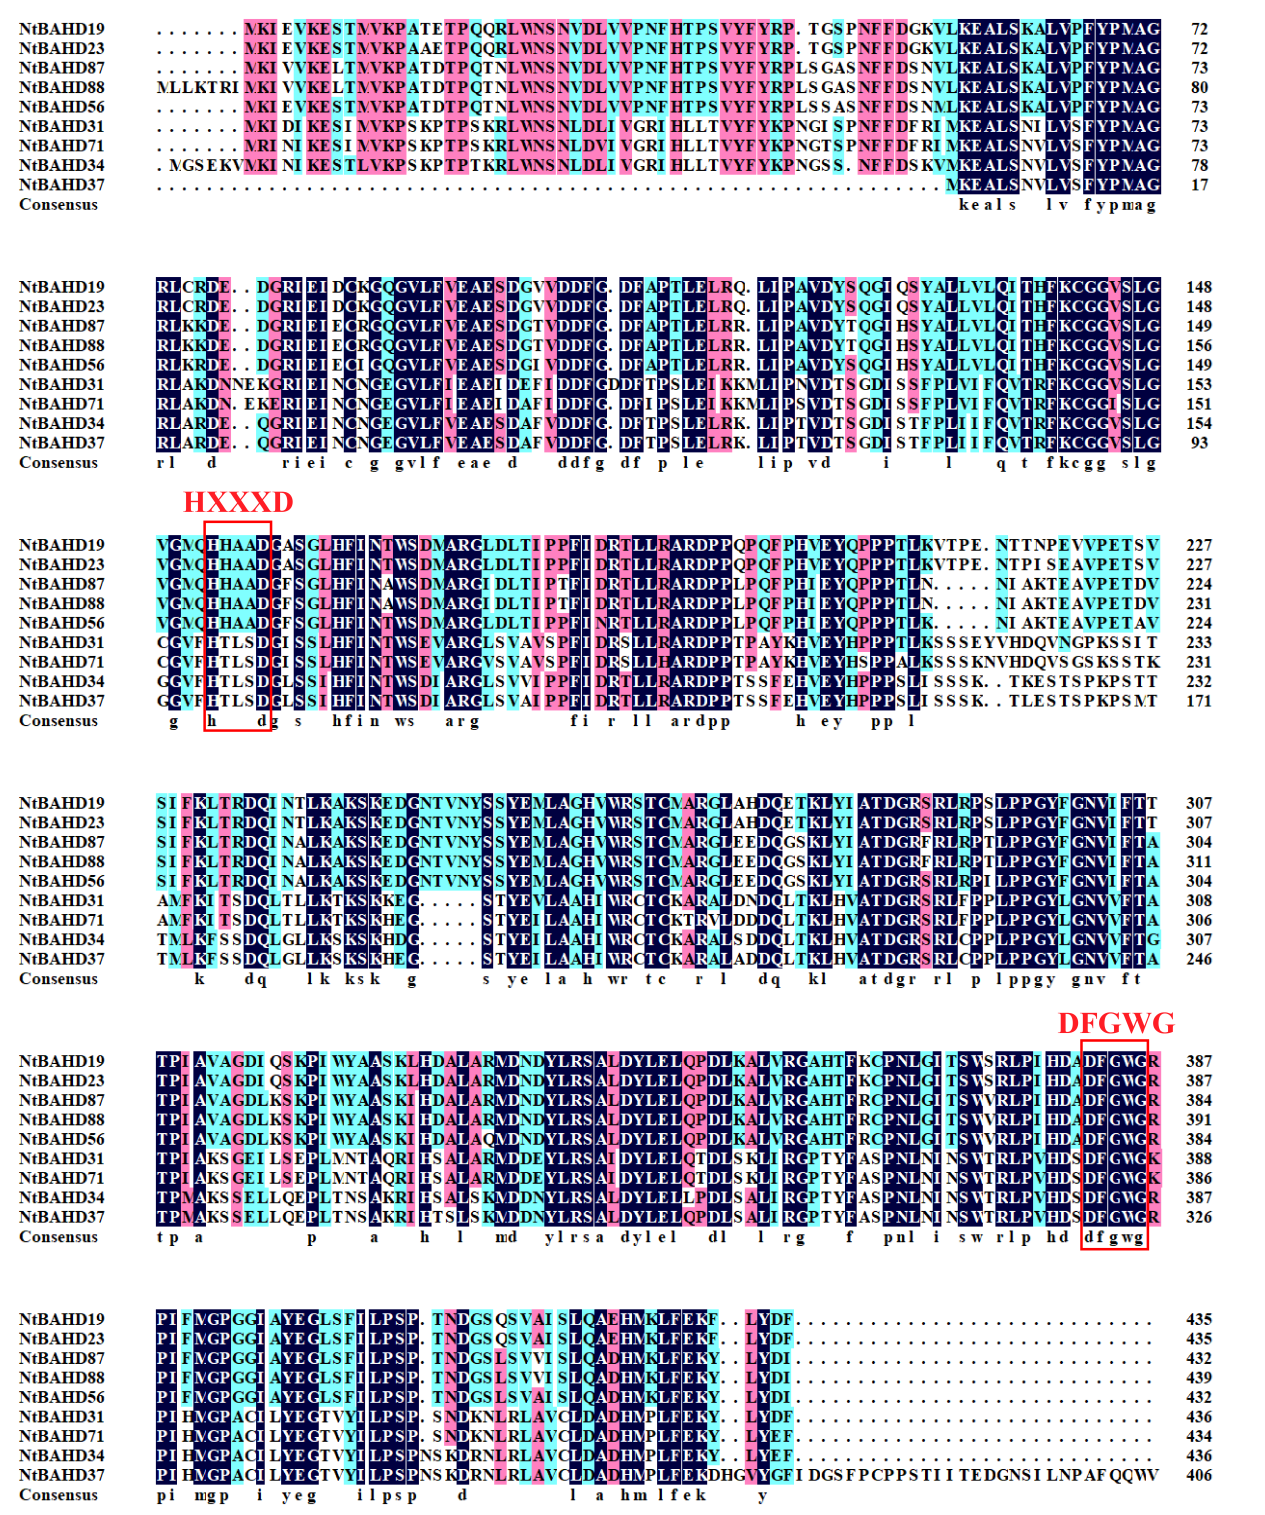
**

**Supplementary Figure 3.** Alignment of the CGA related proteins. The purple boxes indicate two functional domains HXXXD and DFGWG.


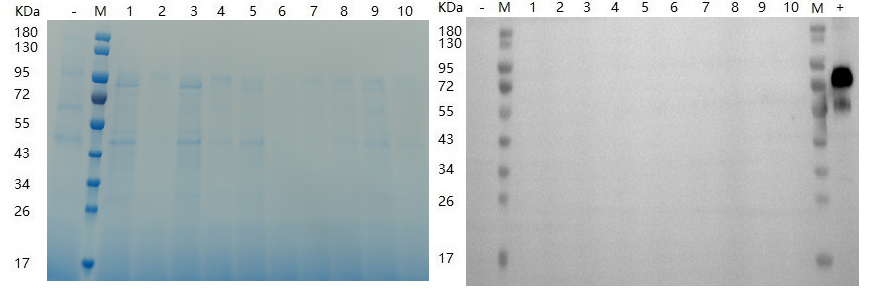

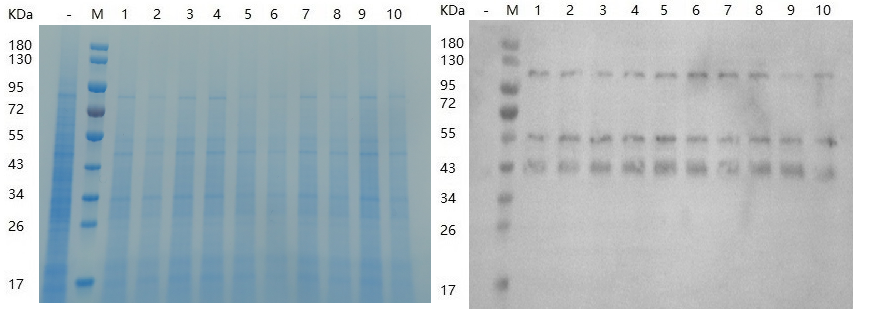


**A**

**B**

**C**

**D**

**Supplementary Figure 4.** Analysis of secreted (A, B) and intracellular (C, D) protein expression was carried out by SDS-PAGE and Western blot using an anti-His antibody. M: Protein marker; Lanes 1-10: Colonies positive by PCR detection; -: Negative control (uninduced); +: Positive control

**Western Blot**

**M1 HQT3**


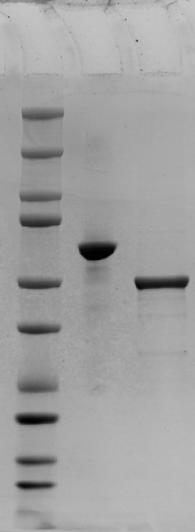


10

15

20

25

37

50

75

100

150

250

**A**

kDa


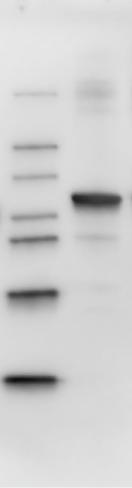


**SDS**

**M1 BSA HQT2**

18

32

42

50

60

80

120

**Western Blot**

**M1 HQT2**

**B**

10


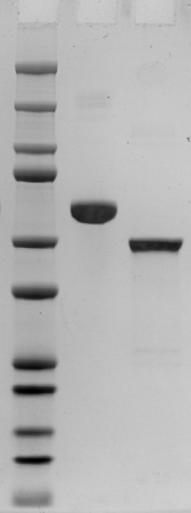


15

20

25

37

50

75

100

1500

2500

**SDS**

**M1 BSA HQT3**

kDa

**C**


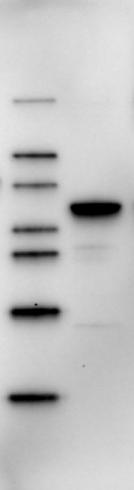


18

32

42

50

60

80

120

**D**


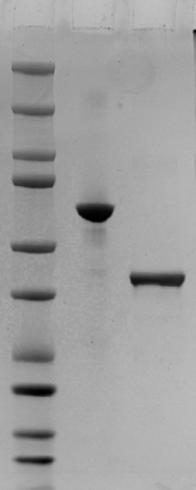


50

**SDS**

**M1 BSA HQT4**

10

15

20

25

37

75

100

150

200

**E**

kDa


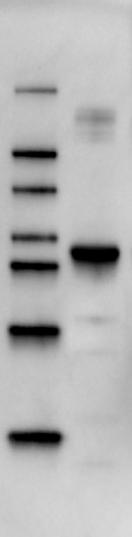


32

18

42

50

60

80

120

**Western Blot**

**M1 HQT4**

kDa

**F**

**Supplementary Figure 5.** Analysis of intracellular protein expression of NtHQT2, NtHQT3, and NtHQT4 by SDS-PAGE and anti-His Western blot. M1: Protein marker; BSA: positive control.


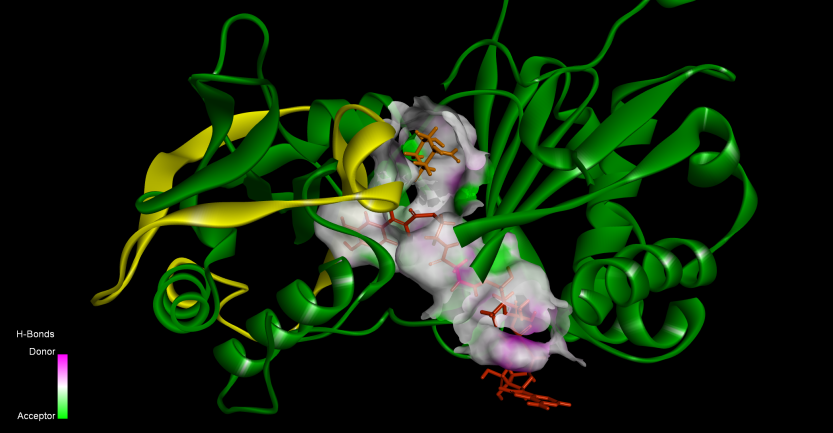


**A**


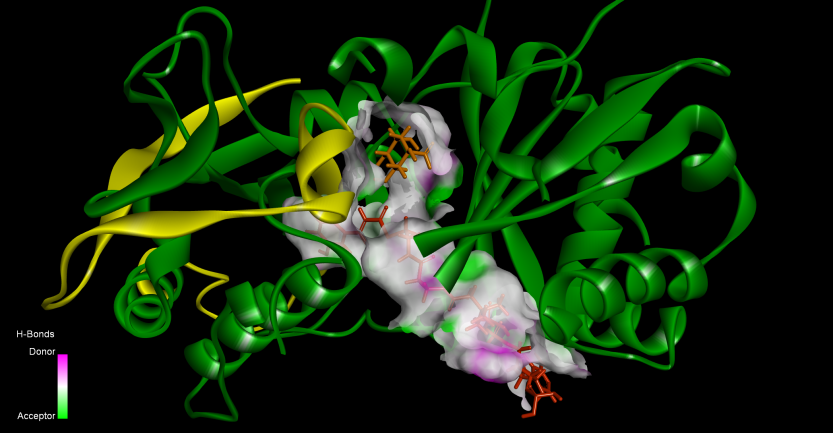


**B**


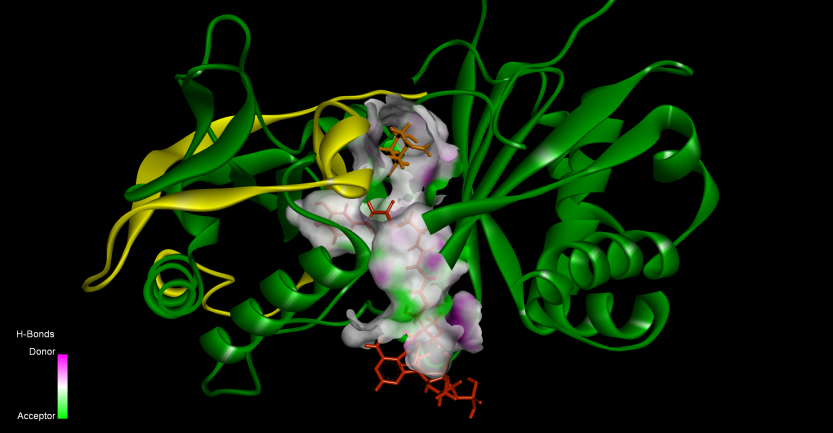


**C**


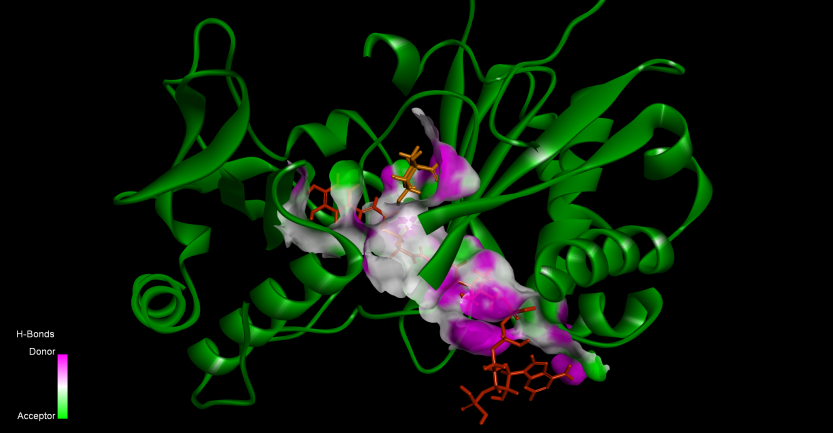


D

**Supplementary Figure 6.** A stereoview depicting the distribution of structural elements of NtHQT1 (A), NtNtHQT2 (B), NtHQT3 (C), and NtHQT4(D). Quinic acid is depicted in orange, Caffeoyl-CoA is represented in red.

**Supplementary Figure 7.** Downregulation of *NtHQT1*, *NtHQT2*, *NtHQT3*, and *NtHQT4* gene expression in *Nicotiana benthamiana* leaves following VIGS-mediated silencing. Bars denoted by different letters indicate significant differences at *P* < 0.05, as determined by Duncan’s multiple test.
