# Supplementary material for: Genome-wide analysis of BAHD gene family and in vivo characterization of HQT-like genes involved in chlorogenic acid synthesis in tobacco (Nicotiana tabacum L.)
Source: Research Square preprint supplement (doi:10.21203/rs.3.rs-7831200/v1), 2025-12-01
Supplement: Supplementary file 2 [file 39440aa05eca0785dd140af1.xlsx]

## Sheet: motif
	Gene ID	Motif HXXXD	Motif DFGWG
1	Nta00g00540.1	√	√
2	Nta00g01020.1	√	×
3	Nta00g01030.1	√	×
4	Nta00g01040.1	√	×
5	Nta00g02840.1	√	×
6	Nta00g05930.1	√	√
7	Nta00g17460.1	√	×
8	Nta01g11340.1	√	√
9	Nta01g11350.1	√	√
10	Nta01g19560.1	√	×
11	Nta01g19580.1	√	√
12	Nta01g31690.1	√	×
13	Nta02g01960.1	√	×
14	Nta02g11330.1	√	×
15	Nta03g01940.1	√	×
16	Nta03g01950.1	√	×
17	Nta03g01960.1	×	×
18	Nta03g13700.1	√	√
19	Nta03g21320.1	√	√
20	Nta03g21990.1	√	×
21	Nta03g23080.1	√	√
22	Nta03g29040.1	√	×
23	Nta03g29080.1	√	×
24	Nta04g11890.1	×	√
25	Nta04g11900.1	√	×
26	Nta04g11910.1	×	×
27	Nta04g11920.1	√	√
28	Nta04g11930.1	√	×
29	Nta04g11940.1	√	×
30	Nta04g11960.1	√	×
31	Nta04g11970.1	√	√
32	Nta04g11980.1	×	√
33	Nta04g12000.1	√	×
34	Nta04g12020.1	√	×
35	Nta04g13300.1	√	√
36	Nta04g21960.1	√	√
37	Nta04g27430.1	×	×
38	Nta04g27440.1	√	√
39	Nta04g27450.1	×	×
40	Nta04g27460.1	√	√
41	Nta04g27470.1	√	√
42	Nta04g27470.2	√	√
43	Nta04g27480.1	×	×
44	Nta04g29090.1	√	×
45	Nta05g07210.1	√	√
46	Nta05g07220.1	√	√
47	Nta05g07730.1	√	×
48	Nta05g08960.1	√	×
49	Nta05g14400.1	√	√
50	Nta05g18130.1	√	√
51	Nta05g29800.1	√	√
52	Nta06g07710.1	√	√
53	Nta06g08600.1	√	×
54	Nta06g10250.1	√	×
55	Nta06g12830.1	√	√
56	Nta06g16320.1	√	√
57	Nta06g24980.1	√	√
58	Nta07g02250.1	√	×
59	Nta07g02280.1	√	×
60	Nta07g02540.1	√	×
61	Nta07g21740.1	√	×
62	Nta07g24260.1	√	×
63	Nta08g18950.1	√	×
64	Nta08g21250.1	√	×
65	Nta09g03480.1	√	×
66	Nta09g15280.1	√	×
67	Nta09g16890.1	√	√
68	Nta09g24910.1	√	√
69	Nta09g24920.1	√	√
70	Nta10g02640.1	√	×
71	Nta10g12450.1	√	×
72	Nta10g14010.1	√	√
73	Nta10g21140.1	×	×
74	Nta10g21150.1	×	√
75	Nta10g21160.1	√	√
76	Nta11g09700.1	√	√
77	Nta11g13700.1	×	√
78	Nta11g15110.1	√	×
79	Nta11g18460.1	√	×
80	Nta11g21660.1	√	×
81	Nta11g21670.1	×	×
82	Nta11g22420.1	√	√
83	Nta11g28000.1	√	×
84	Nta11g31320.1	√	√
85	Nta12g05990.1	√	×
86	Nta12g08060.1	√	√
87	Nta12g14400.1	√	×
88	Nta12g16950.1	√	×
89	Nta12g23030.1	√	×
90	Nta12g23030.2	√	×
91	Nta13g00710.1	×	×
92	Nta13g07640.1	×	√
93	Nta13g09230.1	√	×
94	Nta13g17110.1	√	√
95	Nta13g21800.1	√	√
96	Nta14g00680.1	√	√
97	Nta14g06220.1	√	×
98	Nta14g06240.1	√	×
99	Nta14g06250.1	√	×
100	Nta14g08510.1	√	×
101	Nta14g16260.1	√	√
102	Nta14g20290.1	√	√
103	Nta14g21740.1	√	×
104	Nta15g06230.1	×	×
105	Nta15g17800.1	×	×
106	Nta15g22690.1	√	√
107	Nta15g24850.1	√	√
108	Nta15g24860.1	×	√
109	Nta15g24880.1	×	×
110	Nta15g24890.1	√	√
111	Nta15g24900.1	×	×
112	Nta15g24960.1	√	×
113	Nta15g24970.1	×	√
114	Nta16g06090.1	×	×
115	Nta16g14530.1	√	√
116	Nta16g19590.1	√	√
117	Nta16g21140.1	√	√
118	Nta16g21150.1	×	√
119	Nta16g21160.1	√	√
120	Nta16g21170.1	×	×
121	Nta16g21190.1	√	√
122	Nta16g21210.1	√	√
123	Nta16g21280.1	×	√
124	Nta16g23840.1	√	√
125	Nta17g05610.1	√	√
126	Nta17g11480.1	×	×
127	Nta17g20080.1	√	×
128	Nta17g21590.1	√	√
129	Nta17g21630.1	√	√
130	Nta17g21630.2	√	√
131	Nta17g21630.3	√	√
132	Nta18g05370.1	√	×
133	Nta18g05380.1	×	√
134	Nta18g18450.1	√	√
135	Nta18g20140.1	√	√
136	Nta19g02780.1	√	√
137	Nta19g02790.1	√	√
138	Nta19g04310.1	√	√
139	Nta19g04310.2	√	√
140	Nta19g04310.3	√	√
141	Nta19g08810.1	√	×
142	Nta19g11710.1	×	×
143	Nta19g11930.1	√	√
144	Nta19g11940.1	√	√
145	Nta19g13640.1	√	×
146	Nta19g13650.1	√	×
147	Nta20g00930.1	√	√
148	Nta20g08560.1	√	√
149	Nta20g10500.1	√	√
150	Nta20g10530.1	×	×
151	Nta20g10540.1	×	√
152	Nta20g10570.1	√	√
153	Nta20g10580.1	√	√
154	Nta20g10610.1	√	√
155	Nta20g10700.1	√	√
156	Nta20g10710.1	×	×
157	Nta20g12010.1	√	√
158	Nta21g02690.1	√	√
159	Nta21g02810.1	√	√
160	Nta21g05910.1	×	×
161	Nta21g07980.1	√	√
162	Nta21g07990.1	√	×
163	Nta21g08930.1	√	√
164	Nta21g13910.1	√	×
165	Nta21g17010.1	√	√
166	Nta22g02260.1	√	√
167	Nta22g02700.1	√	√
168	Nta22g02780.1	√	×
169	Nta22g17270.1	√	×
170	Nta23g01800.1	×	×
171	Nta23g03280.1	×	√
172	Nta23g03470.1	√	√
173	Nta23g05070.1	√	×
174	Nta23g08220.1	√	√
175	Nta23g12020.1	√	×
176	Nta23g12050.1	√	×
177	Nta23g21510.1	√	√
178	Nta23g23480.1	√	√
179	Nta23g23490.1	√	×
180	Nta23g23500.1	√	×
181	Nta23g23510.1	√	×
182	Nta23g23520.1	√	√
183	Nta23g23570.1	×	√
184	Nta23g23630.1	√	√
185	Nta23g23650.1	√	√
186	Nta23g23670.1	√	√
187	Nta23g23680.1	√	√
188	Nta24g01670.1	×	×
189	Nta24g03630.1	√	√
190	Nta24g08160.1	√	√
191	Nta24g09860.1	√	√
192	Nta24g11990.1	×	√
193	Nta24g12220.1	√	√
194	Nta24g14450.1	√	×
195	Nta24g14700.1	√	×
196	Nta24g18450.1	√	√
197	Nta24g18450.2	√	√
198	Nta24g19720.1	√	×
199	Nta24g19730.1	×	√
200	Nta24g19740.1	×	√
201	Nta24g19750.1	√	×
202	Nta24g19760.1	×	√
203	Nta24g19770.1	√	×
204	Nta24g19790.1	×	√
205	Nta24g19800.1	√	√
206	Nta24g19810.1	×	√
207	Nta24g19820.1	√	×
208	Nta24g19830.1	×	√
209	Nta24g19840.1	√	√
210	Nta24g19920.1	√	√
211	Nta24g19930.1	√	√
212	Nta24g19940.1	√	√

## Sheet: DNA and RNA
Gene ID (http://lifenglab.hzau.edu.cn/Nicomics/index.php )	Gene Name	DNA	RNA
Nta01g11340.1	NtBAHD1	TCAGTTCATTAACCATGGCCACGGCTTCGGCATTATTATCATCGCCATCACTTGTTTCCATTTGTGACAAATCCTTCATCAAACCTTCTTGTCTTACCCCTCCTAAGCTTAGACTTCACAAGCTCTCTTTCGTCGATCAATTCCTCAGTAATAAGTATATTCCTGTGGCCTTTTTTTACCCTAAACCGCAACGAGAAGAGTCAAACAATAATTCCCAACTTTCCCATATAGCTGATTTATTGCAGAGATCTCTATCACAAACTTTAGTCTCTTACTATCCTTATGCAGGAAAATTGAGAGACAATGCTACTGTTGAGTGTAACGATATAGGAGCTGAGTTCTTGAGTGTTCAAATAAAGTATCCCATGTCTGAAATCCTTAACCATCCTCATGCAACTG…	ATGGCCACGGCTTCGGCATTATTATCATCGCCATCACTTGTTTCCATTTGTGACAAATCCTTCATCAAACCTTCTTGTCTTACCCCTCCTAAGCTTAGACTTCACAAGCTCTCTTTCGTCGATCAATTCCTCAGTAATAAGTATATTCCTGTGGCCTTTTTTTACCCTAAACCGCAACGAGAAGAGTCAAACAATAATTCCCAACTTTCCCATATAGCTGATTTATTGCAGAGATCTCTATCACAAACTTTAGTCTCTTACTATCCTTATGCAGGAAAATTGAGAGACAATGCTACTGTTGAGTGTAACGATATAGGAGCTGAGTTCTTGAGTGTTCAAATAAAGTATCCCATGTCTGAAATCCTTAACCATCCTCATGCAACTGATGCAGAGAGTATA…
Nta01g11350.1	NtBAHD2	GTCCATCAAAATGGCGCAGGCAATCAATCTATATCAGTTCATTAACCATGGCCACGGCTTCGGCATTATTATCATCGCCATCACTTGTTTCCATTTGTGACAAATCCTTCATCAAACCTTCTTGTCTTACCCCTCCTAAGCTTAGACTTCACAAGCTCTCTTTCGTCGATCAATTCCTCAGTAATCAGTATATTCCTGTGGCCTTTTTTTACCCTAAACCGCAACGAGAAGAGTCAAACAATAATTCCCAACTTTCCCATATAGCTGATTTGTTGCAGAGATCTCTATCACAAACGTTAGTCTCTTACTATCCTTATGCAGGAAAATTGAGAGACAATGCTACTGTTGAGTGTAACGATATAGGAGCTGAGTTCTTGAGTGTTCAAATAAAGTATCCCA…	ATGGCCACGGCTTCGGCATTATTATCATCGCCATCACTTGTTTCCATTTGTGACAAATCCTTCATCAAACCTTCTTGTCTTACCCCTCCTAAGCTTAGACTTCACAAGCTCTCTTTCGTCGATCAATTCCTCAGTAATCAGTATATTCCTGTGGCCTTTTTTTACCCTAAACCGCAACGAGAAGAGTCAAACAATAATTCCCAACTTTCCCATATAGCTGATTTGTTGCAGAGATCTCTATCACAAACGTTAGTCTCTTACTATCCTTATGCAGGAAAATTGAGAGACAATGCTACTGTTGAGTGTAACGATATAGGAGCTGAGTTCTTGAGTGTTCAAATAAAGTATCCCATGTCTGAAATCCTTAACCATCCTCATGCAACTGATGCAGAGAGTATA…
Nta01g19580.1	NtBAHD3	ATGGCAAGGCCCTCAACTCCTACCCCAGACCACCTTCGGTTCCTCAATCTTTCATTGTTTGATCAGCTGGCTCGTCATATCTATGTACCAGTACTATTACACTACTTGCCGAGCAGTGAATGGAACAGCGCAGAAAACACTGAAACATATGATAAGCTGCAAAAATCATTGGCTGAAACCTTAGCCAAGTTTTACCCTCTAGCAGGAAGATTTAGAAAAGATGACCTCTCAATTCACTGCAATGACGAAGGTGTTGACTATGTCGAAACCAAAGTCAATGCGGATCTTGCTGAGTTTCTCCAACAAGGACCCAAGAATATTGAGCTTTTGGATGATCTTCTTCCAAAAACAGATCTTCCATCAAGCCCATTACTTGGAATCCAAGTAAACATATTCAAT…	ATGGCAAGGCCCTCAACTCCTACCCCAGACCACCTTCGGTTCCTCAATCTTTCATTGTTTGATCAGCTGGCTCGTCATATCTATGTACCAGTACTATTACACTACTTGCCGAGCAGTGAATGGAACAGCGCAGAAAACACTGAAACATATGATAAGCTGCAAAAATCATTGGCTGAAACCTTAGCCAAGTTTTACCCTCTAGCAGGAAGATTTAGAAAAGATGACCTCTCAATTCACTGCAATGACGAAGGTGTTGACTATGTCGAAACCAAAGTCAATGCGGATCTTGCTGAGTTTCTCCAACAAGGACCCAAGAATATTGAGCTTTTGGATGATCTTCTTCCAAAAACAGATCTTCCATCAAGCCCATTACTTGGAATCCAAGTAAACATATTCAAT…
Nta03g13700.1	NtBAHD4	TTTATCTTCTGCAACAAATGTCCATAGATGACGAAACATCAAGCGGTATCTACATGTGTAATTAGGTCTGGGAAACCCATAGACAGAAACTCTCCTACCAAAAATATTCACTTAACTCCGTGGGATCTCCAACTCCTCACAGTAGATCCAATCCAAAAAGGACTACTTTTCCGAAAACCAAATCCTCAGCAACATACAGAGTTAGCAACATCATCAGAAATCATTAATCGCCTAAAAACCTCACTCTCTGATACTCTAAATTTTTTTCCTCTCCTTGTTGGCCGACTTGTTGCAAGTAAAAACAGTGACAACACCTTATCTTTCTTTATTAATTGCAGCAATGAAGGAGCTGAATTCACTCATGCAACTGCGCCAGGCTTGACTGTCGCTGATATCGTG…	ATGACGAAACATCAAGCGGTATCTACATGTGTAATTAGGTCTGGGAAACCCATAGACAGAAACTCTCCTACCAAAAATATTCACTTAACTCCGTGGGATCTCCAACTCCTCACAGTAGATCCAATCCAAAAAGGACTACTTTTCCGAAAACCAAATCCTCAGCAACATACAGAGTTAGCAACATCATCAGAAATCATTAATCGCCTAAAAACCTCACTCTCTGATACTCTAAATTTTTTTCCTCTCCTTGTTGGCCGACTTGTTGCAAGTAAAAACAGTGACAACACCTTATCTTTCTTTATTAATTGCAGCAATGAAGGAGCTGAATTCACTCATGCAACTGCGCCAGGCTTGACTGTCGCTGATATCGTGAAGCCAACTTACGTGCCAAAGATTGTC…
Nta03g21320.1	NtBAHD5	ATGGAAACCATTATCCTCTCTAAGCAAAAAGTGAAGCCATCCAAACCAACACCTCCACACCTGAAAAACCACAAACTATGCTTTTTAGACCAAGTTCAACCGCCAGTAAGAATCAAAACTATCCTCTTCTACGAAAACACCACACCCGCACAAAATCAAAATAACCTCAAGAATGCCCTTTCTGAGACACTAACTCTCTTCTATCCACTTGCTGGTGAACTGAAAGAAGGTTCAACTTTTGTAGACTGCAATGACACTGGAGTTGTTTACGTTGAGGCTCAAGCGAAGACGTGTCTTAGTTATTTTCTTGAGAACCCTGATCTCTCACAACTCAAGAAACTGATGATAGATGTTGAATGTCATTTTGTTTCTTTTCAGGTTACTAGATTTGAATGTGGA…	ATGGAAACCATTATCCTCTCTAAGCAAAAAGTGAAGCCATCCAAACCAACACCTCCACACCTGAAAAACCACAAACTATGCTTTTTAGACCAAGTTCAACCGCCAGTAAGAATCAAAACTATCCTCTTCTACGAAAACACCACACCCGCACAAAATCAAAATAACCTCAAGAATGCCCTTTCTGAGACACTAACTCTCTTCTATCCACTTGCTGGTGAACTGAAAGAAGGTTCAACTTTTGTAGACTGCAATGACACTGGAGTTGTTTACGTTGAGGCTCAAGCGAAGACGTGTCTTAGTTATTTTCTTGAGAACCCTGATCTCTCACAACTCAAGAAACTGATGATAGATGTTGAATGTCATTTTGTTTCTTTTCAGGTTACTAGATTTGAATGTGGA…
Nta03g23080.1	NtBAHD6	AAATAATAATACCACTAAATTATCCACTTTCACAAGGAATAATATTATTCCCTTTGTTTCAATTTAGATGACATATTTTGATTATTGAAACAGAAGAAGTAACATGTTGTAATATCCATGACATTCATGTGGCTGATATTGATCATTTACACACTTCTATAAATCCAAATCGAATTAATGCAAACTTCAATTCACAAACAAAACTATGTCAAGTTCAAGACCATTAGTGATATCAATGGCGATGCAAAAGCCAGAATTAGTAATCCCAGCAACAGCAACACCTCGTGAGAGAAAACATCTTTCTGATATAGATGATCAAGGGAGTCTTCGTTTCCAAATTCCCATATTGATGTTTTACAAATTTAGTCCTTCAATGGAAGGCAAAGATCCTGTAAAAGT…	ATGTCAAGTTCAAGACCATTAGTGATATCAATGGCGATGCAAAAGCCAGAATTAGTAATCCCAGCAACAGCAACACCTCGTGAGAGAAAACATCTTTCTGATATAGATGATCAAGGGAGTCTTCGTTTCCAAATTCCCATATTGATGTTTTACAAATTTAGTCCTTCAATGGAAGGCAAAGATCCTGTAAAAGTTATTAAAGAAGGACTGTCAAAGACACTAGTGTTTTACTATCCATTAGCCGGTAGAATCATTGAATTAATGCCTGATAGGAAGCTTGTTGTGGATTGCAATGGTGAAGGAATCTTGTTTGTAGAAGCTGATGCTCAAGTGGAGCTTGATAAGTTAGGAGACTCCATTAAACCACCATGTCCATACTTGGATCAACTGCTGTATAGT…
Nta04g11920.1	NtBAHD7	GTGTGTGCGTATATAGTCATAGCGTTATACTAATTTCCAATTGTGTGTATATATATGTGTCCGTTTATGCATCAAAATGGCGTAGGCAATTAATTGATATATAGGAGTATCGCATAAAGCTAGGGAATTGAAGTAGTGTTATTTGTTCATTAACCATATCATGGCCGCTTCGGCATTATTATCATCACTTGTTTCCATTTGTGACAAATCCTTCGTCAAACCTTCTACTCTCACCCCTTCTACACTTAGACTTCACAAGCTATCTTTCGTCGATCAATCCCTCAGTAATATGTACATTCCTGTGGCCTTTTTTTACCCTAAACCGCAAAGAGAAGAGTCAAACAATTCTCAACTTTCCCATATAGCTGATTTGTTGCAGACATCTCTGTCACAAACTCT…	ATGCTACTGTTGAGTGTAATGACATGGGAGCTGAGTTTCTTGAGTGTTAAAATAAATTGTCCCATGTCTGAAATCCTTAACCATCCTCATGCAACTGATGCAGAGAGTATAGTTTTTCCAAAGGACTTGCCTTGGAAGAATAATTATAAAGGTGGTAATTTACTTGTGGTTCAATTAAGTAAGTTTGATTGTCGGGGAATAGCCATTAGTGCATGTTTATCGCATAAGATTGGCGATGGTTGCTCTGTGATTAATTTTCTTAATCATTGGGTTAATGTCACTCGTGATCGTAGATTTATAGTTCCTTCTCCTAGATTTGTAGGAGATTCTATTTTCTCTTCACTAAATGGTCCTCTTATTGCTCCACAAATTATGTCTAACGTCAGTGAGTGCGCGCAG…
Nta04g11970.1	NtBAHD8	ATGGCCGCTTCGGCATTATTATCATCACTTGTTTCCATTTGTGACAAATCCTTCGTCAAACCTTCTACTCTCACCCCTTCTACACTTAGACTTCACAAGCTATCTTTCGTCGATCAATCCCTCAGTAATATGTACATTCCTGTGGCCTTTTTTTACCCTAAACCGCAAAGAGAAGAGTCAAACAATTCTCAACTTTCCCATATAGCTGATTTGTTGCAGACATCTCTGTCACAAACTCTAGTCTCTTACTATCTTTACGCAGGAATATTGAGAGACAATGCTACTGTTGAGTGTAATGACATGGGAGCTGAGTTCTTGAGTGTTAAAATAAATTGTCCTATGTCTGAAATCCTTAACCATCCTCATGCAACTGATGCAGAGAGTATAGTTTTTCCAAAG…	ATGGCCGCTTCGGCATTATTATCATCACTTGTTTCCATTTGTGACAAATCCTTCGTCAAACCTTCTACTCTCACCCCTTCTACACTTAGACTTCACAAGCTATCTTTCGTCGATCAATCCCTCAGTAATATGTACATTCCTGTGGCCTTTTTTTACCCTAAACCGCAAAGAGAAGAGTCAAACAATTCTCAACTTTCCCATATAGCTGATTTGTTGCAGACATCTCTGTCACAAACTCTAGTCTCTTACTATCTTTACGCAGGAATATTGAGAGACAATGCTACTGTTGAGTGTAATGACATGGGAGCTGAGTTCTTGAGTGTTAAAATAAATTGTCCTATGTCTGAAATCCTTAACCATCCTCATGCAACTGATGCAGAGAGTATAGTTTTTCCAAAG…
Nta04g13300.1	NtBAHD9	CTTTGTCACTTGCCATATCTGAGCAATATATATAATTCCTTTCTCCCCCGTTTATCTTCTGCAACAAATGTCCAGAGATGACGAAACTTCAAGTGGTATCTACATGTGTAATTATGCCAGGCAAACCCATAGACAGAAACTCTCCTACCAAAAATATTCACTTAACTCCATGGGATCTTCAACTCCTCACAGTAGATCCAATCCAAAAAGGACTACTTTTCCGAAAACCAAATCCTCAGCAACATAGAAAGTTAGCAACATCATCAGAAATCATCAATCGCCTTAAAACCTCACTCTCTGATACTCTAGATTTTTTCCCTCTCCTTGCCGGTCGACTTGCTGCTTGTAAAAACAGTGACAACACCTTATCTTTCTTTATTAATTGCAACAATGAAGGAG…	ATGACGAAACTTCAAGTGGTATCTACATGTGTAATTATGCCAGGCAAACCCATAGACAGAAACTCTCCTACCAAAAATATTCACTTAACTCCATGGGATCTTCAACTCCTCACAGTAGATCCAATCCAAAAAGGACTACTTTTCCGAAAACCAAATCCTCAGCAACATAGAAAGTTAGCAACATCATCAGAAATCATCAATCGCCTTAAAACCTCACTCTCTGATACTCTAGATTTTTTCCCTCTCCTTGCCGGTCGACTTGCTGCTTGTAAAAACAGTGACAACACCTTATCTTTCTTTATTAATTGCAACAATGAAGGAGCTGAATTCACTCATGCCACTGCACCAGGCTTGACTGTGGCTGATATCGTGGAGCCAACTTATGTGCCAAAGATTGTC…
Nta04g21960.1	NtBAHD10	ATGGGTGCCAAAAGGGACTTCAATGTGAATGTGATCAAAACTGAGGTGGTGGCAGCATCGTTGCCAATGCAAGAGCATTGGCTACCACAGTCAAATCTTGATTTGCTCTTGCCTCCAATGGACGTTGGAGTTTTCATTTGTTATCAGAACCCCATTATTTCTGGGTTACCAAAATATTCATTTGGGTCAATGATCAAAGTTCTTAAGGTTTCTTTGGCTGAAACCTTGGTTTCCTATTATGCATTTGCAGGGGAGTTAGTTCAGAACCTTGCTGGAGAGCCCGAAATTCTTTGCAACAATGCGGGAGTCAATTTCACAGAAGCTTGGGCTGATGTAGAGCTCAAAGAAATCAACTTGTATAATCCAGATGAAAGCATAGAGGGTAAGCTTGTACCAAAG…	ATGGGTGCCAAAAGGGACTTCAATGTGAATGTGATCAAAACTGAGGTGGTGGCAGCATCGTTGCCAATGCAAGAGCATTGGCTACCACAGTCAAATCTTGATTTGCTCTTGCCTCCAATGGACGTTGGAGTTTTCATTTGTTATCAGAACCCCATTATTTCTGGGTTACCAAAATATTCATTTGGGTCAATGATCAAAGTTCTTAAGGTTTCTTTGGCTGAAACCTTGGTTTCCTATTATGCATTTGCAGGGGAGTTAGTTCAGAACCTTGCTGGAGAGCCCGAAATTCTTTGCAACAATGCGGGAGTCAATTTCACAGAAGCTTGGGCTGATGTAGAGCTCAAAGAAATCAACTTGTATAATCCAGATGAAAGCATAGAGGGTAAGCTTGTACCAAAG…
Nta04g27440.1	NtBAHD11	CCCAAATGCGTACTATGAATTAGTGCAAACCTCAATTCAGAAACAAAACTATGTCAAGTTCAAGACCATTAGTGATATCAATGACGCTGCAAAAGCCAGAATTAGTAATTCCAGCAACAACAACACCTCGTGAGAGAAAACATCTTTCTGATATAGATGATCAAGGGAGTCTTCGTTTTCAAATTCCCATATTAATGTTTTACAAATATAATCCTTCAATGGAAGGCAAAGATCCTGTAAATCTCATCAAAGAAGGATTGTCAAAGACACTAGTGTTTTACTATCCATTAGCTGGTAGGATCATTGAATTAATGCCTGATAGGAAGCTTGTTGTGGATTGCAATGGTGAAGGAATCTTGTTTGTAGAAGCTGATGCCCAAGTGGAGCTTGACAAGTTAG…	ATGTCAAGTTCAAGACCATTAGTGATATCAATGACGCTGCAAAAGCCAGAATTAGTAATTCCAGCAACAACAACACCTCGTGAGAGAAAACATCTTTCTGATATAGATGATCAAGGGAGTCTTCGTTTTCAAATTCCCATATTAATGTTTTACAAATATAATCCTTCAATGGAAGGCAAAGATCCTGTAAATCTCATCAAAGAAGGATTGTCAAAGACACTAGTGTTTTACTATCCATTAGCTGGTAGGATCATTGAATTAATGCCTGATAGGAAGCTTGTTGTGGATTGCAATGGTGAAGGAATCTTGTTTGTAGAAGCTGATGCCCAAGTGGAGCTTGACAAGTTAGGAGACTCCATTAAACCACCATGCCCATACTTGGATCAATTGCTATACAAT…
Nta04g27460.1	NtBAHD12	TATAAATCCAAACCCAAAAGCGTACTATGAATTAGTGCAAACCTCAATTCAGAAACAAAACTATGTCAAGTTCAAGACCATTAGTGATATCAATGACGCTGCAAAAGCCAGAATTAGTAATTCCAGCAACAACAACACCTCGTGAGAGAAAACATCTTTCTGATATAGATGATCAAGGGAGTCTTCGTTTTCAAATTCCCATATTAATGTTTTACAAATATAATCCTTCAATGGAAGGCAAAGATCCTGTAAATCTCATCAAAGAAGGATTGTCAAAGACACTAGTGTTTTACTATCCATTAGCTGGTAGGATCATTGAATTAATGCCTGATAGGAAGCTTGTTGTGGATTGCAATGGTGAAGGAATCTTGTTTGTAGAAGCTGATGCCCAAGTGGAGC…	ATGTCAAGTTCAAGACCATTAGTGATATCAATGACGCTGCAAAAGCCAGAATTAGTAATTCCAGCAACAACAACACCTCGTGAGAGAAAACATCTTTCTGATATAGATGATCAAGGGAGTCTTCGTTTTCAAATTCCCATATTAATGTTTTACAAATATAATCCTTCAATGGAAGGCAAAGATCCTGTAAATCTCATCAAAGAAGGATTGTCAAAGACACTAGTGTTTTACTATCCATTAGCTGGTAGGATCATTGAATTAATGCCTGATAGGAAGCTTGTTGTGGATTGCAATGGTGAAGGAATCTTGTTTGTAGAAGCTGATGCCCAAGTGGAGCTTGACAAGTTAGGAGACTCCATTAAACCACCATGCCCATACTTGGATCAATTGCTATACAAT…
Nta04g27470.1	NtBAHD13	ATGAATTAATGCAAACTTCAATTCAGAAACCAAACTATGTCAATTTCAAGACCATTAGTGATATCAATGACGCTGCAAAAGCCAGAATTAGTAATCCCAGCAACAACACCATCTCGTGATAGAAAACATCTTTCTGATATAGATGATCAAGGGAGTCTTGGTTTTCAAATTCCCATATTAATGTTTTACAAATATAGTCCTTCAATGGAAGGCAAATATCCAGTAAAGGTCATTAAAGAAGGACTGTCAAAGACACTTGTGTTTTACTATCCATTAGCTGGTAGGATCGTTGAATTAATGCCTGATAGGAAGCTTGTTGTGGATTGCAATGGTGAAGGAATCTTGTTTGTAGAAGCTGATGCCCAAGTGGAGCTTGACAAGTTAGGAGACTCCATTAAA…	ATGTCAATTTCAAGACCATTAGTGATATCAATGACGCTGCAAAAGCCAGAATTAGTAATCCCAGCAACAACACCATCTCGTGATAGAAAACATCTTTCTGATATAGATGATCAAGGGAGTCTTGGTTTTCAAATTCCCATATTAATGTTTTACAAATATAGTCCTTCAATGGAAGGCAAATATCCAGTAAAGGTCATTAAAGAAGGACTGTCAAAGACACTTGTGTTTTACTATCCATTAGCTGGTAGGATCGTTGAATTAATGCCTGATAGGAAGCTTGTTGTGGATTGCAATGGTGAAGGAATCTTGTTTGTAGAAGCTGATGCCCAAGTGGAGCTTGACAAGTTAGGAGACTCCATTAAACCACCATGCCCATACTTGGATCAACTGCAATACAAT…
Nta04g27470.2	NtBAHD14	ATGAATTAATGCAAACTTCAATTCAGAAACCAAACTATGTCAATTTCAAGACCATTAGTGATATCAATGACGCTGCAAAAGCCAGAATTAGTAATCCCAGCAACAACACCATCTCGTGATAGAAAACATCTTTCTGATATAGATGATCAAGGGAGTCTTGGTTTTCAAATTCCCATATTAATGTTTTACAAATATAGTCCTTCAATGGAAGGCAAATATCCAGTAAAGGTCATTAAAGAAGGACTGTCAAAGACACTTGTGTTTTACTATCCATTAGCTGGTAGGATCGTTGAATTAATGCCTGATAGGAAGCTTGTTGTGGATTGCAATGGTGAAGGAATCTTGTTTGTAGAAGCTGATGCCCAAGTGGAGCTTGACAAGTTAGGAGACTCCATTAAA…	ATGTCAAGTTCAAGACCATTAGTGATATCAATGACGCTGCAAAAGCCAGAATTAGTAATTCCAGCAACAACAACACCTCGTGAGAGAAAACATCTTTCTGATATAGATGATCAAGGGAGTCTTCGTTTTCAAATTCCCATATTAATGTTTTACAAATATAATCCTTCAATGGAAGGCAAAGATCCTGTAAATCTCATCAAAGAAGGATTGTCAAAGACACTAGTGTTTTACTATCCATTAGCTGGTAGGATCATTGAATTAATGCCTGATAGGAAGCTTGTTGTGGATTGCAATGGTGAAGGAATCTTGTTTGTAGAAGCTGATGCCCAAGTGGAGCTTGACAAGTTAGGAGACTCCATTAAACCACCATGCCCATACTTGGATCAATTGCTATACAAT…
Nta05g07210.1	NtBAHD15	ATAAAATCAGATTACTAGCTGGGTCAACTCCTCCAAATTTGGTAAGAGAGAAAAAAGAGATGAGCAAAAACAAAAAGAAAAGAAAATCAATAAACAGCAACTACCACTAATCAAATGCATGAACCAAGTCCGAAGACTCCACACCGCCCAACCTTATATAAAGCCTCCCTCTTCCTACTCACTCATTCATCCTCAGTCCTCACTTCACTCCTAATTCGAAGTGAGAACTTTGCTGAGTTTCTCTCCACAAACAAATTAATTAAAGCCGCCATTAAAACCCTTTATCAAAAAGCTCTAAACATTAACAATGCCTTGTTTAACCATGGAAGCTGTAACTTTGCTCTCCAAATGCACCATCTTCCCTTCCCAAAAATCTTCTCTCTCTGACCTCAAACTCTC…	ATGCCTTGTTTAACCATGGAAGCTGTAACTTTGCTCTCCAAATGCACCATCTTCCCTTCCCAAAAATCTTCTCTCTCTGACCTCAAACTCTCTGTTTCAGACCTTCCTATGCTATCTACTCACTACATTCAGAAAGGTGGTCTCTTCACTCGTCCTCCTTTCTCCATCACCGACCTCCTTTCCCTCCTCAAACGCAGCCTTTCTCAAACTCTCACCCAATTTCCTCCCTTGGCCGGTCGCCTTGTCACTGACTCTGACGGCTACGTTTACATTTCCTGCAATGGTGCTGGCGCTGGTTTCATTCACGCCGCCGCTAATCACATTTTCGTCCGTGACGTCATTGGTTCAATTGACGTTCCTGACCTTGTCAAGGAGTTCTTCACTTTTGACAGAACTGTG…
Nta05g07220.1	NtBAHD16	ATGCATTGTTCAACCATGGAAGCTGTAACTTTGCTCTCCAAATGCACCATCTTCCCTTCCCAAAAATCTTCTCTCCCTGACCTTAAACTCTCTGTTTCTGACCTTCCTATGCTTTCTACTCACTACATTCAGAAAGGTGGTCTCTTCACTCGTCCTCCTTTCTCTATCACCGACCTCCTTTCCCTCCTCAAACGCAGCCTTTCTCAAACTCTCACCCAATTTCCTCCCCTGGCCGGTCGCTTAGTCACTGACTCTGACGGCTACGTTTACATTTCTTGCAATGATGCTGGTGCTGATTTCATCCACGCCGCCGCTACTCACATTTTTGTCCGTGACGTCATTGGGTCAATCGACGTTCCTGACCATGTCAATGAGTTCTTCGCTTTTGACAGAACTGTG…	ATGCATTGTTCAACCATGGAAGCTGTAACTTTGCTCTCCAAATGCACCATCTTCCCTTCCCAAAAATCTTCTCTCCCTGACCTTAAACTCTCTGTTTCTGACCTTCCTATGCTTTCTACTCACTACATTCAGAAAGGTGGTCTCTTCACTCGTCCTCCTTTCTCTATCACCGACCTCCTTTCCCTCCTCAAACGCAGCCTTTCTCAAACTCTCACCCAATTTCCTCCCCTGGCCGGTCGCTTAGTCACTGACTCTGACGGCTACGTTTACATTTCTTGCAATGATGCTGGTGCTGATTTCATCCACGCCGCCGCTACTCACATTTTTGTCCGTGACGTCATTGGGTCAATCGACGTTCCTGACCATGTCAATGAGTTCTTCGCTTTTGACAGAACTGTG…
Nta05g14400.1	NtBAHD17	CTCCGGTACATTATCAATTTGCTTTTTTATTTTGGTTCAAAATAACTATCCAGTTATATAATCAAGAAAGAATTCAATTTGTTTTTACAAAATAACCCCTATGTATATATTTCTAAAAAGTTTTCTTACTCTTCATACTAAATATTTAATTAGGGGTAGTTTAGACATAGTAGATATTTTTGTATAGAATTTAATATTTTTTTAATGGACGTGCTAAAAGCAAATTGGTCAATTATTATGAATATAAGGGAATACTACTTCTAGTATAAGTAAATCACCTTTCTTGGCTCATTTTCCAATCACCAAAAAAACAAAGCCATTTTCAGTTGTTCATCTCTCTTGCTTTTCCAATTTCATCATCATTTGTGAAATTAGCCATGGCAGGTGAAGTAGCAAAGG…	ATGGCAGGTGAAGTAGCAAAGGAGGAAACTGTTGTTACAAAAGTGAAAATCCTGAAGAAAACCAACGTAAAACCACATAAACCACTAGGCAAAAAAGAGTGTCAATTGGTAACATTTGATCTTCCTTACTTAGCTTTCTATTACAACCAAAAGTTGCTGATCTATAAGGGTGCTGAAAACTTTGATGAAACGGTGGAAAAATTGAAAGATGGTCTAGCCTTAGTGTTGGAAGATTTCTATCAACTAGCTGGGAAACTGGGAAAAGATGAAGAGGGTGTTTTCAAGGTGGAATACGACGATGACATGGACGGCGCGGAGGTGATAGTGGCTGCCGCAGAAGGAATTGATGTTGCAGATCTTACGGATGAAGAAGGCACCTCCAAATTCCTGGATTTAATT…
Nta05g18130.1	NtBAHD18	AGGATTCAAAATGACAGAAGCTGCTATATCTGAAAATATGACCTATTGCTGTATAAAATATTAGACCAATTCAAGTCATCAGCTGAATTTGGAGGCCAACTCTACCAAACTATACCAGTGTTTCCTTCAATCCTTACGCCAGATATTGTAAATTGGTAACATTTGGTTTTGGGGCCAGTAGCCTACCACACCCACATGACAATATCAAAATCTTCCTTAGAACTCATTTTTCAAAGCAAACATTTCAAAAATAAAATAAAAATAAAATTAGAACTTCATTTTTTTGGGGCTAGTCTTCTCCTCTACCATTAAGACAGCTTATGAATAGCTTTAAATATAAGAACAGCTCCTGCAGTCCTTTTCAGTAGTACATCTTTGTTAACCAATACTCAACAAATA…	ATGGAGAATGGTAAAAACCATGTTGCTGTTGAGCTCATTGTGAAGCAAGGAGAACCAACTTTGGTTTCTCCAGCAGAGGAAACAGACATGGGACTATATTACCTTTCAAATCTTGATCAGAACATAGCCGTCCCCGTCCGAACAATTTACTGCTTCAAATCAGAGGAAAAAGGAAATGAGAATGCTGTTGAAGTGATCAAGGAAGCTTTATCAAAGGTTCTTGTTCACTATTATCCACTTGCAGGGAGATTGACAATCAGCCAAGAAGGGAAACTTATAGTGAACTGCAGTGGAGAAGGAGCAGTTTATGTTGAGGCAGAAGCAAATTGTAGTATAGAAGACATTGGTGATATTACTAAGCCTGATCCTGTTACACTTGGCAAGCTTGTTTATGATATT…
Nta05g29800.1	NtBAHD19	TAATGGGCGAAGAAAAGTTGGGGTAGATTAGTCATATCGAACAGGCGCGGTAGGTGAAGTCAAATTTCGAGCCCCAATAGACCAAATCCTACCTCCCCCATACTATATATATGAAACTTTGTGTATTCATCATTTCTGGGAGGTTTTGTATTATATTTCTCAACCCACTCCCAACCATAAAGGAAGAAAAGCTCAACTCCGTTTTTTTATTTACAAGGTAATTTAGTTAACTCGATACCATTTTTCCATTTATATTATGTGTACAATTTCATTTTATGAGGCCGAGAAAAGCTAGAATAAATGTTAATGATAGGTATTTGATACGGAAAGTAGGTGGCCGATCATATTCGTAGTGGATAATTGAAAATGAATTTCTATCTAATAATATATCCATAAGTT…	ATGAAGATCGAGGTGAAAGAATCGACGATGGTGAAGCCGGCGACGGAGACGCCGCAACAGAGGCTGTGGAACTCAAATGTGGATTTAGTGGTGCCGAATTTCCACACGCCGAGTGTTTACTTCTACAGGCCAACGGGATCCCCAAATTTCTTCGACGGAAAAGTGCTAAAGGAGGCACTTAGCAAAGCGCTTGTGCCGTTTTATCCTATGGCTGGGAGACTGTGTAGGGACGAAGACGGTCGTATTGAGATTGACTGTAAAGGTCAGGGAGTGCTTTTTGTGGAAGCTGAGTCGGATGGAGTGGTGGATGATTTTGGTGATTTTGCGCCGACGTTGGAACTCCGTCAACTCATCCCCGCCGTTGATTACTCACAAGGAATTCAATCGTATGCTCTCCTG…
Nta06g07710.1	NtBAHD20	ATGCCTTGTTCCACCATGGGAGTTGTAACTTTGCTCTCAAAATGCACCATCTTCCCTTCCCAAAAATCTTCTCTCTCTGACCTTAAACTCTCAGTTTCCGACCTTCCTATGCTTTCTACTCACTACATTCAGAAAGGTGGTCTTTTCACTCGTCCTCCTTTCTCCATCACCGACCTCCTTTCCCTCCTCAAACGCAGCCTTTCTCAAACTCTTACTCAATTTCCTCCCCTGGCTGGTCGCCTTGTCACTGACTCTGACGGCTACGTTTACATTTCTTGCAATGATGCTGGCGCTGATTTCATTCACGCCGCCGCTACTCACATTTTTGTCCGTGACGTCATTGGTTCCATTGACGTCCCCGACCATGTCAAGGAGTTCTTCACTTTTGACAGAACTGTG…	ATGCCTTGTTCCACCATGGGAGTTGTAACTTTGCTCTCAAAATGCACCATCTTCCCTTCCCAAAAATCTTCTCTCTCTGACCTTAAACTCTCAGTTTCCGACCTTCCTATGCTTTCTACTCACTACATTCAGAAAGGTGGTCTTTTCACTCGTCCTCCTTTCTCCATCACCGACCTCCTTTCCCTCCTCAAACGCAGCCTTTCTCAAACTCTTACTCAATTTCCTCCCCTGGCTGGTCGCCTTGTCACTGACTCTGACGGCTACGTTTACATTTCTTGCAATGATGCTGGCGCTGATTTCATTCACGCCGCCGCTACTCACATTTTTGTCCGTGACGTCATTGGTTCCATTGACGTCCCCGACCATGTCAAGGAGTTCTTCACTTTTGACAGAACTGTG…
Nta06g12830.1	NtBAHD21	CAACCGCTCCCAATATACACTGTTACTATCCCTACACTAGTAGTCTAGTACTACTTCTAGTATAAGTAAATCACCTTTCTTGGCTCATTTTCCAATCACCAAAAAAACAAAGCCATTTTCAGTTGTTCATCTCTCTTGTTTTTCCAATCTCATCACCATTTGTGAAATTAGCCATGGCAGGTGAAGTAGCAAAGGAGGAAACTGTTGTCACAAATGTGAAAATCCTGAAGAAAAGTAACGTAAAACCACATAAACCACTAGGCAAAAAAGAGTGCCAATTGGTAACATTTGATCTTCCTTACTTAGCTTTCTATTACAACCAAAAACTGCTGATCTATAAGGGTGCTGAAAACTTTGAGGAAACGGTGGAAAAACTGAAAGATGGTCTTGCCTTAGTGT…	ATGGCAGGTGAAGTAGCAAAGGAGGAAACTGTTGTCACAAATGTGAAAATCCTGAAGAAAAGTAACGTAAAACCACATAAACCACTAGGCAAAAAAGAGTGCCAATTGGTAACATTTGATCTTCCTTACTTAGCTTTCTATTACAACCAAAAACTGCTGATCTATAAGGGTGCTGAAAACTTTGAGGAAACGGTGGAAAAACTGAAAGATGGTCTTGCCTTAGTGTTGGAAGATTTCTATCAACTAGCTGGGAAACTGGGAAAAGATGAAGAGGAGGTTTTCAAGGTGGAATACGACGATGACATGGACGGCGCGGAGGTGATAGCGGCCGCCGCAGAAGGGATTGAAGTTGCAGATCTTACGGATGAAGAAGGCACCTCCAAATTCCTGGATTTAATT…
Nta06g16320.1	NtBAHD22	GTAGCCTACCACACCCACATGACAATAGCAAAATCTTTCTTAGAACTTATTTTTCAAAGCAAAACACTTCAAAAATAAAATTAGAACTTCATTTTTTGGGGGGCTTAGTCTTCTCTTCCACCATTAAGACAGCTTATGAATAGCTCTAAATATAAAAACAGCACCTGCAGTCTTTTTCAGTAGTACATCTTTGTTAACCAATTCTCAACAAATAGCCAATTATTCTACTCATGCATTTGCTATATAAATATTTCCAGTACTCATTTATCTCCACACCAACAAGTATACCATTCTAAGCCTCAAAATTAGAACATTAATTACACATTTCTGTCTTATAGGTAATTTTCACTTTTTTTGTACTCTTATTTTCTACTAGTTATTTCATGCCATGCCACTTAA…	ATGGAGAATGGTAAAAACAATGTTGCTTTTGAGCTCATTGTGAAGCAAGGAGAACCAACTTTGGTTTCTCCAGCAGAAGAAACAGACAAAGGACTATATTACCTATCCAATCTTGATCAGAACATAGCCGTCCCCGTTCGAACAATTTACTGCTTCAAATCAGAGGAAAAGAGGAATGAGAATGCTGTTGAAGTAATCAAGGAAGCTTTATCAAAGGTTCTTGTTCACTATTATCCACTCGCTGGGAGATTGACAATAAGCCAAGAAGGGAAACTTATAGTGAACTGCAGTGGAGAAGGGGCAGTTTATGTTGAGGCAGAAGCAAATTGTAGCATAGAAGACATTGGTGATATTACTAAGCCTGATCCTGTTACACTTGGCAAGCTTGTTTACGATATT…
Nta06g24980.1	NtBAHD23	GTTTATTTAGGGAATAAGTCAAGTCGAACAGGCGCGGTAGGTGAAGTCAAATTTCGAGCCTCAATATACCAAGTCCGACCTCCCACCATACTATATATATAATACTTTGTGTATTCATCATTTCTGGGAGGTTTTCATTATATTTCTCAACCCACTCCCAACCATATTGCCACCCATAACATAAAAGCGAAAAAAAACTCAACTCCACTTTTTTATTTACAAGGTAATTTAGTTAACTCCATACCATTTTTCCATTTATATTATGTGTATGTATTTCATTTTATGAGGCCGAGAAAAACTAGAATAAATGTTATTGATAGGTATTTAACATGGAAAGTAGGTGGCCGATCACATTCATAGTGGATAATTGAAAGTGAATTTCTATCTAATAATGTATTC…	ATGAAGATCGAAGTGAAAGAATCAACGATGGTAAAGCCGGCGGCGGAGACGCCACAACAGAGGCTGTGGAACTCTAATGTGGATTTGGTGGTGCCGAATTTCCACACGCCAAGTGTTTATTTTTACAGGCCGACGGGATCCCCAAATTTCTTCGACGGAAAAGTGCTGAAGGAAGCTCTAAGCAAAGCACTTGTGCCGTTTTATCCTATGGCGGGGAGGCTGTGTAGGGACGAAGATGGTCGTATTGAGATTGACTGTAAAGGTCAGGGGGTGCTTTTTGTGGAAGCTGAGTCGGATGGTGTGGTGGATGATTTTGGTGATTTTGCCCCGACGTTAGAACTCCGTCAACTCATCCCCGCCGTTGATTACTCACAAGGAATTCAATCGTATGCTCTCTTA…
Nta09g16890.1	NtBAHD24	ATGGCCTCAATTGCTCAATCACCTATAGGAACTACTCCAGAAAATGTCAACAAGTCCTCTGCCACCACCATTTCTCTTCCACTTGTATCCATAATTTCTGAGAAGCTCATCAAACCTTCTTCTCCAACTCCTCATACTAAAAGATGGCACAAACTCTCTCTAATTGATCAAGCTTTCAGCAACTCTTACATTCCATTTTCCCTTTTCTACACCAAACAACAACTAGATGCTATTTCAAAGAATAATAATCCTACTCAAATATCACATCTTCTTGAGGAATCTTTATCGAAAATCTTGTCCACTTATTATCCATATGCCGGAAGGCTTAAGGATAATACTTTGGTTGATTGTAATGACACGGGGGCCGAATTCATTGAAGCTCAAATCAGTTGCCCAATA…	ATGGCCTCAATTGCTCAATCACCTATAGGAACTACTCCAGAAAATGTCAACAAGTCCTCTGCCACCACCATTTCTCTTCCACTTGTATCCATAATTTCTGAGAAGCTCATCAAACCTTCTTCTCCAACTCCTCATACTAAAAGATGGCACAAACTCTCTCTAATTGATCAAGCTTTCAGCAACTCTTACATTCCATTTTCCCTTTTCTACACCAAACAACAACTAGATGCTATTTCAAAGAATAATAATCCTACTCAAATATCACATCTTCTTGAGGAATCTTTATCGAAAATCTTGTCCACTTATTATCCATATGCCGGAAGGCTTAAGGATAATACTTTGGTTGATTGTAATGACACGGGGGCCGAATTCATTGAAGCTCAAATCAGTTGCCCAATA…
Nta09g24910.1	NtBAHD25	ATGCCTTGCTCCGCCATGTCAAAGGCTTCTGGAGCTGTAACTTTGGTCAACAAATGCACCATTTTTCCCTCTCAAAAATCATCTTTTCCTAACCTCAAACTCTCTGTTTCTGACCTGCCTATGCTCTCTGTTCACTATATTCAAAAAGGTTGTCTCTTTACTCGTCCTTCTTTTTCCATCACTCACCTCATTTCCCTTCTCAAGCTCAGTCTTTCTCAAACACTCACTCACTTCCCTCCTTTGGCTGGTCGTCTATTGACCGACCAAGATGGTTACGCCTACATTTCTTGTAACGATGCTGGTGTTGATTTTGTACACGCTATTGCCACTGACATTTTCATTCGCGACGTTACTGGCTTTCTTGATGTTCCTGATCATGTTAAAGAGTTCTTCCCTTTT…	ATGCCTTGCTCCGCCATGTCAAAGGCTTCTGGAGCTGTAACTTTGGTCAACAAATGCACCATTTTTCCCTCTCAAAAATCATCTTTTCCTAACCTCAAACTCTCTGTTTCTGACCTGCCTATGCTCTCTGTTCACTATATTCAAAAAGGTTGTCTCTTTACTCGTCCTTCTTTTTCCATCACTCACCTCATTTCCCTTCTCAAGCTCAGTCTTTCTCAAACACTCACTCACTTCCCTCCTTTGGCTGGTCGTCTATTGACCGACCAAGATGGTTACGCCTACATTTCTTGTAACGATGCTGGTGTTGATTTTGTACACGCTATTGCCACTGACATTTTCATTCGCGACGTTACTGGCTTTCTTGATGTTCCTGATCATGTTAAAGAGTTCTTCCCTTTT…
Nta09g24920.1	NtBAHD26	ATGCCTTGTTCCACAATGTTAACAGCAGCTTCTGGAGCTGTAACTTTGATCAAGAAATGTACCATTTTTCCCTCTCAAAAATCATCTATTCCTGACCTCAAACTCTCTGTTTCTGACCTGCCTATGCTCTCTGTTCACTATATTCAAAAAGGTTGTCTCTTTACTCGTCCTCCTTTTTCCATCGCTCACCTCATTTCGCTTCTCAAGCTCAGTCTTTCTCAAACACTCACTCACTTCCCTCCTTTGGCCGGTCGTCTATTGACTGACCAAGATGGTTACGTCTACATTTCTTGCAACGATGCTGGTGTTGATTTTGAACACGCCACTGCTACTGATATTTTCATTCGCGATGTTATTGGCTCAATTGATGTTCTTGATCATGTTAAAGAGTTCTTCCCT…	ATGCCTTGTTCCACAATGTTAACAGCAGCTTCTGGAGCTGTAACTTTGATCAAGAAATGTACCATTTTTCCCTCTCAAAAATCATCTATTCCTGACCTCAAACTCTCTGTTTCTGACCTGCCTATGCTCTCTGTTCACTATATTCAAAAAGGTTGTCTCTTTACTCGTCCTCCTTTTTCCATCGCTCACCTCATTTCGCTTCTCAAGCTCAGTCTTTCTCAAACACTCACTCACTTCCCTCCTTTGGCCGGTCGTCTATTGACTGACCAAGATGGTTACGTCTACATTTCTTGCAACGATGCTGGTGTTGATTTTGAACACGCCACTGCTACTGATATTTTCATTCGCGATGTTATTGGCTCAATTGATGTTCTTGATCATGTTAAAGAGTTCTTCCCT…
Nta10g14010.1	NtBAHD27	CTTTTGCCATTAAAATTAAGACAAGATATGAAGAAATTACCTGGTGATGTTAGATAGTATTTGAACTTTGGTCTCTCCCAGTTTTCATCCGCATATCTTCCACTTAATTGATCAGGTGTTCTATTGTTAGCACACCAATAACGAATCTTCAAAAGTGAAAACATCCGACTCTTGTTGAAGGTTGCTGGCTATAAATATGCTAAACCAGAAAGGTAGTTATAGAGCAAAAAGAAACATTTCCTTCCAATAGTCAAAGTATTCAAGCAAACAGAGATAGGAAAATGGCCTCAATTGATCAATCACCTATAGGAACTACTCCAGAAAATATCAACAAGCCCTTCTCTGCCACCACCATTTCTCTCCCACTTGTATCCATAATTTCTGAGAAGCTCATTAAAC…	ATGGCCTCAATTGATCAATCACCTATAGGAACTACTCCAGAAAATATCAACAAGCCCTTCTCTGCCACCACCATTTCTCTCCCACTTGTATCCATAATTTCTGAGAAGCTCATTAAACCTTCTTCTCCAACTCCTCATACTAAAAGATGGCACAGACTTTCTCTTATTGATCAAGCTTTCAGCAACTCTTACATTCCATTTTCCCTTTTCTACACCAAACAACAACTAGATGCTATTTCAAAGAACAATAATCCTACTCAAATATCTCATCTTCTTGAGGAATCTTTATCGAAAATCTTGTCCACTTATTATCCATATGCCGGAAGGCTTAAGGATAATAATGTGGTTGATTGTAATGACACGGGGGCCGAATTCGTTGAAGCTCAAATCAGTTGCCCA…
Nta10g21160.1	NtBAHD28	TTGATTTTGAGGTCCAAGTTGCCAATTTTAGAATTTAAGTTGATGTCAAGAAATTGTTCGTAGTTTGATTATTGTTTATAACTAGTTGGGCACGCGCCAACCAGTCATATCTTTGAAATAGTAGTCCCCAAAATCATAATCAAAATAAAAAATGAACACTAGGTCAACTTACCCATGTTTCAAACAGCAATTGCCACCTCCCCAAATGCATGAATCCAAGTTCCATTCACTCCCTATATAAAGCCCTTCTTCTTACTCTCACTTCATCCTCAGCCTTCACATCACTACTTAATCCAAGTCAAACTGCAAATTAATTAACAATGCCTTGCTCCGCCATGTCAAAAGCTTCTGGAGCTGTAACTTTGGTCAACAAATGTACCATTTTTCCCTCTCAAAAAT…	ATGCCTTGCTCCGCCATGTCAAAAGCTTCTGGAGCTGTAACTTTGGTCAACAAATGTACCATTTTTCCCTCTCAAAAATCATCTATTCCTGACCTCAAACTCTCTGTTTCTGACCTTCCTATGCTCTCCGTTCACTATATTCAAAAAGGTTGTCTCTTTACTTGTCCTTCTTTTTCCATCACTCACCTCATTTCCCTTCTCAAGCTCAGTCTTTCTCAAACTCTCACTCACTTCCCTCCTTTGGCCGGTCGTCTATTGACTGACCAAGATGGTTACGTCTACATTTCTTGCAATGATACTGGTGTTGATTTTGTATACGCCACTGCTACTGACATTTTCATTCGCGATGTTATTGGCTCAATTGATGTTCATGATCATGTTAAAGAGTTCTTCCCTTTT…
Nta11g09700.1	NtBAHD29	ATGGGGGTTGCATCAAGATTGCTATCAACAGTTTCCAAGAAGACAATCAAACCTTTTTCTCCCACCCCATCTACTCAAAGATTGCACAAGCTTTGCCTTCCTGGCCAAGCCTTCCCTCCCAATCATATACCCTTGGTGTTTTTCTACCCCAAACAACAAGTAGATACCATATTCCCAAATGGACATAAACAACGACTATCTAAATTTCTAGAGATCTCTTTATCAAAAACATTAACTTGTTACTATCCATGGGCAGGACGTCTAAAAGATAATGCCACTGTAGAATGCAATGATGTTGGGGCCGAGTATTTTGAAGTTCAAATTAATTCTTCAATGGATGAAGTTCTTCATCACTCAGATTCAAGAATCAAGGATTTGGTCACATTTCCTCAAGGTGCA…	ATGGGGGTTGCATCAAGATTGCTATCAACAGTTTCCAAGAAGACAATCAAACCTTTTTCTCCCACCCCATCTACTCAAAGATTGCACAAGCTTTGCCTTCCTGGCCAAGCCTTCCCTCCCAATCATATACCCTTGGTGTTTTTCTACCCCAAACAACAAGTAGATACCATATTCCCAAATGGACATAAACAACGACTATCTAAATTTCTAGAGATCTCTTTATCAAAAACATTAACTTGTTACTATCCATGGGCAGGACGTCTAAAAGATAATGCCACTGTAGAATGCAATGATGTTGGGGCCGAGTATTTTGAAGTTCAAATTAATTCTTCAATGGATGAAGTTCTTCATCACTCAGATTCAAGAATCAAGGATTTGGTCACATTTCCTCAAGGTGCA…
Nta11g22420.1	NtBAHD30	ATGCAAGTTAAAATCTTGTCAAAAAGCCTCATAAAACCATCATCACCAACCCCAGAACACCTTCAGAATTACAACTTATCTTTCTTCGATCAAGTAGCTGACAGAGCACACATGCCTCTTGTTCTTCTCTATCCTCATAATTCTAACAACTCAATAAATATGGAACAAGAGCTCGAAGAATCCTTGTCTAGGGTTTTAACCCATGTTTACCCTATGGCTGGTAGATTCACTGAAGATGAATCTTCAGTTCTTTGCCTCGATCAAGGTGTAACATATATAAAAGCAACCGTTAATTGTAAACTTGTTGATTTTCTCGCACAAGCACGCGAATACCTTGGTCTTGCATTATCTTTTTGGCCTGATGGCATTATGGACGTGGATGACACTAATATATTCATC…	ATGCAAGTTAAAATCTTGTCAAAAAGCCTCATAAAACCATCATCACCAACCCCAGAACACCTTCAGAATTACAACTTATCTTTCTTCGATCAAGTAGCTGACAGAGCACACATGCCTCTTGTTCTTCTCTATCCTCATAATTCTAACAACTCAATAAATATGGAACAAGAGCTCGAAGAATCCTTGTCTAGGGTTTTAACCCATGTTTACCCTATGGCTGGTAGATTCACTGAAGATGAATCTTCAGTTCTTTGCCTCGATCAAGGTGTAACATATATAAAAGCAACCGTTAATTGTAAACTTGTTGATTTTCTCGCACAAGCACGCGAATACCTTGGTCTTGCATTATCTTTTTGGCCTGATGGCATTATGGACGTGGATGACACTAATATATTCATC…
Nta11g31320.1	NtBAHD31	CATTGAGCCAAAGATTCACCTTCATCTCTCTTTTGTAAGGAAGAGTGTCTAACACTTTTCTCTTTGCCTTAGAAAAAATTCACACGTGGCCATCGCCTTTTACAAAATAAGGAAAAATCTACTATTTCTTGCTCATAGAAACATCCGACTTATACTGTAGTCAAGTCGTTCACCTATTTTTCTGATCGTCTTTCCTTATATTCATCAGATTTTTGGCTTTGATCAGGTGAGAATTTAGATGAAGATCGACATTAAGGAATCTATAATGGTGAAACCATCAAAGCCAACTCCTTCAAAAAGGCTATGGAACTCAAATTTGGATTTAATAGTGGGAAGAATTCATCTTTTGACAGTATATTTCTACAAACCAAATGGAATTTCTCCAAATTTCTTTGATTT…	ATGAAGATCGACATTAAGGAATCTATAATGGTGAAACCATCAAAGCCAACTCCTTCAAAAAGGCTATGGAACTCAAATTTGGATTTAATAGTGGGAAGAATTCATCTTTTGACAGTATATTTCTACAAACCAAATGGAATTTCTCCAAATTTCTTTGATTTTAGAATTATGAAGGAGGCTTTAAGCAATATTTTAGTTTCATTTTATCCAATGGCTGGGAGATTGGCTAAGGATAATAATGAAAAAGGAAGAATTGAGATAAATTGTAATGGAGAAGGGGTTCTTTTTATTGAAGCTGAAATTGATGAATTTATTGATGATTTTGGTGATGATTTTACTCCAAGTTTGGAAATAAAGAAGATGTTAATTCCTAATGTTGATACTTCTGGTGACATCTCT…
Nta12g08060.1	NtBAHD32	ATGGCTGCCTCAGCTCTAGTTTCTTTATCCAAGAAAATCATCAAACCATTCTCTCCAACCCCTTCTTCTGAAAGAATTTACAAGCTTTCCTTCATTGATCAATTCAATAGTACACAATATTGCCCCTTAGTCTTCTTCTATCCCAAGAATAAGGGCAATGTAGTAACACCCTCAATTGAACCAAGTGATATGTGTAAGGTTATTGAGAATTCCCTTTCAAAAACCTTAGCTGCTTATTATCCTTTTGCTGGAACATTAAGAGACAATGTTCATGTCGAATGCAACGATATAGGTGCTGATTTTTATAAGGCTCGATTCGATTGTCCCATGTCTGAAATTGTTAAAAGTCCTGATAGAAATGTCAAAGAAATGGTATATCCTAAGGGTATACCATGGAAT…	ATGGCTGCCTCAGCTCTAGTTTCTTTATCCAAGAAAATCATCAAACCATTCTCTCCAACCCCTTCTTCTGAAAGAATTTACAAGCTTTCCTTCATTGATCAATTCAATAGTACACAATATTGCCCCTTAGTCTTCTTCTATCCCAAGAATAAGGGCAATGTAGTAACACCCTCAATTGAACCAAGTGATATGTGTAAGGTTATTGAGAATTCCCTTTCAAAAACCTTAGCTGCTTATTATCCTTTTGCTGGAACATTAAGAGACAATGTTCATGTCGAATGCAACGATATAGGTGCTGATTTTTATAAGGCTCGATTCGATTGTCCCATGTCTGAAATTGTTAAAAGTCCTGATAGAAATGTCAAAGAAATGGTATATCCTAAGGGTATACCATGGAAT…
Nta13g17110.1	NtBAHD33	ATGAAGGTTAGCTTGAAGAACCATTGGGTAGTGAAGCCAGCAGAGCCAACATGGAATGGCACTGTCTCCTTATCAGAATGTGATCAAACTTTTGCTGTAACTCATGTGCCAACCATTTATTACTACAGGTTTTGCCAGGATTGTCTTCCATCAACAGACAACATCATCAAAACCCTCAGGACCTCACTAAGCAAAGCACTAGTACACTTCTATCCATTGGCTGGTCGTTTGCGATGGATCGCTGGGTCCCGCCTCGAGCTCGACTGTAACGCCTCGGGAGTCGTGTTCACGGAAGCTGAAACCGAAGCCAAGCTGGATGATCTTGGTGATTTCTCGCCATCCCCTGACTCTAATAGCTTGTTTCCCCGTGTAGACTACACAATCCCAATTGATGAACTC…	ATGAAGGTTAGCTTGAAGAACCATTGGGTAGTGAAGCCAGCAGAGCCAACATGGAATGGCACTGTCTCCTTATCAGAATGTGATCAAACTTTTGCTGTAACTCATGTGCCAACCATTTATTACTACAGGTTTTGCCAGGATTGTCTTCCATCAACAGACAACATCATCAAAACCCTCAGGACCTCACTAAGCAAAGCACTAGTACACTTCTATCCATTGGCTGGTCGTTTGCGATGGATCGCTGGGTCCCGCCTCGAGCTCGACTGTAACGCCTCGGGAGTCGTGTTCACGGAAGCTGAAACCGAAGCCAAGCTGGATGATCTTGGTGATTTCTCGCCATCCCCTGACTCTAATAGCTTGTTTCCCCGTGTAGACTACACAATCCCAATTGATGAACTC…
Nta13g21800.1	NtBAHD34	CAACATGGAACCCTATAATTTTGGCTATAAATAATCATTCCCAACACCACTCTTCCTTGTACTGGAGGACTTAACCTCTTTCTTCCCTCTCTTTTTTTCCACATTTTACACCTCAAGAAAATCTCATTACCATAAATATATTATATTTATTTACACCCTTTTCTCTCCTTAACCTAAATCTTTGATCTTTTTTTGATTTTTCAAAACAAAATGGGAAGTGAAAAGGTGATGAAGATTAACATCAAAGAATCAACATTAGTAAAACCATCAAAACCAACACCAACAAAGAGACTTTGGAATTCTAACTTAGATTTAATAGTTGGAAGAATTCATCTTTTAACAGTATATTTCTATAAACCAAATGGATCTTCAAATTTCTTTGATTCTAAAGTAATGAAA…	ATGGGAAGTGAAAAGGTGATGAAGATTAACATCAAAGAATCAACATTAGTAAAACCATCAAAACCAACACCAACAAAGAGACTTTGGAATTCTAACTTAGATTTAATAGTTGGAAGAATTCATCTTTTAACAGTATATTTCTATAAACCAAATGGATCTTCAAATTTCTTTGATTCTAAAGTAATGAAAGAAGCATTAAGTAATGTTCTTGTTTCATTTTATCCAATGGCTGGGAGATTAGCTAGAGATGAACAAGGAAGAATTGAGATAAATTGTAATGGAGAAGGAGTTTTGTTTGTTGAAGCTGAAAGTGATGCTTTTGTTGATGATTTTGGTGATTTTACTCCAAGTTTGGAACTTAGGAAACTTATTCCTACTGTTGATACTTCTGGTGATATT…
Nta14g00680.1	NtBAHD35	ATGACTATAAGGAGACCATTATTCTCCCACCACCATTCTCCTCCGTGTCTGCCGTCGTCAACCACCGCAAAAATGGACGTTAACATTAAGGAAACAACCATAATTCTCCCATCAACACCTCCTTTCGCCGACGATCACGTCCTCTCTCTTTCTCACCTAGACACTGACATAAACCTCCATGTCACATTTCGATACCTTCGGGTCTACGTCAATGACCCGGAAAACCAAACCCGAGCACAACCTGACCCGTTTCAAGTTGTCACTTCCTCCCTCTCCGCCGCCCTCGTCAGCTACTACCACTACACTGGCAGCCTCGTCCGTCGTGACACGGACAACCGTCTGGAGCTCCACTGCCACGCTGGCAGTGGAGTCCTAGTGAGACGCGCCACGGTGGATTGT…	ATGACTATAAGGAGACCATTATTCTCCCACCACCATTCTCCTCCGTGTCTGCCGTCGTCAACCACCGCAAAAATGGACGTTAACATTAAGGAAACAACCATAATTCTCCCATCAACACCTCCTTTCGCCGACGATCACGTCCTCTCTCTTTCTCACCTAGACACTGACATAAACCTCCATGTCACATTTCGATACCTTCGGGTCTACGTCAATGACCCGGAAAACCAAACCCGAGCACAACCTGACCCGTTTCAAGTTGTCACTTCCTCCCTCTCCGCCGCCCTCGTCAGCTACTACCACTACACTGGCAGCCTCGTCCGTCGTGACACGGACAACCGTCTGGAGCTCCACTGCCACGCTGGCAGTGGAGTCCTAGTGAGACGCGCCACGGTGGATTGT…
Nta14g16260.1	NtBAHD36	ATGAAGGTTAGCTTGAAGCACCACTGGGTAGTGAAGCCAGCAGAGGCAACATGGAATGGCACTGTCTCCTTATCGGAGTGTGATCAAACTTTTGCTGTAACTCATGTACCAACCATTTATTACTACAGGTTTTGCCATGATTGTCTTCCATCAACAGACAATATCATCAAAACCCTCAGGACCTCACTAAGCAAAGCATTAGTACACTTCTATCCATTGTCTGGTCGTTTGCGATGGATCGCTGGGTCCCGCCTCGAGCTCGACTGTAATGCCTCGGGAATCGTGCTCATGGAAGCTGAAACCGAAGCCAAACTAGATGATCTTGGCGATTTCTCGCCATCCCCTGACTTGAACAGCTTGTTTCCCCGTGTAGACTACACAATCCCAATTGATGAACTC…	ATGAAGGTTAGCTTGAAGCACCACTGGGTAGTGAAGCCAGCAGAGGCAACATGGAATGGCACTGTCTCCTTATCGGAGTGTGATCAAACTTTTGCTGTAACTCATGTACCAACCATTTATTACTACAGGTTTTGCCATGATTGTCTTCCATCAACAGACAATATCATCAAAACCCTCAGGACCTCACTAAGCAAAGCATTAGTACACTTCTATCCATTGTCTGGTCGTTTGCGATGGATCGCTGGGTCCCGCCTCGAGCTCGACTGTAATGCCTCGGGAATCGTGCTCATGGAAGCTGAAACCGAAGCCAAACTAGATGATCTTGGCGATTTCTCGCCATCCCCTGACTTGAACAGCTTGTTTCCCCGTGTAGACTACACAATCCCAATTGATGAACTC…
Nta14g20290.1	NtBAHD37	ATGAAAGAAGCATTAAGTAATGTTCTTGTTTCATTTTACCCAATGGCTGGAAGATTAGCTAGAGATGAACAAGGAAGAATTGAGATAAATTGTAATGGAGAAGGAGTTTTATTTGTTGAAGCTGAAAGTGATGCTTTTGTTGATGATTTTGGTGATTTTACTCCAAGTTTGGAACTTAGGAAACTTATTCCTACTGTTGACACTTCTGGTGATATTTCTACTTTCCCCCTCATCATCTTTCAGGTATTTATATACACCAATATTTTTACACTATCAGTATATTTTTATATGTCGTAATAGGTTTTCTGCTTTATTTTATTGGCTACTGATTTCACTTATTACGATCATCTAGCCGGGGGCGGAGATGATGGGTATATCAGTGTATTTTAATATGTCCTA…	ATGAAAGAAGCATTAAGTAATGTTCTTGTTTCATTTTACCCAATGGCTGGAAGATTAGCTAGAGATGAACAAGGAAGAATTGAGATAAATTGTAATGGAGAAGGAGTTTTATTTGTTGAAGCTGAAAGTGATGCTTTTGTTGATGATTTTGGTGATTTTACTCCAAGTTTGGAACTTAGGAAACTTATTCCTACTGTTGACACTTCTGGTGATATTTCTACTTTCCCCCTCATCATCTTTCAGGTTACTCGTTTCAAATGTGGTGGAGTTTCACTTGGTGGAGGAGTATTCCACACTTTATCAGATGGTCTCTCATCAATTCACTTCATCAACACATGGTCCGATATAGCCCGAGGCCTCTCCGTCGCCATCCCGCCGTTCATCGACCGGACCCTCCTC…
Nta15g22690.1	NtBAHD38	ATGACTGGTTTATCAACAATAATCTCCAAGAAAATAGTCAAACCCTTGTCTCCCACCCCATCAACTCAAAGATGGCACAAGCTTTCCCTTCTTGATCAAGGCATTGGTAACTTTTACATGGGCCTTGTGCTTTTCTACCCAAAACACCAAGTAGATACCTTCCAAATTGAACCAAAACAACTTTCTACACTTCTTGAAAACTCATTGTCAAAAGCATTAACTTATTACTATCCATGGGCGGGAAGTTTAAGAGACAATGCTACCATTGACTGTGATGATACTGGGGCTAAGTTCTTGGATGTTGAAGTGAATTGTCCAATGGATAAAGTTCTTTATCACCAAGATTCAAGCATAAAAAATATAGCATTTCCTCAAGGTGTACCCTTGAGAAATGCTGCA…	ATGACTGGTTTATCAACAATAATCTCCAAGAAAATAGTCAAACCCTTGTCTCCCACCCCATCAACTCAAAGATGGCACAAGCTTTCCCTTCTTGATCAAGGCATTGGTAACTTTTACATGGGCCTTGTGCTTTTCTACCCAAAACACCAAGTAGATACCTTCCAAATTGAACCAAAACAACTTTCTACACTTCTTGAAAACTCATTGTCAAAAGCATTAACTTATTACTATCCATGGGCGGGAAGTTTAAGAGACAATGCTACCATTGACTGTGATGATACTGGGGCTAAGTTCTTGGATGTTGAAGTGAATTGTCCAATGGATAAAGTTCTTTATCACCAAGATTCAAGCATAAAAAATATAGCATTTCCTCAAGGTGTACCCTTGAGAAATGCTGCA…
Nta15g24850.1	NtBAHD39	AACTTCTTGAAATTCTTTATATTGAAAAGCCAATTACCATTGTGTATTCTTAACCAAAAACGTTACACTAATGGCTTCTCTGATTGAGCAATGTCAAGTTGCGCCACCTCCCGGCAGTGCAGCTGAGCTCACACTTCCTCTCACATATTTTGATAATCTATGGTTACTTTTCAACCATAACCGGCGAATTTTGTTCTACAAATTCCCTATTTCCAAACCCGAGTTCGTCCAGACCATTATTCCTACTCTTAAAGATTCTCTCTCCCTCGCTCTCAAACACTATTTACCCTTAGCTGGCAACGTTGTTTGTCCATTATTAGATTGTAGCAGTTATCCTGAATTGTGTTATGTAACAGGAAATTCTTTATCTGTAACTTTTTCTGAGACGGATATGGATTT…	ATGGCTTCTCTGATTGAGCAATGTCAAGTTGCGCCACCTCCCGGCAGTGCAGCTGAGCTCACACTTCCTCTCACATATTTTGATAATCTATGGTTACTTTTCAACCATAACCGGCGAATTTTGTTCTACAAATTCCCTATTTCCAAACCCGAGTTCGTCCAGACCATTATTCCTACTCTTAAAGATTCTCTCTCCCTCGCTCTCAAACACTATTTACCCTTAGCTGGCAACGTTGTTTGTCCATTATTAGATTGTAGCAGTTATCCTGAATTGTGTTATGTAACAGGAAATTCTTTATCTGTAACTTTTTCTGAGACGGATATGGATTTTGATTTTCTCGTTGGTAACCACCCTCGAAATCTGAAGGATTTTTATCATTTTGTTCCTCAATTGAGAGAA…
Nta15g24890.1	NtBAHD40	ATGGCGTCTGTGATTGAGCAATGTCAAGTTGCGCCATCTCCCGGCAGTGCAGCTGAATTGACACTCCCTCTTACTTATTTTGATCATGGTTGGTTAGGTTTCCACCGTATGCGGCGGATTTTATTCTACAAGCTTCCTATTTCCAGACCCGATTTCGTCCAAACCATTATTCCGACGCTTAAAGATTCACTCTCCCTCACTCTCAAACATTATATACCCCTAGCTGGCAACGTTGCTTGTCCACAAGATTGGAGCGGTTATCCTGAGTTACGTTATATAACAGGAGATTCTGTATCTGTTATTTTTTCTGAGAGTGATATGGATTTCAATTATCTCGTTGGTAACCATCCCCGTGATGCTAACGATTTTTATCACTTTATTCCTCAGTTGGCGGAACCT…	ATGGCGTCTGTGATTGAGCAATGTCAAGTTGCGCCATCTCCCGGCAGTGCAGCTGAATTGACACTCCCTCTTACTTATTTTGATCATGGTTGGTTAGGTTTCCACCGTATGCGGCGGATTTTATTCTACAAGCTTCCTATTTCCAGACCCGATTTCGTCCAAACCATTATTCCGACGCTTAAAGATTCACTCTCCCTCACTCTCAAACATTATATACCCCTAGCTGGCAACGTTGCTTGTCCACAAGATTGGAGCGGTTATCCTGAGTTACGTTATATAACAGGAGATTCTGTATCTGTTATTTTTTCTGAGAGTGATATGGATTTCAATTATCTCGTTGGTAACCATCCCCGTGATGCTAACGATTTTTATCACTTTATTCCTCAGTTGGCGGAACCT…
Nta16g14530.1	NtBAHD41	ATGGAAATGAAAGTTGAAATTACACACAAAGATACAATCAAACCATCTTCTCCAACACCTCTAAGCCAAAGAGATTACAAGCTTTCCCTTATAGATCAATTAACCCCAGGTCCTTATGTTCCTATTGTCCTCTTCTATGACTCAACCACCAAATTCTGCCATGATCTCCTCAAAAAATCCCTATCAAAAACCTTGAATTATATGTACCCTCTAGCTGGAAGAATAAAGGATGATTTCACAATCGAATGCAACGATAAAGGAGTCGATTTTCTTGAAGCAAATGTAAGTAACATTACTTTGTCCAACATTGTCAATGACCCAAAAATTGGAACTCTTTCTCAACTTCTTCCATGCCATCCTCATGCAAGATCTAAAGAACCAAGTGATCAAGTTTTGCTA…	ATGGAAATGAAAGTTGAAATTACACACAAAGATACAATCAAACCATCTTCTCCAACACCTCTAAGCCAAAGAGATTACAAGCTTTCCCTTATAGATCAATTAACCCCAGGTCCTTATGTTCCTATTGTCCTCTTCTATGACTCAACCACCAAATTCTGCCATGATCTCCTCAAAAAATCCCTATCAAAAACCTTGAATTATATGTACCCTCTAGCTGGAAGAATAAAGGATGATTTCACAATCGAATGCAACGATAAAGGAGTCGATTTTCTTGAAGCAAATGTAAGTAACATTACTTTGTCCAACATTGTCAATGACCCAAAAATTGGAACTCTTTCTCAACTTCTTCCATGCCATCCTCATGCAAGATCTAAAGAACCAAGTGATCAAGTTTTGCTA…
Nta16g19590.1	NtBAHD42	ATGGCTGTTTTATCAACAATAATCTCCAAGAAAATAGTCAAACCCTTGTCTCCCACCCCATCAACTCAAAGATGGCACAAGCTTTCCCTTCTTGATCAAGGCATAGGTAACTTTTACATGGGCCTTGTGCTTTTCTACCCAAAACACCAAGTAGATATCTTCCAAAATGGACCAAAACAACTTTGTATACTTCTTGAAAACTCATTGTCAAAAGCAATAACTTATTACTATCCATGGGCGGGAAGTTTAAGAGACAATGCTACCATTGCCTGTGATGATACTGGGGCTGAGTTCTTGGAAGTTCAAGTGAATTGTCCAATGGATAAAGTTCTTTATCACCAAGATTCAAGCATAAAAAATATAACATTTCCTCAAGGTGTACCCTTGAGAAATGCTGCA…	ATGGCTGTTTTATCAACAATAATCTCCAAGAAAATAGTCAAACCCTTGTCTCCCACCCCATCAACTCAAAGATGGCACAAGCTTTCCCTTCTTGATCAAGGCATAGGTAACTTTTACATGGGCCTTGTGCTTTTCTACCCAAAACACCAAGTAGATATCTTCCAAAATGGACCAAAACAACTTTGTATACTTCTTGAAAACTCATTGTCAAAAGCAATAACTTATTACTATCCATGGGCGGGAAGTTTAAGAGACAATGCTACCATTGCCTGTGATGATACTGGGGCTGAGTTCTTGGAAGTTCAAGTGAATTGTCCAATGGATAAAGTTCTTTATCACCAAGATTCAAGCATAAAAAATATAACATTTCCTCAAGGTGTACCCTTGAGAAATGCTGCA…
Nta16g21140.1	NtBAHD43	ATGGCTTCTGTGATTGAGCAATGTCAAGTTGCGCCACCTCCCGGCAGTGCAGCTGAGCTCACACTCCCTCTCACATATTTTGATCATATTTGGTTACTTTTCAACCATAACCGGCGAATTTTGTTCTACAAATTCCCTATTTCAAAACCAGAGTTCGTCCAAACCATTATTCCTACTCTTAAAGATTCTCTCTCCCTTACTCTCAAACACTATTTACCCTTAGCTGGCAACATTGTTTGTCCACTATTAGATTGTAGCGGTTATCCTGAATTGCGTTATATAACAGGAGATTCTGTATTTGTCACATTTTCTGAGACTGATATGAATTTTGACTTTCTCGTTGGTAACCATCCTCGAAATCTTAAGGATTTTTATCATTTTGTTCCTCAATTGAGAGAA…	ATGGCTTCTGTGATTGAGCAATGTCAAGTTGCGCCACCTCCCGGCAGTGCAGCTGAGCTCACACTCCCTCTCACATATTTTGATCATATTTGGTTACTTTTCAACCATAACCGGCGAATTTTGTTCTACAAATTCCCTATTTCAAAACCAGAGTTCGTCCAAACCATTATTCCTACTCTTAAAGATTCTCTCTCCCTTACTCTCAAACACTATTTACCCTTAGCTGGCAACATTGTTTGTCCACTATTAGATTGTAGCGGTTATCCTGAATTGCGTTATATAACAGGAGATTCTGTATTTGTCACATTTTCTGAGACTGATATGAATTTTGACTTTCTCGTTGGTAACCATCCTCGAAATCTTAAGGATTTTTATCATTTTGTTCCTCAATTGAGAGAA…
Nta16g21160.1	NtBAHD44	ATGGCATCTGTGATTGAGCAATGTCAAGTTGTGCCATCTCCCGGCAGTGCAACTGAATTGACACTCCCTCTTACATATTTTGATCATGTTTGGTTAGCTTTCCACCGTATGCGGCGGATTTTATTCTACAAGCTTCCTATTTCCAGACCCGATTTCGTCCAAACTATTATTCCTACTCTTAAAGATTCACTCTCCCTCACTCTCAAATATTATTTACCCTTAGCTGGCAACGTTGCTTGTCCACAAGATTGGAGCGGTTATCCTGAGTTACGCTATGTTACAGGAAATTCTGTATCGGTTATTTTTTCTGAGAGTGATATGGATTTCAATTATCTCATTGGTTATCATCCTCGTAACACTAAGGATTTTTATCACTTTGTTCCTCAGCTGGCAGAACCT…	ATGGCATCTGTGATTGAGCAATGTCAAGTTGTGCCATCTCCCGGCAGTGCAACTGAATTGACACTCCCTCTTACATATTTTGATCATGTTTGGTTAGCTTTCCACCGTATGCGGCGGATTTTATTCTACAAGCTTCCTATTTCCAGACCCGATTTCGTCCAAACTATTATTCCTACTCTTAAAGATTCACTCTCCCTCACTCTCAAATATTATTTACCCTTAGCTGGCAACGTTGCTTGTCCACAAGATTGGAGCGGTTATCCTGAGTTACGCTATGTTACAGGAAATTCTGTATCGGTTATTTTTTCTGAGAGTGATATGGATTTCAATTATCTCATTGGTTATCATCCTCGTAACACTAAGGATTTTTATCACTTTGTTCCTCAGCTGGCAGAACCT…
Nta16g21190.1	NtBAHD45	ATGTTACGGGAGATTCTATATCTGTTACTTTTTCTGACTGATACGAATTTCAATTATCTCATTGGTAACCATCTCCGAAATGCTAAGGATTTTTATCACTTGGTTCCTCAGTTGGCAGGACCTAGGCATGCACTTGGGGTCCAATTAGCCCCGCTCTTAGCCATTCAAGTGACACTTTTCCCGAATCATGGAATATCCATTGGTTTCACTACTCATCACATTGTTGGTGATGGAGCTAGCATGGTAGGGTTTGTAAGGGCATGGGCTTTGCTCAACAAATTCGGTGGAGATGAGAAATTCTTATCTAATGAGTTCATTCCGTTTTATGATAGGTCCGTAATCAAAGATCCTCATGGACAAGCGATGTCTATATGGGATGGAATGAGGAAAAATAAGCTT…	ATGTTACGGGAGATTCTATATCTGTTACTTTTTCTGACTGATACGAATTTCAATTATCTCATTGGTAACCATCTCCGAAATGCTAAGGATTTTTATCACTTGGTTCCTCAGTTGGCAGGACCTAGGCATGCACTTGGGGTCCAATTAGCCCCGCTCTTAGCCATTCAAGTGACACTTTTCCCGAATCATGGAATATCCATTGGTTTCACTACTCATCACATTGTTGGTGATGGAGCTAGCATGGTAGGGTTTGTAAGGGCATGGGCTTTGCTCAACAAATTCGGTGGAGATGAGAAATTCTTATCTAATGAGTTCATTCCGTTTTATGATAGGTCCGTAATCAAAGATCCTCATGGACAAGCGATGTCTATATGGGATGGAATGAGGAAAAATAAGCTT…
Nta16g21210.1	NtBAHD46	ATGGCTTTAGTGATTGAGCAATGTCAAATTGCACCATCTCCGGGCAGTGTAGCTGAACTCACACTCCCTCTTACATATTTTGATTTTCAATGGTTAAATTTCCATCGTATGCGGCGGATTCTGTTCTACAAGTTCCCTATTTCCAAAACCACATTCGTCCAAACCATTATTCCTAGTCTTACAAATTCGCTCTCCCTCACTCTCAAACACTATATATCCCTAGCAGGCAATGTTGTTTGTCCGCTAGATTTGAGCGGTTACCCTGAGTTGCGTTATTTAACTGGGGATTCTGTATCTGTTATTTTTTCTGAGTCTTATATGGATTTTGATTTCCTTGTAGGAAATCATCCACGAAATGCGAAGGAATTTTATCCCTTTGTTCCTCAGTTGGCAGACGCT…	ATGGCTTTAGTGATTGAGCAATGTCAAATTGCACCATCTCCGGGCAGTGTAGCTGAACTCACACTCCCTCTTACATATTTTGATTTTCAATGGTTAAATTTCCATCGTATGCGGCGGATTCTGTTCTACAAGTTCCCTATTTCCAAAACCACATTCGTCCAAACCATTATTCCTAGTCTTACAAATTCGCTCTCCCTCACTCTCAAACACTATATATCCCTAGCAGGCAATGTTGTTTGTCCGCTAGATTTGAGCGGTTACCCTGAGTTGCGTTATTTAACTGGGGATTCTGTATCTGTTATTTTTTCTGAGTCTTATATGGATTTTGATTTCCTTGTAGGAAATCATCCACGAAATGCGAAGGAATTTTATCCCTTTGTTCCTCAGTTGGCAGACGCT…
Nta16g23840.1	NtBAHD47	ATGGCTAAAATTCTCAAAGATCCTTATTCTGATAAAGAAGATTTAGTCTATCCGAAAGGAATTCCTTGTACATATTCATATGAGGGTAGTCTTGCAGTGGTTCAACTTAGTTATTTCAATTGTGGAGGAATAGCCGTTAGTGCATGTTTGACACACAAAGTTGGAGATGGATATACAATAGCCAACTTTATTCGAGATTGGGCTACTATAGCACGTAATCCAAGTTCAAAAATACAAAGTCCTCAATTTAATGCTGCGTCTATTTATCCACCTACAAAAGACATGGTAAATCTACCCGAAATTGTGCCAAAAGGAGAAGAATGTTCATCCAAAAGTTTTGCTTTCTCATCATCTAAATTAGCTGCACTGAAATCTATGGTTATAAACAATTCAGTAGTA…	ATGGCTAAAATTCTCAAAGATCCTTATTCTGATAAAGAAGATTTAGTCTATCCGAAAGGAATTCCTTGTACATATTCATATGAGGGTAGTCTTGCAGTGGTTCAACTTAGTTATTTCAATTGTGGAGGAATAGCCGTTAGTGCATGTTTGACACACAAAGTTGGAGATGGATATACAATAGCCAACTTTATTCGAGATTGGGCTACTATAGCACGTAATCCAAGTTCAAAAATACAAAGTCCTCAATTTAATGCTGCGTCTATTTATCCACCTACAAAAGACATGGTAAATCTACCCGAAATTGTGCCAAAAGGAGAAGAATGTTCATCCAAAAGTTTTGCTTTCTCATCATCTAAATTAGCTGCACTGAAATCTATGGTTATAAACAATTCAGTAGTA…
Nta17g05610.1	NtBAHD48	CCAAGCCTCACTCCTAACCTCTATATATACCTTCCAACTGTCCTACTTCTTTCCCCATCCCCTTCTCCCATTTCCCATTTCCCATTCCTTCTCACCATAACAATCAATAAACTCACTGCAACTATGCCTTCTTCTTCAGTTTTTGTCGTTTCTAGATCCACAATATACCCAGAACATCATGAATCTGTTAATAATTCCTTAAGACTCTCTGTTTCTGATCTTCCTATGCTTTCTTGCCAGTATATTCAAAAGGGTGTTTTGTTAACCCAACCCCCAACTGAATTAACTTCCACTCATCTTATTTCCCATCTCAAAATTTCCCTTTCTAAAACTCTCTCCCATTTCCCTCCCTTAGCTGGCCGTCTGATCACTAATTCCGATGGCCACGTGTACATCCTC…	ATGCCTTCTTCTTCAGTTTTTGTCGTTTCTAGATCCACAATATACCCAGAACATCATGAATCTGTTAATAATTCCTTAAGACTCTCTGTTTCTGATCTTCCTATGCTTTCTTGCCAGTATATTCAAAAGGGTGTTTTGTTAACCCAACCCCCAACTGAATTAACTTCCACTCATCTTATTTCCCATCTCAAAATTTCCCTTTCTAAAACTCTCTCCCATTTCCCTCCCTTAGCTGGCCGTCTGATCACTAATTCCGATGGCCACGTGTACATCCTCTGTAACGACGCTGGCGTCGACTTTGTACACGCGAAAGCACCCCATCTTACAATTGCCACTCTAATTCCACCAAATTACTCCGATTTGCCACTTTACTTCAGAAAATTCTTCCAATTCGATAGT…
Nta17g21590.1	NtBAHD49	CTTTTGTCATCATTTGAGCTACATACCTGTTACCACCTCTATATATAGCTTTTGTGTTTCAGTTGTTGGAATTCATCTACAAACACAAATCCAAATATTTATTCTTCATATCCCAATTAATCACTAATATTAAACTTTTATTCTTGATTATCATCTTCATTAATGGATTCAAAGCAATCATCAAAATTAGTGTTCACAGTAAGGAGACAAAACCCAGAGTTAATAGCTCCGGCAAAACCAACTCCACGTGAAACTAAGTTTCTTTCTGATATTGATGATCAAGAAGGTCTTCGATTCCAAATTCCTGTTATTCAATTTTACAGTAAGAATTCTTCTATGGAAGGGAAAGATCCTGTTAATATTATTAAAAAGGCTATAGCTGAAACACTTGTGTTTTAC…	ATGGATTCAAAGCAATCATCAAAATTAGTGTTCACAGTAAGGAGACAAAACCCAGAGTTAATAGCTCCGGCAAAACCAACTCCACGTGAAACTAAGTTTCTTTCTGATATTGATGATCAAGAAGGTCTTCGATTCCAAATTCCTGTTATTCAATTTTACAGTAAGAATTCTTCTATGGAAGGGAAAGATCCTGTTAATATTATTAAAAAGGCTATAGCTGAAACACTTGTGTTTTACTATCCATTTGCTGGCCGGCTCCGGGAAGGAAATGGCCGGAAACTAATGGTGGATTGTACCGGCGAAGGGATTATGTTTGTCGAAGCGGACGCTGATGTTACGCTTGAGGAATTTGGAGATGAACTTCAGCCTCCATTTCCATGCTTAGAAGAGCTTCTTTAT…
Nta17g21630.1	NtBAHD50	CATAAATGGTAGTTATTAACCCATAAATTTAGAATACAACAGATTCAATGCAAAGAACTTTAAGGAATAAACTCATAGAGTTTAAATCCTAGCTTCAGTGTGGAGCCACCTTATAGCAAAGAATTGGCACCCCTTCACAGGAACTATATAGGCAGGTAATTTTTTAAAATTTTTTTTATGTATATATATTATATGTTGAATTTCATTACTTTTTTATAATGTTTACTTTTTACATATTTTTGACAACCCTTGATAAAAATACTATTTTGTCATCATTACAGGTACAACCACTGTTACCACCTCTATATGTAGCTTTTATGTTTCAGTAGTTGGAATTCATCCACAAACAAATGTTTCTTCTTCATATCCCAATTAATCACTAATATTAAACTCACATTC…	ATGGATTCAAAGCAATCATCAGAATTAGTGTTCACAGTATGGAGACAAAAGCCAGAGCTAATAGCTCCAGAAAAACCAACTCCACGTGAAACTAAGTTTCTTTCGGATATTGATGATCAAGAAGGTATGCGATTCCAAATTCCCGTTATTCAATTTTACAGTAAGAATTCTCCTATGGGAGGGAAAGATCCTGTTAATGTTATTAAAAAGGCTATAGCTGAAACACTTGTGTTTTACTATCCATTTGCTGGCCGGCTCCGGGAAGGAACTGGCCGGAAACTTATGGTGGATTGTACCGGCGAAGGGAATATGTTTGTCGACGCGGACGCTGATGTTACACTTGAAGAATTTGGAGATGAACTTCACCCTCCATTTCCATGCTTAGACGAGCTTCTTTTT…
Nta17g21630.3	NtBAHD51	CATAAATGGTAGTTATTAACCCATAAATTTAGAATACAACAGATTCAATGCAAAGAACTTTAAGGAATAAACTCATAGAGTTTAAATCCTAGCTTCAGTGTGGAGCCACCTTATAGCAAAGAATTGGCACCCCTTCACAGGAACTATATAGGCAGGTAATTTTTTAAAATTTTTTTTATGTATATATATTATATGTTGAATTTCATTACTTTTTTATAATGTTTACTTTTTACATATTTTTGACAACCCTTGATAAAAATACTATTTTGTCATCATTACAGGTACAACCACTGTTACCACCTCTATATGTAGCTTTTATGTTTCAGTAGTTGGAATTCATCCACAAACAAATGTTTCTTCTTCATATCCCAATTAATCACTAATATTAAACTCACATTC…	ATGGATTCAAAGCAATCATCAGAATTAGTGTTCACAGTATGGAGACAAAAGCCAGAGCTAATAGCTCCAGAAAAACCAACTCCACGTGAAACTAAGTTTCTTTCGGATATTGATGATCAAGAAGGTATGCGATTCCAAATTCCCGTTATTCAATTTTACAGTAAGAATTCTCCTATGGGAGGGAAAGATCCTGTTAATGTTATTAAAAAGGCTATAGCTGAAACACTTGTGTTTTACTATCCATTTGCTGGCCGGCTCCGGGAAGGAACTGGCCGGAAACTTATGGTGGATTGTACCGGCGAAGGGAATATGTTTGTCGACGCGGACGCTGATGTTACACTTGAAGAATTTGGAGATGAACTTCACCCTCCATTTCCATGCTTAGACGAGCTTCTTTTT…
Nta18g18450.1	NtBAHD52	AACAAAACCAATATAATCTCATAAGTAGGGTACGAGAAGCGTAATATGTATGCAGACTTTATCTCTATTCGAATAGATAGAGAGACAATTTTAGATAGACTTCCGCTCAAAAAATATAAGTAGAGCACATAAGGAGTATAAAATATCCACGATTCCAGGAATAATAATTGAGTGGCTGGTCAAACCACAAAATAATATTCCTCCATTGCCAATTTGCAAAAAAGAAAAACAAACAAAAGTTATTGCCTTGCACAAAGGCTAAAGCCAACTTTGAGCACTTTAAAGTTCCAAACTTCTAGCAGAAAACCAAACTCCTCAATGGCACCTATGCAGCAAATTAAGGTGCTCGAATGTTGCCAAGTTTCGCCACCATCAGGTTCGGTTCCATCAACTATTTTG…	ATGGCACCTATGCAGCAAATTAAGGTGCTCGAATGTTGCCAAGTTTCGCCACCATCAGGTTCGGTTCCATCAACTATTTTGCCATTAACATTCTTAGACATACCTTGGCTTCTTTTCTCCCCAAGTCAACCCCTTTTCTTCTATGATTTCCCTCACACAACTTCTCATTTCAAACAAACAATTCTATCCAACTTCAAAACTTTCCTTTCTTTCACACTCCAATATTTTTTCCCTTTAGCTGGCAATCTAACAATACCACCACAACCAGCTTTACCACACCTTAGCTACACCTCAGGTGACTCTGTTTCATTAACCATAGCAGAGTCCACAGCTGATTTTAACAAACTCTCAGGCTACAACCAAAGGAGTGTTCAAGATTTTCATCAATTAGTCCCTCAA…
Nta18g20140.1	NtBAHD53	ATTACAGGTACATACCACTGTTACCACCTCTATATATAGCTTTATGTCTCAGTAGTTGGAATTCATCTACAAACAAATATTTCTTCTTCATATCCCACCCAATTAATCACTAATATTAAACTCACATTCTTGATTATCATCTTCAATGGATTCAAAGCAATCATCAGAATTAGTGTTCACAGTAAGGAGACAAAAGCCAGAGCTAATAGCTCCGGCAAAACCAACTCCACGTGAAACTAAGTTTCTTTCTGATATTGATGATCAAGAAGGTCTTCGATTTCAAATTCCCGTTATTCAATTTTACCATAAGGATTCTTCTATGGGAAGGAAAGATCCTGTAAAGGTTATTAAAAAGGCTATAGCTGAAACACTTGTGTTTTACTATCCATTTGCTGGCCG…	ATGGATTCAAAGCAATCATCAGAATTAGTGTTCACAGTAAGGAGACAAAAGCCAGAGCTAATAGCTCCGGCAAAACCAACTCCACGTGAAACTAAGTTTCTTTCTGATATTGATGATCAAGAAGGTCTTCGATTTCAAATTCCCGTTATTCAATTTTACCATAAGGATTCTTCTATGGGAAGGAAAGATCCTGTAAAGGTTATTAAAAAGGCTATAGCTGAAACACTTGTGTTTTACTATCCATTTGCTGGCCGTCTCCGGGAAGGAAATGGCCGGAAACTGATGGTGGATTGTACCGGCGAGGGGATTATGTTTGTCGAAGCGGATGCTGATGTTACACTTGAGCAATTTGGAGATGAACTTCAGCCTCCATTTCCATGCTTAGAAGAACTTCTTTAT…
Nta19g02780.1	NtBAHD54	ATGGAATCTGGCCTACAAATCGAAATCATTTCCACAAAACTCATAAAACCATTATTACCAACTCCAAAACACCTTCAAAATTACAAGTTATCGTTCTTCGATCAATTAGCTGAAAGGGAACATATGCCTCATGTACTTTTCTATCCTCGTGACAACAGTTCTATCATCGAATATGATAAGTTCGATGAAAAACTCGAACAATCCCTCTCCAGGATTTTAACTCATGTTTACCCTGCAGCGGGGAGGTTATCAAAAGATCAACTCTCAATCGATTGCCTAGACCAGGGCGTTACGTTTACAAAAGCAAAGGTGAATTGTCAATTCGACGATTTCATCAATCAGGTGAAAAAAGATCTTAATCTTGCTATGTTTTTAGTTCCAAAAGGTATTAAAGATTTG…	ATGGAATCTGGCCTACAAATCGAAATCATTTCCACAAAACTCATAAAACCATTATTACCAACTCCAAAACACCTTCAAAATTACAAGTTATCGTTCTTCGATCAATTAGCTGAAAGGGAACATATGCCTCATGTACTTTTCTATCCTCGTGACAACAGTTCTATCATCGAATATGATAAGTTCGATGAAAAACTCGAACAATCCCTCTCCAGGATTTTAACTCATGTTTACCCTGCAGCGGGGAGGTTATCAAAAGATCAACTCTCAATCGATTGCCTAGACCAGGGCGTTACGTTTACAAAAGCAAAGGTGAATTGTCAATTCGACGATTTCATCAATCAGGTGAAAAAAGATCTTAATCTTGCTATGTTTTTAGTTCCAAAAGGTATTAAAGATTTG…
Nta19g02790.1	NtBAHD55	TTTGGCTCTGCCAGGATTGGCCGAACCCATAACTTTTCCTATATAAAGGGGAAGACACAAGATGTTGATGACATATATTCAAGTACCTCTAACTTCTTCATATCTTTAATTTGTTTTCCCATTTTCCATTATACCCACATTTATATATAATGATTTTCCAAAAAGAAACCATGGAGGTTGAAATCTTGTCAACAAAGTTGATAAAACCATCTTCACCAACTCCAAATTACCTTCAAAATTACAAACTATCTTTCTTTGATCAAATAGCTGATGAGGCACATTTACCTCTTGTTCTTTTCTATCCTCCTGGCAATAGCAATACCAAGAATAATATTGCAGCTGAAGAACAGCTCGAGCAATCCTTATCTAGAATTTTAACCCATGTTTACCCAATTGCTG…	ATGATTTTCCAAAAAGAAACCATGGAGGTTGAAATCTTGTCAACAAAGTTGATAAAACCATCTTCACCAACTCCAAATTACCTTCAAAATTACAAACTATCTTTCTTTGATCAAATAGCTGATGAGGCACATTTACCTCTTGTTCTTTTCTATCCTCCTGGCAATAGCAATACCAAGAATAATATTGCAGCTGAAGAACAGCTCGAGCAATCCTTATCTAGAATTTTAACCCATGTTTACCCAATTGCTGGCAGATTTACTGAGGATAACTCCTCGATTCACTGCCTCGATCAAGGGGTTAAATTTGTCAAAGCCAAGGTAAATTGTAAGCTCAATGACTTTCTTGAGAAAGCACACAAAGATGTCAATCTTGCCTTATCTTGTTGGCCTAAAGATACT…
Nta19g04310.1	NtBAHD56	TCTCAAACCACTATGGTTAGGAAAGTGGGACCAGTCTAATAGACTAGTTGTCATCTTCAACGGGACGGGGTTGGTGAAGTCCTTTAATTTCCATTTTCCTAACTCCCCACACCATTTAAGAAACTTTTCTAATCACTATGATAAATCATTTTCTCTTTAGTTTTAAATCTCCAACCCAACTCCCAACCATATCACAACTCCAAAAGACAAAAACTCAACAAAACCCCACAAAGCCTAATTTTTCAAGTTGCTTCCCCTACCTCGTCTCTTTTCCTACCCACTTTTTCATTCTCACAGGTAATTTCTTCATTATTTCCCCTTCCCTAATTAATTTTCTTTCATCAAAAGTAGTACTTTAAAAGTAAACTCTTTTTTCCTCTTATAAAGTCAAGAACTCTA…	ATGAAAATCGAGGTGAAAGAATCAACAATGGTGAAACCAGCAACAGACACACCACAGACAAACCTGTGGAACTCAAACGTGGATTTAGTTGTTCCAAATTTCCACACCCCAAGTGTTTACTTTTACAGGCCATTGTCAAGTGCTTCAAATTTCTTTGATTCAAATATGCTTAAGGAGGCATTGAGTAAAGCGTTAGTGCCGTTTTATCCAATGGCTGGTAGGTTAAAAAGGGATGAAGATGGACGTATTGAAATTGAATGCATAGGACAAGGGGTTTTGTTTGTTGAAGCAGAATCTGATGGAATAGTTGATGATTTTGGTGATTTTGCGCCTACTTTGGAACTCCGGCGTCTTATTCCTGCCGTTGATTATTCTCAGGGAATCCATTCTTATGCTCTC…
Nta19g11930.1	NtBAHD57	ATTATCATTGGTATTCGTCTCTGAATTAAGTAATATGTATTCTAACCCTAACTTTCGATACTCATGACTAATGTTTGATTTGATGTGAACATTAGTACGGATAATATTCTGTCTCCCGCATCCTCATAAAACCATTTCTCTCACCCTTGCCTGCTGCCCTAGATCCATTTCTCTTCCTCCTTAAAAATGGAAGAAGTTCAACTCATCTCTACCTGTTTAGTTAAGTTGTCAAGATCAAACAACAATGGCAACAACACAACCATTTCCCAAATTGAAATGACACCATGGGACTTGCAATTCCTTCTTGTTGACACTATCCAAAAAGGTCTCCTCTTCAAAAAACCAACTCCTCAACAAGAAAACACTCTGTTCAAATCATTCTCCTCTCTTTCCTTAATT…	ATGGAAGAAGTTCAACTCATCTCTACCTGTTTAGTTAAGTTGTCAAGATCAAACAACAATGGCAACAACACAACCATTTCCCAAATTGAAATGACACCATGGGACTTGCAATTCCTTCTTGTTGACACTATCCAAAAAGGTCTCCTCTTCAAAAAACCAACTCCTCAACAAGAAAACACTCTGTTCAAATCATTCTCCTCTCTTTCCTTAATTGATCACTTGAAAACATCTCTTTCACGCGCCTTAGACTTCTTTCCTCCTCTAGCTGGCCGTTTTTCCACTACTAAAAATGCTCATGATGATACGATTTCTTTCTTCATCACTTGCAATAACGCTGGAGTTGAATTTACTCACGCTATTGCTCCACAATTAACTGTGGAAGAAATTCTTGAATCTTGT…
Nta19g11940.1	NtBAHD58	ATGCGTAACATCGAGTGTGTTACTAAACCATTACTAGGAATTCAAGTAACAGAGCTTGTTGATGGGTATTTTATTGGTTGCACTATGAGTCATAGTGTAGGAGATGGCACTTGCTTTTGGAATTTCTTTAATTCTTGGTCTGAAATATCCAATGGATCTGAGTTTATTAGTAGGTTTCCAGTTCTAAAAAGATGGTTTCCTGAGAATATAAAGCCTCCAATTCATCTTCCTTTGAAGCTAGAAGATCAAGAATTATATGAGTGTATGGAGCTGCCACCATTGAAGGAAAGGATTTTCCATCTCAGTAAAGAAAACATAGGGAAATTGAAAGCAAAAGCTAACTCTGAAATGGGTACTAAATCCATCTCTTCTCTTCAAGCCTTTTTGGCTCATCTATAG…	ATGCGTAACATCGAGTGTGTTACTAAACCATTACTAGGAATTCAAGTAACAGAGCTTGTTGATGGGTATTTTATTGGTTGCACTATGAGTCATAGTGTAGGAGATGGCACTTGCTTTTGGAATTTCTTTAATTCTTGGTCTGAAATATCCAATGGATCTGAGTTTATTAGTAGGTTTCCAGTTCTAAAAAGATGGTTTCCTGAGAATATAAAGCCTCCAATTCATCTTCCTTTGAAGCTAGAAGATCAAGAATTATATGAGTGTATGGAGCTGCCACCATTGAAGGAAAGGATTTTCCATCTCAGTAAAGAAAACATAGGGAAATTGAAAGCAAAAGCTAACTCTGAAATGGGCACAAGACCGAGGCTAAATCCTCCTTTGGCAGAAGGGTATTGGGGA…
Nta20g00930.1	NtBAHD59	ATGGTGGCATTATCAGTTGTTTCTTTGATTTCTAAGAAGATAATCAAACCATCCATTCCAACTCCTCTTTCTCTTAAATCTCACAAACTTTCCTTCGTTGATCAGGTTCTTCATATATCTATTCCTATTGCATTTTTTTACCCAAAAGTTGGCAATTATGCTGCGTACAAGTCATATGAACCTACCCTAGTATCTCAACTTCTTGAGAAATCTCTTTCTAAAACACTTTCATTCTATTATCCTTATGCTGGACGACTAAAGAATGATTCCTCTGTTGATTGCAACGACACGGGAGTTGAGCTTTCCAACGTTCGTGTCCATTGTTCCATGTCCGAAATTTTCAAACACCCTTACACTGAAGCAGAACATGTAGTTTTTCCACAAGCTAAACCTCACGAC…	ATGGTGGCATTATCAGTTGTTTCTTTGATTTCTAAGAAGATAATCAAACCATCCATTCCAACTCCTCTTTCTCTTAAATCTCACAAACTTTCCTTCGTTGATCAGGTTCTTCATATATCTATTCCTATTGCATTTTTTTACCCAAAAGTTGGCAATTATGCTGCGTACAAGTCATATGAACCTACCCTAGTATCTCAACTTCTTGAGAAATCTCTTTCTAAAACACTTTCATTCTATTATCCTTATGCTGGACGACTAAAGAATGATTCCTCTGTTGATTGCAACGACACGGGAGTTGAGCTTTCCAACGTTCGTGTCCATTGTTCCATGTCCGAAATTTTCAAACACCCTTACACTGAAGCAGAACATGTAGTTTTTCCACAAGCTAAACCTCACGAC…
Nta20g08560.1	NtBAHD60	TAATTTTGTAGCAAAACACATTCCTTTCTCACTAATCAAAACCAAATTGATCAAAGTGTCAAAAACACAAAGAAATATGAAGATGCCATCTTCTACTATACTTTCAGAAAAACTCATTAAACCCTCCTCTCCAACTCCTTCTACTCAAAGATGGCACAAACTCTCTCTTCTTGATCAAGCCTTCAGCAATATTTACATTCCCTTTGCCTTTTTCTACACCAAAAAACAACTTGATTCTGTTTCAATTAATCCAACTCAAATATCTCATCTTCTTGAAAATTCATTATCTAAATTACTTGTATCATATTATCCATACGCTGGAAGACTTAAGGATAATACTATCGTCGATTGTAACGATGTCGGTGCTGATTTTTTACGTGTCGAAATTAATATCCCTAT…	ATGAAGATGCCATCTTCTACTATACTTTCAGAAAAACTCATTAAACCCTCCTCTCCAACTCCTTCTACTCAAAGATGGCACAAACTCTCTCTTCTTGATCAAGCCTTCAGCAATATTTACATTCCCTTTGCCTTTTTCTACACCAAAAAACAACTTGATTCTGTTTCAATTAATCCAACTCAAATATCTCATCTTCTTGAAAATTCATTATCTAAATTACTTGTATCATATTATCCATACGCTGGAAGACTTAAGGATAATACTATCGTCGATTGTAACGATGTCGGTGCTGATTTTTTACGTGTCGAAATTAATATCCCTATATCTCAAGCACTTCAAAAACATAATAATGTTATTGAAGAGATGGTATTTCCACGAGATTTACCTTGGTCAAATTGT…
Nta20g10500.1	NtBAHD61	ATGGAAAGAAAGATTGAGATTGTTTGTGTGGAGTTCATTAAACCTGTTTCTCGCACTCCCAGTCACCTTAAATGCTTCGAATTCTCTATTTTGGATCAACACGTACTAACCATACCTGTTCCCTTAGCTCTATTTTATCCTCCTCCTCCCCTGTATGTTGGCGAATCGCTGCGGGCAGCTAATTTATCAAGATTACTTGTATTGAAGAAATCTTTGTCTGAAACACTTGCTCGCTTTTACCCTTTTGCTGGTCGAATCAAGAACAACTCAATTGAATGCAACGACGATGTGGTGCCTTTTTACGAGGCTTTTGCTCATAATTATCAGTTGGAAGATGTTCTTAGAAAGGCTGCAGATGTCAATAAAAAGTTCCTCCCCAGTACTGTTGAAGAGGCCCGA…	ATGGAAAGAAAGATTGAGATTGTTTGTGTGGAGTTCATTAAACCTGTTTCTCGCACTCCCAGTCACCTTAAATGCTTCGAATTCTCTATTTTGGATCAACACGTACTAACCATACCTGTTCCCTTAGCTCTATTTTATCCTCCTCCTCCCCTGTATGTTGGCGAATCGCTGCGGGCAGCTAATTTATCAAGATTACTTGTATTGAAGAAATCTTTGTCTGAAACACTTGCTCGCTTTTACCCTTTTGCTGGTCGAATCAAGAACAACTCAATTGAATGCAACGACGATGTGGTGCCTTTTTACGAGGCTTTTGCTCATAATTATCAGTTGGAAGATGTTCTTAGAAAGGCTGCAGATGTCAATAAAAAGTTCCTCCCCAGTACTGTTGAAGAGGCCCGA…
Nta20g10570.1	NtBAHD62	ATGGCAATACCGACCGTATTTGCTCCCTTAGTTCTATTCTATCCTCCTCCTTCCTCAAATGGTGATGAATCATATTCCAATCTTGAGCAAGCAAGGGTAATACTAAATTCGTCAAGATTACTTGTATTGAAGAAATCTTTGTCTGAAATTCTTGCTCGCTTTTACCCTTTTGCTGGTCGAATCAAGAACAACTCAATTGAATGCAACGACGATGGGATGCCTTTTTACGAGGCTTTTGCACGTAATTATCAGTTTGAAGATGTTCTTCAAAACCCTGACGTAGCTAAACATTTCTTCCCCATAGTTGAAGGTAGCTCAATATTACATAATCCTCTACATGTTCAGGTCACAATGTTCGAGTGTGGAGGTATGGCTATTGGTATGTGTGCTTCTCACAAA…	ATGGCAATACCGACCGTATTTGCTCCCTTAGTTCTATTCTATCCTCCTCCTTCCTCAAATGGTGATGAATCATATTCCAATCTTGAGCAAGCAAGGGTAATACTAAATTCGTCAAGATTACTTGTATTGAAGAAATCTTTGTCTGAAATTCTTGCTCGCTTTTACCCTTTTGCTGGTCGAATCAAGAACAACTCAATTGAATGCAACGACGATGGGATGCCTTTTTACGAGGCTTTTGCACGTAATTATCAGTTTGAAGATGTTCTTCAAAACCCTGACGTAGCTAAACATTTCTTCCCCATAGTTGAAGGTAGCTCAATATTACATAATCCTCTACATGTTCAGGTCACAATGTTCGAGTGTGGAGGTATGGCTATTGGTATGTGTGCTTCTCACAAA…
Nta20g10580.1	NtBAHD63	ATGGAAAGAAAGATTGAGATAGTTTCTATGGAGCTCATTCGACCTACTTCTCCCACTCCTGATCACCTTAGATGCTTTGAATTTTCTTATTTGGATCAAATGGCAATACCCGTATTTGCTCCCTTAGCTCTATTTTATCCTCCCCCTTCTTCTCATTCGACTGGCGGTGATCATGAATCCTATTCCAATCTTGAGGAAGCAAGGGCAGCCAATTCATCAAGATTACTCCTTTTGAAGAAATCTTTGTCTGAAACTCTTGCTCGTTTTTACCCTTTTGCTGGTCGAATTAAGGGCTACTTAATTGAGTGCAACGACGATGGGGTACCTTTCTACGAGGCTTTTGCTCATAATTATCAGTTTGAAGATATTCATAGAAAATTTGACGTAACTAAACATTTC…	ATGGAAAGAAAGATTGAGATAGTTTCTATGGAGCTCATTCGACCTACTTCTCCCACTCCTGATCACCTTAGATGCTTTGAATTTTCTTATTTGGATCAAATGGCAATACCCGTATTTGCTCCCTTAGCTCTATTTTATCCTCCCCCTTCTTCTCATTCGACTGGCGGTGATCATGAATCCTATTCCAATCTTGAGGAAGCAAGGGCAGCCAATTCATCAAGATTACTCCTTTTGAAGAAATCTTTGTCTGAAACTCTTGCTCGTTTTTACCCTTTTGCTGGTCGAATTAAGGGCTACTTAATTGAGTGCAACGACGATGGGGTACCTTTCTACGAGGCTTTTGCTCATAATTATCAGTTTGAAGATATTCATAGAAAATTTGACGTAACTAAACATTTC…
Nta20g10610.1	NtBAHD64	ATGGCACCACCTACATCTGTTCCCTTAGCTCTATTTTATCCTCCTCCTCCCCTGTATGTTGGCGACGAAGCAAGGGCAGCTAATTTATCAAGATTACTTGTATTGAAGAAATCTTTGTCTGAAACTCTTGCTCGCTTTTACCCTTTTGCTGGTCGAATCAAGAACAACTCAATTGAATGCAACGACGATGGGGTGCCTTTTTACGAGGCTTTTGCTCATAATTATCAGTTGGAAGACGTTCTTAGACAACCCGATGTGGATATACATTTCCTTCCTACTGTTAAAGACAACTCATTATTGTCCTATAGTACAGTTCCATTACTCGTTCAAGTCACCATTTTTGAATGTGGGAGCATGGCTATTAGTACGCGTGTTTCTCACAAGATTGTTGATCGTGCC…	ATGGCACCACCTACATCTGTTCCCTTAGCTCTATTTTATCCTCCTCCTCCCCTGTATGTTGGCGACGAAGCAAGGGCAGCTAATTTATCAAGATTACTTGTATTGAAGAAATCTTTGTCTGAAACTCTTGCTCGCTTTTACCCTTTTGCTGGTCGAATCAAGAACAACTCAATTGAATGCAACGACGATGGGGTGCCTTTTTACGAGGCTTTTGCTCATAATTATCAGTTGGAAGACGTTCTTAGACAACCCGATGTGGATATACATTTCCTTCCTACTGTTAAAGACAACTCATTATTGTCCTATAGTACAGTTCCATTACTCGTTCAAGTCACCATTTTTGAATGTGGGAGCATGGCTATTAGTACGCGTGTTTCTCACAAGATTGTTGATCGTGCC…
Nta20g10700.1	NtBAHD65	ATGGAGTCTTTTTCATCGACCCTTTTACTTGTTGTTCAAGTTACCTTCTTGGAATGTGGTGGAATGGTTGTTGGTATTTCAGCTACACACAAAGTTTTGGATACTTCTTCCTTTATCACCTTCTTAACTGACTGGACATCTTTGGCACGCCAAGACGATCCAAATTTTGTACTATCTCCAATTGATCCCATTGCGAAATTCTTACCACCAAGTAATGCATTGCCGCCCTCACCTAGCACTGAAGCCGCGCTTTCAAAGGAGGCCTGTGTTACGAATGTTTATGTTTATAACCCTTCTAGAATAGCACTTCTCAAGACGAAGGCAGCTAGTGACAACATACCTAAACCTTCTCGTGTCGATGTAGTGACAAGTGTCATGTGGAAGTGTTTGACTGTGCAC…	ATGGAGTCTTTTTCATCGACCCTTTTACTTGTTGTTCAAGTTACCTTCTTGGAATGTGGTGGAATGGTTGTTGGTATTTCAGCTACACACAAAGTTTTGGATACTTCTTCCTTTATCACCTTCTTAACTGACTGGACATCTTTGGCACGCCAAGACGATCCAAATTTTGTACTATCTCCAATTGATCCCATTGCGAAATTCTTACCACCAAGTAATGCATTGCCGCCCTCACCTAGCACTGAAGCCGCGCTTTCAAAGGAGGCCTGTGTTACGAATGTTTATGTTTATAACCCTTCTAGAATAGCACTTCTCAAGACGAAGGCAGCTAGTGACAACATACCTAAACCTTCTCGTGTCGATGTAGTGACAAGTGTCATGTGGAAGTGTTTGACTGTGCAC…
Nta20g12010.1	NtBAHD66	ATGGTAGCCAAAGTGGAGATCATATCCAAAGAAATGATCAAACCATCATCCCCAACAACTTCAACCCTTAGAACCCACAAACTATCACTTGTCGATCAAATTTCACCCCCAGTTTTCATCCCTCTAATTTTCTTCTACCAAGATGAACTTGGCAATATCAATCGTTCAAGAAAATTACAGCTCTTGAAGAAATCTCTATCCGATGCTTTAATGCGATTCTACCCATTGGCCGGAAGGTTCAATGATAACAATTTTATTGATTGCAATGATGCTGGAGCCGAGTTTATTGAAGCTCAAGTTCATGGTTACCTTTCACAAGTTATAGAAACTCCAAAAATGGAAGACCTAAGAGAATTTCTCCCAAGAGAAGCATGTGTGGTAGAGAATAATGATGTTCTT…	ATGGTAGCCAAAGTGGAGATCATATCCAAAGAAATGATCAAACCATCATCCCCAACAACTTCAACCCTTAGAACCCACAAACTATCACTTGTCGATCAAATTTCACCCCCAGTTTTCATCCCTCTAATTTTCTTCTACCAAGATGAACTTGGCAATATCAATCGTTCAAGAAAATTACAGCTCTTGAAGAAATCTCTATCCGATGCTTTAATGCGATTCTACCCATTGGCCGGAAGGTTCAATGATAACAATTTTATTGATTGCAATGATGCTGGAGCCGAGTTTATTGAAGCTCAAGTTCATGGTTACCTTTCACAAGTTATAGAAACTCCAAAAATGGAAGACCTAAGAGAATTTCTCCCAAGAGAAGCATGTGTGGTAGAGAATAATGATGTTCTT…
Nta21g02690.1	NtBAHD67	CCGTTTATGCATCAAAATGGTGTAGGCTATTATTTGATATATAGGAATTATCGCATAAAGCTAGGGGATTGAAGTAGTATTATTTGTTCATTAACCATAAAATGGCCGCTTTGCCATTATTATCATCAGACTCACTTGTTTCTATTCGTGACAAATCCTTCATCAAACCTTCTACTCTCACCCCTTCTACACTTAGATTTCACAAGCTATCTTTCGTCGATCAAGCCGTCAGTAATATGTATATTCCTGTGGCCTTTTTTTACCCTAAACCGCAAAGAGAAGAGTCAAACAATTCTCAACTTTCCCATATAGCTGATTTGTTGCAGAGATCTCTGTCACAAACTCTAGTCTCTTACTATCCTTATGCAGGAATATTGAGAGACAATGCTACTGTTGAGT…	ATGGCCGCTTTGCCATTATTATCATCAGACTCACTTGTTTCTATTCGTGACAAATCCTTCATCAAACCTTCTACTCTCACCCCTTCTACACTTAGATTTCACAAGCTATCTTTCGTCGATCAAGCCGTCAGTAATATGTATATTCCTGTGGCCTTTTTTTACCCTAAACCGCAAAGAGAAGAGTCAAACAATTCTCAACTTTCCCATATAGCTGATTTGTTGCAGAGATCTCTGTCACAAACTCTAGTCTCTTACTATCCTTATGCAGGAATATTGAGAGACAATGCTACTGTTGAGTGTAATGACATGGGAGCTGAGTTCTTGAGTGTTAAAATAAATTGTCCTATGTCTGAAATCCTTAACCATCCTCATGCAACTGACGCAGAAAGTATAGTTTTT…
Nta21g02810.1	NtBAHD68	ATGAGCAAGAGTGAAGTGGTGGCAGCAGTTTTGCCAATACAAGAGCATTGGTTACCACTGTCCAATCTTGACTTGCTCTTGCCTCCATTGGATGTTGGAGTTATTTTCTGTTATCAAAATCCCATTTCAGTGACAACAAAACTAGAATTTGGTTCAATGGTTAGAATTCTCAAATCTTCTTTGGCTGAAACATTAGTTATTTACTATGCATTTGCTGGTGAGATAGTTCAGAACTTAGGTGGAGAACCTGAGGTTCTTTGCAACAATAGTGGAGTCAATTTCACAGAAGCTTTTGCTGATGTTGAGCTCAAGGATATTAACTTTTATAATCCAGATGAGAGTATAGAGGGAAAACTTGTTCCAAAGAAGAAGCACGGTGTACTAGCTGTTCAGGTACTG…	ATGAGCAAGAGTGAAGTGGTGGCAGCAGTTTTGCCAATACAAGAGCATTGGTTACCACTGTCCAATCTTGACTTGCTCTTGCCTCCATTGGATGTTGGAGTTATTTTCTGTTATCAAAATCCCATTTCAGTGACAACAAAACTAGAATTTGGTTCAATGGTTAGAATTCTCAAATCTTCTTTGGCTGAAACATTAGTTATTTACTATGCATTTGCTGGTGAGATAGTTCAGAACTTAGGTGGAGAACCTGAGGTTCTTTGCAACAATAGTGGAGTCAATTTCACAGAAGCTTTTGCTGATGTTGAGCTCAAGGATATTAACTTTTATAATCCAGATGAGAGTATAGAGGGAAAACTTGTTCCAAAGAAGAAGCACGGTGTACTAGCTGTTCAGGTTACA…
Nta21g07980.1	NtBAHD69	TTATTGTGAGAAAAAGTTTCTGCTATAAGAAGGCGTGAACTCTTCATAGCTTTGCAACAGCCCTCCATCACATTTCCATTTAGCATTTCTCTCCTTTCCATTGTAGTTTGCAAACATGGGTTCCCAATCTGCTGCCCTGCAAGTTAATATCTTATCCACAAAGTTCATAACACCATCCTCACCAACCCCAAATCACTTACAAAATTACAAGTTATCTTTCTTTGATCAAATAGCTGAAGATGTCCACTTGCCTCTTGTTCTTTTCTATCCACCTAACGACAAAATCTCCACTACGGATGAACAACTCGAAGAATCCCTATCTAGAGTATTAACCCATGTTTACCCGATAGCTGGTAGATTTACAGAGGATTTTTGCTCCATAAATTGCCTTGATCAAGG…	ATGGGTTCCCAATCTGCTGCCCTGCAAGTTAATATCTTATCCACAAAGTTCATAACACCATCCTCACCAACCCCAAATCACTTACAAAATTACAAGTTATCTTTCTTTGATCAAATAGCTGAAGATGTCCACTTGCCTCTTGTTCTTTTCTATCCACCTAACGACAAAATCTCCACTACGGATGAACAACTCGAAGAATCCCTATCTAGAGTATTAACCCATGTTTACCCGATAGCTGGTAGATTTACAGAGGATTTTTGCTCCATAAATTGCCTTGATCAAGGGGTTAAATTTGTAAAGGCAAATGTCAATAGTAAGCTCGATGATTTTCTTGAGCAAGCACACAAGGATGTTAATGCCGCAGTACTTTGTTGGCCTCACGATACTTGGACTGTTGAT…
Nta21g08930.1	NtBAHD70	ATGAGGTCCGTATGTCTAAATTTGAAGGATTCCATGCAAGTTAAAATCTTGTCAAAAAGCCTCATAAAACCATCATCACCAACTCCAGAACACCTTCAGAATTACAACTTATCTTTCTTCGATCAAGTAGCTGACAGAGCACACATGCCTCTTGTTCTTCTATATCCTCATAATTCTAACAACTCAATAAATATGGAACAAGAGCTCGAAGAATCCTTGTCCAGGGTCTTAACCCATGTTTACCCTATGGCTGGTAGATTCACAGAAGATGAATCTTCAGTCCTTTGCCTCGATCAAGGTGTAACATATACAAAAGCAACTGTCAATTGTAAGCTTGTTGATTTTCTCGCACAAGCACGCGAAGACCTTGATCTTGCATTATCTTTTTGGCCTGATGGC…	ATGAGGTCCGTATGTCTAAATTTGAAGGATTCCATGCAAGTTAAAATCTTGTCAAAAAGCCTCATAAAACCATCATCACCAACTCCAGAACACCTTCAGAATTACAACTTATCTTTCTTCGATCAAGTAGCTGACAGAGCACACATGCCTCTTGTTCTTCTATATCCTCATAATTCTAACAACTCAATAAATATGGAACAAGAGCTCGAAGAATCCTTGTCCAGGGTCTTAACCCATGTTTACCCTATGGCTGGTAGATTCACAGAAGATGAATCTTCAGTCCTTTGCCTCGATCAAGGTGTAACATATACAAAAGCAACTGTCAATTGTAAGCTTGTTGATTTTCTCGCACAAGCACGCGAAGACCTTGATCTTGCATTATCTTTTTGGCCTGATGGC…
Nta21g17010.1	NtBAHD71	ATATAATGAAATATTTCAGGCTATAAATATTCCTCCTCATTGAGCCAAAGATTCATCTTCATCTCTCTTTTGTAAGGAGTGCTAGAGTCTAATACTTTTTCTCTTTGCCTTGAAAAAATTCACACGTGGCCACCCGCTTTTCTAAAATAAGGGAAAATCTGTTGCTTACTGCTCATAGGAATATCCGATCCGTACTGTAGTCAAGTCGTTCGCCTATCTTTCTGATCTCCTTTTCTTCTTTCTATCAGATTTTTGGCTTTGTTCCAGTAAGAATTAAGATGAGGATCAATATTAAGGAATCAATAATGGTAAAACCATCAAAGCCAACTCCTTCAAAAAGACTATGGAACTCAAATTTGGATGTAATAGTGGGAAGAATTCATCTTTTGACAGTGTATT…	ATGAGGATCAATATTAAGGAATCAATAATGGTAAAACCATCAAAGCCAACTCCTTCAAAAAGACTATGGAACTCAAATTTGGATGTAATAGTGGGAAGAATTCATCTTTTGACAGTGTATTTCTACAAACCAAATGGAACTTCTCCAAATTTCTTTGATTTTAGAATTATGAAGGAGGCTTTAAGCAATGTTTTAGTTTCATTTTATCCAATGGCTGGGAGATTGGCTAAGGATAATGAAAAAGAAAGAATTGAGATAAATTGTAATGGAGAAGGGGTTCTTTTTATTGAAGCTGAAATTGATGCTTTTATTGATGATTTTGGCGATTTTATTCCAAGTTTGGAGATCAAGAAGATGTTAATTCCTAGTGTTGATACTTCTGGTGACATCTCTTCTTTT…
Nta22g02260.1	NtBAHD72	ATGACTAGTTCAAGACTCATTTCAGTTTCAGAAAAGATTATTAAGCCATTCTCTGCCACCCCATCTCCCCTTAGACATTACAAGCTTTCTCTTATTGATCAACTCATGAGTACCATGTACATTCCCATAGCTTTCTTCTACCGTAGACCTCTAGAGCACAAGATCATCAATAAAAGTTCCAAACTAGAAGTATCTCAAACTCTCGAGAAATCTCTATCGAAAACCTTAAGCTCTTACTATCCATTTGCAGGAAAGTTGAAGGATAATCTATCCATTGAATGCAATGACATGGGAGCCAAATTCTTGAATGTTGAACTGAATTGTTCTATGTCTGAAGTTGTCAATCTTCCGGATACTGGTCCTGAATATTTGGCCTTCCCTAAAAATTTACCTTGGAAT…	ATGACTAGTTCAAGACTCATTTCAGTTTCAGAAAAGATTATTAAGCCATTCTCTGCCACCCCATCTCCCCTTAGACATTACAAGCTTTCTCTTATTGATCAACTCATGAGTACCATGTACATTCCCATAGCTTTCTTCTACCGTAGACCTCTAGAGCACAAGATCATCAATAAAAGTTCCAAACTAGAAGTATCTCAAACTCTCGAGAAATCTCTATCGAAAACCTTAAGCTCTTACTATCCATTTGCAGGAAAGTTGAAGGATAATCTATCCATTGAATGCAATGACATGGGAGCCAAATTCTTGAATGTTGAACTGAATTGTTCTATGTCTGAAGTTGTCAATCTTCCGGATACTGGTCCTGAATATTTGGCCTTCCCTAAAAATTTACCTTGGAAT…
Nta22g02700.1	NtBAHD73	ATGAGCAACACTGAATTGGTGGCAGCAGTTTTGCCAATACAAGAGCATTGGCTACCACTGTCCAATCTTGACTTGCTATTGCCTCCATTGGATGTTGGAGTTATTTTCTGTTATCAAAATCTCATTTCAGTGACAACCAAATTAGAATTTGGTTCAATGGTTAGAATTCTCAAAGCTTCTTTGGCTGAAACATTAGTTTCTTATTATGCATTTGCTGGAGAGATAGTTCAGAACTTAGCTGGAGAACCTGAGGTTCTTTGCAACAATAGTGGAGTCAATTTTACAGAAGCTTTTGCTGATGTTGAGCTCAAAGAGATTAATTTTTATAATCCAGATGAGAGTATAGAGGGAAATCTTGTTCCAAAGAAGAAGCATGGTGTACTAGCTGTTCAGGTACTG…	ATGAGCAACACTGAATTGGTGGCAGCAGTTTTGCCAATACAAGAGCATTGGCTACCACTGTCCAATCTTGACTTGCTATTGCCTCCATTGGATGTTGGAGTTATTTTCTGTTATCAAAATCTCATTTCAGTGACAACCAAATTAGAATTTGGTTCAATGGTTAGAATTCTCAAAGCTTCTTTGGCTGAAACATTAGTTTCTTATTATGCATTTGCTGGAGAGATAGTTCAGAACTTAGCTGGAGAACCTGAGGTTCTTTGCAACAATAGTGGAGTCAATTTTACAGAAGCTTTTGCTGATGTTGAGCTCAAAGAGATTAATTTTTATAATCCAGATGAGAGTATAGAGGGAAATCTTGTTCCAAAGAAGAAGCATGGTGTACTAGCTGTTCAGGTTACA…
Nta23g03470.1	NtBAHD74	TTTTCATACACAGTGAGTGTATATATAAGATAAACCCTTTTCCTACACCGTTGGCTTGTATTACTTGCTTATCTTTCGAATCATAAAAATCTCTTATCCTTCTCGGCCCAAACTCTTTCTCTCCTTCTTCCTGAGAGCTTTTCTTAAAAATGGAAGAAGTTCAAATCATCTCCACCTCTTTAGTTGGAACAACATCAAATATATTAAACTCAGAAAATAATATTTCTAAAATTGAAATGACACCATGGGATTTACAATTCCTCCTTCTTGACACTATCCAAAAAGGCCTCCTTTTTCACAAACCAAAAGAAAATACGTCATTCATTGAACACATAAAAACATCCCTTTCTCGTACCTTAAACTTTTTTCCTCCATTATCCGGCCGTTTCTCCACCGTTA…	ATGGAAGAAGTTCAAATCATCTCCACCTCTTTAGTTGGAACAACATCAAATATATTAAACTCAGAAAATAATATTTCTAAAATTGAAATGACACCATGGGATTTACAATTCCTCCTTCTTGACACTATCCAAAAAGGCCTCCTTTTTCACAAACCAAAAGAAAATACGTCATTCATTGAACACATAAAAACATCCCTTTCTCGTACCTTAAACTTTTTTCCTCCATTATCCGGCCGTTTCTCCACCGTTAGAAACGCCGATGACGACACAATTTCTATCGTCATCGACTGTAATAACGCCGGCGTGGAATTCACCCACGCCGTCGCTCCATTATTAACTGTATCTGCAATTCTTGAATCAGTACACGTACCTCCTATTATTCACACACTTTTCCCACTC…
Nta23g08220.1	NtBAHD75	ATGGCTCCAATGGTTGAAGAACTCCAATTTCCTCATCTTGAAATACCTCTAACTGTTAATTCTATATCTCCAATATTACCTGCAAATCCCATCCCCGCATCCCATGGTGATAGCCTTTACCTATCAAATCTAGATGATATGATCGGAGCTCGCGTTTTTACTCCAACTATGTACTTCTATCGCGATGCAGGGAAACCGGCTGTCATCAAAGTATTAAAAGAAGCTCTTGCAAGTGTACTGGTGCCATATTATCCATTCTCTGGTAGGCTACGAGAAACAGAAAATGGTAAGTTGGAGGTGTTTTTTGGACCTAACCAAGGCGTTCTCCTAGTTGAGGCACGTTCAGAAATGACGCTAGCCAATCTTGGAGATTTAAGTGTGCCAAATCCAGCATGGACA…	ATGGCTCCAATGGTTGAAGAACTCCAATTTCCTCATCTTGAAATACCTCTAACTGTTAATTCTATATCTCCAATATTACCTGCAAATCCCATCCCCGCATCCCATGGTGATAGCCTTTACCTATCAAATCTAGATGATATGATCGGAGCTCGCGTTTTTACTCCAACTATGTACTTCTATCGCGATGCAGGGAAACCGGCTGTCATCAAAGTATTAAAAGAAGCTCTTGCAAGTGTACTGGTGCCATATTATCCATTCTCTGGTAGGCTACGAGAAACAGAAAATGGTAAGTTGGAGGTGTTTTTTGGACCTAACCAAGGCGTTCTCCTAGTTGAGGCACGTTCAGAAATGACGCTAGCCAATCTTGGAGATTTAAGTGTGCCAAATCCAGCATGGACA…
Nta23g21510.1	NtBAHD76	ATGAAGAAGCCATCTTCTACTATACTCTCAAAGAAACTCATTAAACCTTCATCTCCAACTCCTTCTACTCAAAAATGGCACAAACTCTCTCTTCTTGATCAAGCTTTTAGCAATATTTACATACCCTTTGCCTTTTTCTACACCAAAAAACAACTTGATTCTGTTTCAATTCATCCAACTCAAATATCTCATCTTCTCGAAAATTCGTTATCCAGATTACTCGTATCATATTATCCATACGCTGGAAGACTTAAGGATAATACTGTCGTCGATTGTAACGACGTCGGTGCTGATTTTTTACGTGTCCAAATTAATATCCCTATATCTCAAGCACTTGAAAAGCATAATAATGTTATTGAAGAGATGGTATTTCCACAAGATTTACCTTGGTCAAATTGT…	ATGAAGAAGCCATCTTCTACTATACTCTCAAAGAAACTCATTAAACCTTCATCTCCAACTCCTTCTACTCAAAAATGGCACAAACTCTCTCTTCTTGATCAAGCTTTTAGCAATATTTACATACCCTTTGCCTTTTTCTACACCAAAAAACAACTTGATTCTGTTTCAATTCATCCAACTCAAATATCTCATCTTCTCGAAAATTCGTTATCCAGATTACTCGTATCATATTATCCATACGCTGGAAGACTTAAGGATAATACTGTCGTCGATTGTAACGACGTCGGTGCTGATTTTTTACGTGTCCAAATTAATATCCCTATATCTCAAGCACTTGAAAAGCATAATAATGTTATTGAAGAGATGGTATTTCCACAAGATTTACCTTGGTCAAATTGT…
Nta23g23480.1	NtBAHD77	ATGGTTGAATCAACGATTCTTTCCAAAAAGATGATCAAGCCCTCTTCCCCCACCCCTTCTTCCCTTAGTCGTCACAATCTTTCTTTCATTGATCAGATAGCTAGTTCTGCATTCTCTCCAATTGTCGTCTTCTACTCTAAACCTACAAATAACACAAGGCAGATTCTTGAAAATTCTCTTTCAAAAGTATTGTCCTCTTATTATCCCTTTGCCGGAAGAATCAAAGATGATTATGAATACGTTGAGTGTAATGACACAGGTGCTGAGTTTCTAAATGTTCGATTCAGTTGTCCGATGTCTAAAATTCTCAATCAAACCTACAATGATGTTACTGATGTTGTTTTCCCACAAGATTTGCCTTGGAGTGTTACTCAAACGGAAGTTTATTGGTGATTCAGT…	ATGGTTGAATCAACGATTCTTTCCAAAAAGATGATCAAGCCCTCTTCCCCCACCCCTTCTTCCCTTAGTCGTCACAATCTTTCTTTCATTGATCAGATAGCTAGTTCTGCATTCTCTCCAATTGTCGTCTTCTACTCTAAACCTACAAATAACACAAGGCAGATTCTTGAAAATTCTCTTTCAAAAGTATTGTCCTCTTATTATCCCTTTGCCGGAAGAATCAAAGATGATTATGAATACGTTGAGTGTAATGACACAGGTGCTGAGTTTCTAAATTTAAGCCATTTCGATTGTGGTGGAATAGCAATCAGTGGATGCCTATCACACAAGATTGCTGATGGATATAGTCTCTTGAAACTCCTTAAGGATTGGGCTGCTACAGCTCGACTTGAGTTGGAT…
Nta23g23520.1	NtBAHD78	ATGGAAAGAAAGATTGAGATAGTTTCTGTGGAGCTCATTAAACCTCTTTCTCCTACTCCCAATCACCTTAGATGCTACGAATTTTCTCTTCTGGACCAAATGGCTGTAGACATGTCTGTTCCCTTAGCTCTATTCTATCCTCCTCCCTTAGATGGCGGCGAATCATCAAGATTACTCCTTTTGAAGAAATCTTTGTCTGAAATTCTTGCTCGGTTTTACCCTTTTGCTGGCCGAATTAAGGATAACTCAGTTGAATGCAACGACGATGGAGTACCCTTTTACGAGGCTTTTGCTCATAACTATCAGTTGGAAGATGTTCTTAGAAAGCCTGCATATGTCAATGAAAGGTTCCTCCCAACTACTGTTGAAGAGGGATCATTCATGTCTGATTCAGCCTTA…	ATGGAAAGAAAGATTGAGATAGTTTCTGTGGAGCTCATTAAACCTCTTTCTCCTACTCCCAATCACCTTAGATGCTACGAATTTTCTCTTCTGGACCAAATGGCTGTAGACATGTCTGTTCCCTTAGCTCTATTCTATCCTCCTCCCTTAGATGGCGGCGAATCATCAAGATTACTCCTTTTGAAGAAATCTTTGTCTGAAATTCTTGCTCGGTTTTACCCTTTTGCTGGCCGAATTAAGGATAACTCAGTTGAATGCAACGACGATGGAGTACCCTTTTACGAGGCTTTTGCTCATAACTATCAGTTGGAAGATGTTCTTAGAAAGCCTGCATATGTCAATGAAAGGTTCCTCCCAACTACTGTTGAAGAGGGATCATTCATGTCTGATTCAGCCTTA…
Nta23g23630.1	NtBAHD79	ATGGAAAGAAACATTGAGATAGTTTCCGTGGAGCTCATTAGACCTCTTTCTCCTACTCCCAATCACCTTAGATGCTTCGAATTTTCTCTTCTGGACCAAATGGCTGTAGACATGTCTGTTCCCTTAGCTCTGTTCTATCCTACTCCCTTAGATGGCAGCGAATCATCAAGATTACTCCTTTTGAAGAAATCTTTGTCTGAAATTCTTGCTCGGTTTTACCCTTTTGCTGGCCGAATTAAGGATAACTCAGTTGAATGCAACGACGATGGAGTACCCTTTTACGAGGCTTTTGCTCATAACTATCGGTTGGAAGATGTTCTTAGAAAGCCTGCATATGTCAACCAAAAGTTCCTCCCAACTACTGTTGAAGAGGGATCATTGATGCCTGATTCAGCCTTA…	ATGGAAAGAAACATTGAGATAGTTTCCGTGGAGCTCATTAGACCTCTTTCTCCTACTCCCAATCACCTTAGATGCTTCGAATTTTCTCTTCTGGACCAAATGGCTGTAGACATGTCTGTTCCCTTAGCTCTGTTCTATCCTACTCCCTTAGATGGCAGCGAATCATCAAGATTACTCCTTTTGAAGAAATCTTTGTCTGAAATTCTTGCTCGGTTTTACCCTTTTGCTGGCCGAATTAAGGATAACTCAGTTGAATGCAACGACGATGGAGTACCCTTTTACGAGGCTTTTGCTCATAACTATCGGTTGGAAGATGTTCTTAGAAAGCCTGCATATGTCAACCAAAAGTTCCTCCCAACTACTGTTGAAGAGGGATCATTGATGCCTGATTCAGCCTTA…
Nta23g23650.1	NtBAHD80	ATGGTTGAATCAACAATTGTTTCCAGAAAGATGATCAAGCCTTCCTCTCCTACCCCTTCTTCCCTTAGTCGTCACAATCTTTGTTTCCTTGATCATATAGCCACTTCTGCATATGCTCCAATTGCCGTTTTCTACCCCAAACCTACAAATAACATAAGCCAGATTCTTGAAAACTCCCTTTCAAAAGTTTTATCCTCTTATTATCCATTCGCTGGAATAATCACGGATAATAAATATGTCGACTGCAACGACACAGGTGCTGAGTTTCTCAATGTACGAATTAGTTGTTCGATGTCTGAAATTCTCGACCACGCCTATAATGATGCTATTGATGTTGTCTTCCCACCTGATTTGCCTTGGACTAGTTCCTTTGGCCGAAGTCCATTGGTGGTTCAGTTA…	ATGGTTGAATCAACAATTGTTTCCAGAAAGATGATCAAGCCTTCCTCTCCTACCCCTTCTTCCCTTAGTCGTCACAATCTTTGTTTCCTTGATCATATAGCCACTTCTGCATATGCTCCAATTGCCGTTTTCTACCCCAAACCTACAAATAACATAAGCCAGATTCTTGAAAACTCCCTTTCAAAAGTTTTATCCTCTTATTATCCATTCGCTGGAATAATCACGGATAATAAATATGTCGACTGCAACGACACAGGTGCTGAGTTTCTCAATGTACGAATTAGTTGTTCGATGTCTGAAATTCTCGACCACGCCTATAATGATGCTATTGATGTTGTCTTCCCACCTGATTTGCCTTGGACTAGTTCCTTTGGCCGAAGTCCATTGGTGGTTCAGTTA…
Nta23g23670.1	NtBAHD81	ATGGTTGAATCAATGATTCTTTCCAGAAAAATGATCAAGCCCTCCTCCCCCACCGATATTAGTCGTCACAATCTTTCTTTCATTGATCATATAGCTAGTTCTGCATATGTTCCAGTTGCCGCCTTCTACTCCAAACCTGAAAATAACATAAGCCAGATTCTTGAAAACTCCCTTTCAAGAGTATTGTCCTCTTATTATCCCTTTGCCGGAATAATCATGGATAATAAATATGTCGACTGCAACGACACAGGTGCTGAGTTTCTCAATGTGCGAATCAGTTGTCCAATGTCTGAAATTCTCGACCACGCGTACAATGATGTTACTGATGTTGTCTTCCCACAATATTTGCCTTGGAGTAGTTACTCAAACGGAAGTTTATTGGTGGTCCAATTAAGCCAT…	ATGGTTGAATCAATGATTCTTTCCAGAAAAATGATCAAGCCCTCCTCCCCCACCGATATTAGTCGTCACAATCTTTCTTTCATTGATCATATAGCTAGTTCTGCATATGTTCCAGTTGCCGCCTTCTACTCCAAACCTGAAAATAACATAAGCCAGATTCTTGAAAACTCCCTTTCAAGAGTATTGTCCTCTTATTATCCCTTTGCCGGAATAATCATGGATAATAAATATGTCGACTGCAACGACACAGGTGCTGAGTTTCTCAATGTGCGAATCAGTTGTCCAATGTCTGAAATTCTCGACCACGCGTACAATGATGTTACTGATGTTGTCTTCCCACAATATTTGCCTTGGAGTAGTTACTCAAACGGAAGTTTATTGGTGGTCCAATTAAGCCAT…
Nta23g23680.1	NtBAHD82	ATGGCACCACCTACATCTGTTCCCTTAGCTCTATTTTATCCTCCTCCTCTGTATGGTGGCGACGAAGCTAGGGCAGCTAATTCATCAAGATTACTTCTTTTGAAGAAATCTTTGTCTGAAATACTTGCTCGCTTTTACCCTTTTGCTGGTCGAATCAAGAACAGCTCAATTGAATGCAACGACGATGGGGTGCCTTTTTATGAGGCTTTTGCTCATAATTATCAGTTGGAAGACGTTCTTAAACAACCAGATGTGGATGTACATTTCCTTCCTACTGTCGAAGACAACTCATTATTGTCCTATAGTACAGTTCCATTACTCGTACAAGTCACCATTTTTGAATGTGGAAGCATGGCTATTAGTACGCGTGTTTCTCACAAAATTGCTGATCGTGCCTCC…	ATGGCACCACCTACATCTGTTCCCTTAGCTCTATTTTATCCTCCTCCTCTGTATGGTGGCGACGAAGCTAGGGCAGCTAATTCATCAAGATTACTTCTTTTGAAGAAATCTTTGTCTGAAATACTTGCTCGCTTTTACCCTTTTGCTGGTCGAATCAAGAACAGCTCAATTGAATGCAACGACGATGGGGTGCCTTTTTATGAGGCTTTTGCTCATAATTATCAGTTGGAAGACGTTCTTAAACAACCAGATGTGGATGTACATTTCCTTCCTACTGTCGAAGACAACTCATTATTGTCCTATAGTACAGTTCCATTACTCGTACAAGTCACCATTTTTGAATGTGGAAGCATGGCTATTAGTACGCGTGTTTCTCACAAAATTGCTGATCGTGCCTCC…
Nta24g03630.1	NtBAHD83	ATGGCATTTTCAATAACACATCACAAGCCAAAATTAGTAGTTCCAGCAAAAGTAACACCTCGTGAGACAAAACATCTATCTGATATAGATGATCAAGGAAGTACTCATTTCCAAATGCCCACAATAATGTTTTACAAATATAATTCTTCAATGGAAGGGAAAGATCCTGCAAAATTAATCAAAAATGGACTGTCAAAAACCCTAGTATTTTACTATCCATTAGCTGGTAGGATTTTTGAAGGGCCAAATAAGAAGCTTTTGGTAAATTGCAATGGTGAAGGAATCTTGTTTGTTGAAGCTGATGCTAATATAGAGCTTGACAAGTTAGGAAACTCAATTAAACCACCATGTACATACTTGGATTTAGTGATTCACAATGTTCCTGGTTCGGATGGAATC…	ATGGCATTTTCAATAACACATCACAAGCCAAAATTAGTAGTTCCAGCAAAAGTAACACCTCGTGAGACAAAACATCTATCTGATATAGATGATCAAGGAAGTACTCATTTCCAAATGCCCACAATAATGTTTTACAAATATAATTCTTCAATGGAAGGGAAAGATCCTGCAAAATTAATCAAAAATGGACTGTCAAAAACCCTAGTATTTTACTATCCATTAGCTGGTAGGATTTTTGAAGGGCCAAATAAGAAGCTTTTGGTAAATTGCAATGGTGAAGGAATCTTGTTTGTTGAAGCTGATGCTAATATAGAGCTTGACAAGTTAGGAAACTCAATTAAACCACCATGTACATACTTGGATTTAGTGATTCACAATGTTCCTGGTTCGGATGGAATC…
Nta24g08160.1	NtBAHD84	ATGGCTCCACTGGTTGAAGAACTCCAATTTCCTCATCTTGAAATACCTCTAACCATCAATTCTATATCTCCAATATTACCTGCAAACCCCATCCCCGCATCCCATGGTGACAGCCTTTACCTCTCAAATCTAGATGATATGATCGGAGCTCGCGTTTTTACTCCAACTATGTACTTCTATCGCGATGCAGGGAAACCGGCGGCTGTCATCAAAGTATTAAAAGAAGCTCTTGCAAGTGTACTGGTGCCGTATTATCCATTCTCTGGTAGGCTACGAGAAACAGAAAATGGCAAGTTGGAGGTGTTTTTTGGACCTAACCAAGGCGTTCTCCTGGTTGAGGCACGTTCAGAAATGACGTTAGCCAATCTTGGAGATTTAAGTGTGCCAAATCCAGCATGG…	ATGGCTCCACTGGTTGAAGAACTCCAATTTCCTCATCTTGAAATACCTCTAACCATCAATTCTATATCTCCAATATTACCTGCAAACCCCATCCCCGCATCCCATGGTGACAGCCTTTACCTCTCAAATCTAGATGATATGATCGGAGCTCGCGTTTTTACTCCAACTATGTACTTCTATCGCGATGCAGGGAAACCGGCGGCTGTCATCAAAGTATTAAAAGAAGCTCTTGCAAGTGTACTGGTGCCGTATTATCCATTCTCTGGTAGGCTACGAGAAACAGAAAATGGCAAGTTGGAGGTGTTTTTTGGACCTAACCAAGGCGTTCTCCTGGTTGAGGCACGTTCAGAAATGACGTTAGCCAATCTTGGAGATTTAAGTGTGCCAAATCCAGCATGG…
Nta24g09860.1	NtBAHD85	ATGACAATCAAACCATCTTCACCAACCCCAGATGACCTTCACCATTACCAGCTCTCATATCTTGATCAAATTGCTCCAAATATTTTGATGCCCCTAGTTTTTTTCTATGCAGCAGACAATAACCTCACAAACACACAGAGATCAAATCAGCTCAAGAAATCTTTATCACATGTGTTAACCAGATTCTACCCTCTTAGCGGCCGTCTAGAGGCCAATTCTCATGTCAATTGCAACGACGAGGGCATTCCATATATAGAAGCCATAGCCAAATGCAGTCTCTCAGATTTCCTTCTTGATCCAGTTCCTAAAGAACTCAACAAGTTCATCCCTTGTAAGTTACATGATGTTAAAGATTTCTTCTTACTAGTCCAAGCAAACTTTTTTGAGTGTGGAGGAATG…	ATGACAATCAAACCATCTTCACCAACCCCAGATGACCTTCACCATTACCAGCTCTCATATCTTGATCAAATTGCTCCAAATATTTTGATGCCCCTAGTTTTTTTCTATGCAGCAGACAATAACCTCACAAACACACAGAGATCAAATCAGCTCAAGAAATCTTTATCACATGTGTTAACCAGATTCTACCCTCTTAGCGGCCGTCTAGAGGCCAATTCTCATGTCAATTGCAACGACGAGGGCATTCCATATATAGAAGCCATAGCCAAATGCAGTCTCTCAGATTTCCTTCTTGATCCAGTTCCTAAAGAACTCAACAAGTTCATCCCTTGTAAGTTACATGATGTTAAAGATTTCTTCTTACTAGTCCAAGCAAACTTTTTTGAGTGTGGAGGAATG…
Nta24g12220.1	NtBAHD86	CTCACAAGCACTGTTTTTTTGGCCAAAATCATTTTTGCCCAAAAAAATACTCATGTTATAAATATTGTTGGTCTCCCGCATCCTCATGGAACCATAGAAGCACTACCCTTTCTCACACTTGCCTGCTGCCCTAGATCCATTTCTCTTCCTCCTCAGAAAATGGAAGAAGTTCAAGTCATCTCTACCTGTTTAGTTGGGGCAGCTTCCAAATTGTCAAGCTCAAACAACAATGGCAACAACACAACCATTTCCCAAATTGAAATGACACCATGGGACTTGCAATTCCTTCTTGTTGATACTATCCAAAAAGGTCTCCTCTTCAGAAAACCAACTCCCCAACAAGAAAACACTCTATTCAAATCACTTTCCTCTCTTTCCTTAATTGATCACTTGAAAACA…	ATGGAAGAAGTTCAAGTCATCTCTACCTGTTTAGTTGGGGCAGCTTCCAAATTGTCAAGCTCAAACAACAATGGCAACAACACAACCATTTCCCAAATTGAAATGACACCATGGGACTTGCAATTCCTTCTTGTTGATACTATCCAAAAAGGTCTCCTCTTCAGAAAACCAACTCCCCAACAAGAAAACACTCTATTCAAATCACTTTCCTCTCTTTCCTTAATTGATCACTTGAAAACATCTCTTTCTCGCACCTTAGACTTCTTTCCTCCTCTAGCTGGCCGTTTTTCCCCTACTAAAAATGCTAATGATGATACGATGTCTTTCTTCATCACTTGCAATAATGCTGGAGTTGAATTTACTCACGCTATTGCTCTAGAATTAACTGTGGAAGAAATT…
Nta24g18450.1	NtBAHD87	GCTCTCTCCTAAACCACCATGGTTAGGAAAGTCGGACCAGTCTAGTAGACTAGTTGTCATCTAGGAAAGTGGGTAGGTGAAGTCTTTCCATTTTCCTAAACCCCACACAATTTACGAAACTTTTCTAATCACTATGTTAAGTCATTTTCCCTTGAGTTTTAAATCTCCAACCCAACTCCCAACCATATCACAACCCAAAGGACAAAAGCTCAACAAAACCCCACAAAGCCTAATTTTTCAAGTTTCATCCGCCATCTCCCCTACCTCCTCTTTTTTCCTACCCACTTTTTCATTCCATAGGTAATTTCTTCACTATTTCCCCTTCCCTAATTAATTACTACTATGTTTCTTTCATCAAAAGTGGTACTTTAAAAGTAAACTCTTTTTTCCTCTTATAAA…	ATGAAAATCGTGGTGAAAGAATTAACAATGGTGAAACCAGCAACGGACACACCACAGACAAACCTGTGGAATTCAAACGTGGATTTGGTAGTGCCAAATTTCCACACCCCAAGTGTTTACTTTTACAGGCCATTGTCAGGTGCTTCAAATTTCTTTGATTCAAATGTGCTTAAGGAGGCGTTGAGTAAAGCGTTAGTGCCGTTTTATCCAATGGCTGGTAGATTAAAAAAGGATGAAGATGGACGTATTGAAATTGAATGCAGAGGACAAGGGGTTTTGTTTGTTGAAGCAGAGAGTGATGGAACGGTTGATGATTTTGGTGATTTTGCGCCTACTTTGGAACTCCGGCGTCTTATTCCTGCCGTTGATTATACTCAGGGAATCCATTCTTATGCTCTC…
Nta24g18450.2	NtBAHD88	GCTCTCTCCTAAACCACCATGGTTAGGAAAGTCGGACCAGTCTAGTAGACTAGTTGTCATCTAGGAAAGTGGGTAGGTGAAGTCTTTCCATTTTCCTAAACCCCACACAATTTACGAAACTTTTCTAATCACTATGTTAAGTCATTTTCCCTTGAGTTTTAAATCTCCAACCCAACTCCCAACCATATCACAACCCAAAGGACAAAAGCTCAACAAAACCCCACAAAGCCTAATTTTTCAAGTTTCATCCGCCATCTCCCCTACCTCCTCTTTTTTCCTACCCACTTTTTCATTCCATAGGTAATTTCTTCACTATTTCCCCTTCCCTAATTAATTACTACTATGTTTCTTTCATCAAAAGTGGTACTTTAAAAGTAAACTCTTTTTTCCTCTTATAAA…	ATGTTATTGAAAACAAGAATCATGAAAATCGTGGTGAAAGAATTAACAATGGTGAAACCAGCAACGGACACACCACAGACAAACCTGTGGAATTCAAACGTGGATTTGGTAGTGCCAAATTTCCACACCCCAAGTGTTTACTTTTACAGGCCATTGTCAGGTGCTTCAAATTTCTTTGATTCAAATGTGCTTAAGGAGGCGTTGAGTAAAGCGTTAGTGCCGTTTTATCCAATGGCTGGTAGATTAAAAAAGGATGAAGATGGACGTATTGAAATTGAATGCAGAGGACAAGGGGTTTTGTTTGTTGAAGCAGAGAGTGATGGAACGGTTGATGATTTTGGTGATTTTGCGCCTACTTTGGAACTCCGGCGTCTTATTCCTGCCGTTGATTATACTCAG…
Nta24g19800.1	NtBAHD89	AATTCGTGGCTCTCTAGGGTTGGTAGAACCCATCACTTTCCCTATATAAAGGGGAAGGCACGAGATGTTGATGACATATTATTCAAGTACCTCTAACTTCTTCGGTTCTTTAATTTGTTTTCCCTTTTTCCATTATCACCACATTTATCTACCATGATTTTCCAAAAGGAAACCATGGAAGTTGAAATCTTGTCAACAAAGTTGATAAAACCAACTTCACCAACTCCAAATCACCTTCAAAATTACAAACTATCTTTCTTTGATCAAATAGCTGATGAAGCACATTTACCTCTTGTTCTTTTCTATCCTCCTAGTAACAACAACACCAACAATAATAGTACAGCTGAAGATCAGCTCGAGCAATCTTTATCTAGAATTTTAACTCATATTTACCCGGTT…	ATGATTTTCCAAAAGGAAACCATGGAAGTTGAAATCTTGTCAACAAAGTTGATAAAACCAACTTCACCAACTCCAAATCACCTTCAAAATTACAAACTATCTTTCTTTGATCAAATAGCTGATGAAGCACATTTACCTCTTGTTCTTTTCTATCCTCCTAGTAACAACAACACCAACAATAATAGTACAGCTGAAGATCAGCTCGAGCAATCTTTATCTAGAATTTTAACTCATATTTACCCGGTTGCTGGTAGATTTACTGAGGATAACTCCTTGATTCACTGCGCCGATCAAGGGGTTAAATTTGTTAAAGCCAAGGTAAATTGTAAGCTCAATGACTTTCTTGAGAAAGCACACAAAGATGTCAATCTTGCCTTATCTTGTTGGCCTCAAGATACT…
Nta24g19840.1	NtBAHD90	AAGTACCTCTAACTTCTTCGGTTCTTTAATTTGTTTTCCCTTTTTCCATTATCACCACATTTATGTACCATGATTTTCCAAAAGGAAACCATGGAAGTTGAAATCTTGTCAACAAAGTTGATAAAACCAACTTCACCAACTCCAGATCACCTTCAAAATTACAAACTATCTTTCTTTGATCAAATAGCTGATGAAGCACATTTACCTCTTGTTCTTTTCTATCCTCCTAGCAACACCAACACCAACAATAATAGTACAGCTGAAGATCAGCTCGAGCAATCTTTATCTAGAATTTTAACCCATATTTACCCAGTTGCTGGTAGATTTACTGAGGATAACTCCTTGATTCACTGCGCCGATCAAGGGGTTAAATTTGTTAAAGCCAAGGTAAATTGTAAG…	ATGATTTTCCAAAAGGAAACCATGGAAGTTGAAATCTTGTCAACAAAGTTGATAAAACCAACTTCACCAACTCCAGATCACCTTCAAAATTACAAACTATCTTTCTTTGATCAAATAGCTGATGAAGCACATTTACCTCTTGTTCTTTTCTATCCTCCTAGCAACACCAACACCAACAATAATAGTACAGCTGAAGATCAGCTCGAGCAATCTTTATCTAGAATTTTAACCCATATTTACCCAGTTGCTGGTAGATTTACTGAGGATAACTCCTTGATTCACTGCGCCGATCAAGGGGTTAAATTTGTTAAAGCCAAGGTAAATTGTAAGCTCAATGACTTTTTTGAGAAAGCACACAAAGATGTCAATCTTGCCTTATCTTGTTGGCCTCAAGATACT…
Nta24g19920.1	NtBAHD91	TATTATCCAAGTACCTCTAACTTCTTCGGTTCTTTAATTTGTTTTCCCTTTTTCCATTATCACCACATTTATATACTATGATTTTCCAAAAGGAAACCATGGAAGTTGAAATCTTGTCAACAAAGTTGATAAAACCAACTTCACCAACTCCAAATCACTTTCAAAATTTCAAACTATCTTTCTTTGATCAAATAGCCGATGAGCCACATTTACCTCTTGTTCTTTTCTATCCTCCTAGCAACAATACCACCAACAATAATAGTACAACTGAAGATCAGCTCGAGCAATCTTTATCTAGAATTTTAACTCATATTTACCCAGTTGTTGATAGATTTACTGAGGATAACTCCTTGATTTACTGGGTCGATCAAGGGTAAATTTGTTAAATCCAAGGTAAAT…	ATGGCTCTATCTATTAGCCATGCACATACCGCGATGGATGGTTTCACAACTTTCACTTTCGTTCACGAGTGGTCAAAAGTGTACAAATTGGGGATTCCTTCGGAGAAAATCAACTTTTTGAGCTTTAATTTGGCTAAGATTTTCCCACCAAGAGATGTATCGAAAGTTCTCTTGCCTCGTGTCCCCCAGGAAAATCGTATAGACTCAAAACTAGTTGCCAAGAAGTTATACATCAACCAAGATTCTATTTCAAGGCTCAGAGAAGAATTAACAAAATCAACGGATTCTGGAGCTTTATGCTTTAAGCCCTCAAAAGTTGAAATGATCATAGCTCTCTTATGGAGAGCTTTAATCCGCGCTTCAGAGAAACAACACGGGCATTTGAGACGTTCTATAATG…
Nta24g19930.1	NtBAHD92	ATGAGTACTGCACACCCTGCTATCGATGGATGGACAAGTTTTACGTTCATTTACGAGGGGTCAAAAGTGTGTAAATTGGGAATTTCAGCTGAAAACATCAATTTCATGAGCTTTAATTTGGTTAACATTTTTGGACCAAGAGATATATCCAAGATGTTTAAGCCTTCTGCTATTTTCCCAGGAAAACGTCTAGACACTAAATTGGTGGCCAAAAAGTTTGTTATAGATGAAGTCTCTTTATTAAAACTCAGAGACAAATTAACAAATTGTAACAATTCAGGTGTTTTAAGTTTTAAACCTTCACGAGTTGAGATGATCACAGCAATTTTATGGAGGGCTCTGCTTCACGCTTCACAGGCAATATCAGGGAAATGGAAGCCATCATTAATGTCATTTCCA…	ATGAGTACTGCACACCCTGCTATCGATGGATGGACAAGTTTTACGTTCATTTACGAGGGGTCAAAAGTGTGTAAATTGGGAATTTCAGCTGAAAACATCAATTTCATGAGCTTTAATTTGGTTAACATTTTTGGACCAAGAGATATATCCAAGATGTTTAAGCCTTCTGCTATTTTCCCAGGAAAACGTCTAGACACTAAATTGGTGGCCAAAAAGTTTGTTATAGATGAAGTCTCTTTATTAAAACTCAGAGACAAATTAACAAATTGTAACAATTCAGGTGTTTTAAGTTTTAAACCTTCACGAGTTGAGATGATCACAGCAATTTTATGGAGGGCTCTGCTTCACGCTTCACAGGCAATATCAGGGAAATGGAAGCCATCATTAATGTCATTTCCA…
Nta24g19940.1	NtBAHD93	ATGGAATTTGGCCTACAAGTTGAAATCATTTCCACAAAACTCATAAAACCATCTACACCAACTCCAAAACATCTTCAAAATTACAAATTATCGTTCTTTGATCAATTAGCTGAAAGGGAACATATGCCTCATGTACTTTTCTATCCTCGTGACAACAAGTCCATCATCGAATATGACAAGTTCGATGAAAAACTCGAACAATCCCTGTCCAGGATTTTAACTCATGTTTACCCTGCAGCCGGAAGGTTATCAAAAGATCAACTCTCAATAAATTGCCTAGATCAGGGCGTTACGTTTACTAAAGCCAAGGTCAGTTGTCAATTCGACGATTTCATCAATCAGGTAAAAAAGGATCTTAATCTCGCCCTGTTTTTAATTCCAAAAGGTATCAAAGATTTG…	ATGGAATTTGGCCTACAAGTTGAAATCATTTCCACAAAACTCATAAAACCATCTACACCAACTCCAAAACATCTTCAAAATTACAAATTATCGTTCTTTGATCAATTAGCTGAAAGGGAACATATGCCTCATGTACTTTTCTATCCTCGTGACAACAAGTCCATCATCGAATATGACAAGTTCGATGAAAAACTCGAACAATCCCTGTCCAGGATTTTAACTCATGTTTACCCTGCAGCCGGAAGGTTATCAAAAGATCAACTCTCAATAAATTGCCTAGATCAGGGCGTTACGTTTACTAAAGCCAAGGTCAGTTGTCAATTCGACGATTTCATCAATCAGGTAAAAAAGGATCTTAATCTCGCCCTGTTTTTAATTCCAAAAGGTATCAAAGATTTG…
Nta00g00540.1	NtBAHD94	ATGGAAGTAACCATCCACGAAACCACTACGATCTTCCCTTCTAAGCCGCCTTTCTCCGAAAATCATGTCCTTCCTCTCTCCCACCTTGACACCGACCGCAACCTCAATCTCACTTTCCGTTACCTCCGTGTCTACGTCAACCACACAACACAACAATTGGACCCATATGAAGTTCTCACCTCCTCCCTCTCCGCCGCTCTCGTCCCCTACTACCAATTCACCGGCTGTCTCCGTCGTCGTCCGTCGGACAACCGCCTAGAACTTTACTGTCAAGTAGGGAATGGCATTCCTGTAATTCTGTCCACAGTTGATTGTACCTTGGCCTCTATTAACTACCTGGATGATCCAGATTATGAGTTTGCTGAGAAGTTGGTACCCGACCCGAGATATGACGAGGCA…	ATGGAAGTAACCATCCACGAAACCACTACGATCTTCCCTTCTAAGCCGCCTTTCTCCGAAAATCATGTCCTTCCTCTCTCCCACCTTGACACCGACCGCAACCTCAATCTCACTTTCCGTTACCTCCGTGTCTACGTCAACCACACAACACAACAATTGGACCCATATGAAGTTCTCACCTCCTCCCTCTCCGCCGCTCTCGTCCCCTACTACCAATTCACCGGCTGTCTCCGTCGTCGTCCGTCGGACAACCGCCTAGAACTTTACTGTCAAGTAGGGAATGGCATTCCTGTAATTCTGTCCACAGTTGATTGTACCTTGGCCTCTATTAACTACCTGGATGATCCAGATTATGAGTTTGCTGAGAAGTTGGTACCCGACCCGAGATATGACGAGGCA…

## Sheet: HQT gene 
Tobacco gene database accession number (http://lifenglab.hzau.edu.cn/Nicomics/index.php )	NCBI accession number	gene name
Nta11g31320.1	XM_009800234.1	NtHQT1	ATGAAGATCGACATTAAGGAATCTATAATGGTGAAACCATCAAAGCCAACTCCTTCAAAAAGGCTATGGAACTCAAATTTGGATTTAATAGTGGGAAGAATTCATCTTTTGACAGTATATTTCTACAAACCAAATGGAATTTCTCCAAATTTCTTTGATTTTAGAATTATGAAGGAGGCTTTAAGCAATATTTTAGTTTCATTTTATCCAATGGCTGGGAGATTGGCTAAGGATAATAATGAAAAAGGAAGAATTGAGATAAATTGTAATGGAGAAGGGGTTCTTTTTATTGAAGCTGAAATTGATGAATTTATTGATGATTTTGGTGATGATTTTACTCCAAGTTTGGAAATAAAGAAGATGTTAATTCCTAATGTTGATACTTCTGGTGACATCTCT…
Nta21g17010.1	XM_016628801.1	NtHQT2	ATGAGGATCAATATTAAGGAATCAATAATGGTAAAACCATCAAAGCCAACTCCTTCAAAAAGACTATGGAACTCAAATTTGGATGTAATAGTGGGAAGAATTCATCTTTTGACAGTGTATTTCTACAAACCAAATGGAACTTCTCCAAATTTCTTTGATTTTAGAATTATGAAGGAGGCTTTAAGCAATGTTTTAGTTTCATTTTATCCAATGGCTGGGAGATTGGCTAAGGATAATGAAAAAGAAAGAATTGAGATAAATTGTAATGGAGAAGGGGTTCTTTTTATTGAAGCTGAAATTGATGCTTTTATTGATGATTTTGGCGATTTTATTCCAAGTTTGGAGATCAAGAAGATGTTAATTCCTAGTGTTGATACTTCTGGTGACATCTCTTCTTTT…
Nta13g21800.1	AJ582651	NtHQT3	ATGGGAAGTGAAAAGGTGATGAAGATTAACATCAAAGAATCAACATTAGTAAAACCATCAAAACCAACACCAACAAAGAGACTTTGGAATTCTAACTTAGATTTAATAGTTGGAAGAATTCATCTTTTAACAGTATATTTCTATAAACCAAATGGATCTTCAAATTTCTTTGATTCTAAAGTAATGAAAGAAGCATTAAGTAATGTTCTTGTTTCATTTTATCCAATGGCTGGGAGATTAGCTAGAGATGAACAAGGAAGAATTGAGATAAATTGTAATGGAGAAGGAGTTTTGTTTGTTGAAGCTGAAAGTGATGCTTTTGTTGATGATTTTGGTGATTTTACTCCAAGTTTGGAACTTAGGAAACTTATTCCTACTGTTGATACTTCTGGTGATATT…
Nta14g20290.1	XM_009626002.3	NtHQT4	ATGAAAGAAGCATTAAGTAATGTTCTTGTTTCATTTTACCCAATGGCTGGAAGATTAGCT AGAGATGAACAAGGAAGAATTGAGATAAATTGTAATGGAGAAGGAGTTTTATTTGTTGAA GCTGAAAGTGATGCTTTTGTTGATGATTTTGGTGATTTTACTCCAAGTTTGGAACTTAGG AAACTTATTCCTACTGTTGACACTTCTGGTGATATTTCTACTTTCCCCCTCATCATCTTT CAGGTTACTCGTTTCAAATGTGGTGGAGTTTCACTTGGTGGAGGAGTATTCCACACTTTA TCAGATGGTCTCTCATCAATTCACTTCATCAACACATGGTCCGATATAGCCCGAGGCCTC TCCGTCGCCATCCCGCCGTTCATCGACCGGACC…

## Sheet: Transcriptome data
ID	DC1	DC2	DC3	RO1	RO2	RO3	ST1	ST2	ST3	YL1	YL2	YL3	ML1	ML2	ML3	SL1	SL2	SL3	YF1	YF2	YF3	MF1	MF2	MF3	SF1	SF2
Nta14g20290.1	0.29395	0.063525	0.178461	43.7199	44.7934	25.1843	2.86434	2.37378	4.7923	9.52551	11.8743	10.241	14.1274	18.1701	22.7733	15.856	15.2431	21.5522	2.13567	4.60897	3.24368	11.4142	4.93666	6.27404	3.59829	5.27392
Nta11g31320.1	0	0	0	0	0.061225	0	0.256116	0.051182	0.020617	0.268266	1.61526	0.087663	0.621068	0.373693	0.350295	0.102131	0.142172	0.946208	0.04924	0.425895	0.149838	0.034107	0.815239	0.383954	0.078458	0
Nta13g21800.1	0.305012	0.181264	0.390399	90.3415	104.694	37.8832	10.1017	8.31829	8.65808	8.48318	20.5979	8.75624	3.82355	5.2809	8.97622	15.9051	5.14753	8.56062	1.58648	1.90294	1.14703	24.5204	3.07209	7.73821	3.81618	10.4056
Nta11g31320.1	0	0	0	0.017367	0	0	0.165275	0.069742	0.089844	0.150757	1.32685	0.293389	0.591462	0.514662	0.493499	0.051668	0.203096	1.461	0.375331	0.358836	0.201453	0.141353	2.56511	1.23742	0.044807	0
ID	Name
DC1	Dry Capsule
DC2	Dry Capsule
DC3	Dry Capsule
RO1	Root
RO2	Root
RO3	Root
ST1	Stem
ST2	Stem
ST3	Stem
YL1	Young Leaf
YL2	Young Leaf
YL3	Young Leaf
ML1	Mature Leaf
ML2	Mature Leaf
ML3	Mature Leaf
SL1	Senescent Leaf
SL2	Senescent Leaf
SL3	Senescent Leaf
YF1	Immature Flower
YF2	Immature Flower
YF3	Immature Flower
MF1	Mature Flower
MF2	Mature Flower
MF3	Mature Flower
SF1	Senescent Flower
SF2	Senescent Flower
